# Supplementary material for: Asymmetric N-alkylation of indoles with isatins catalyzed by N-heterocyclic carbene: efficient synthesis of functionalized cyclic N,O-aminal indole derivatives
Source: Royal Society of Chemistry journal article supplement (doi:10.1039/d0qo00237b), 2020-01-01
Supplement: d0qo00237b1.pdf [file d0qo00237b1.pdf]

*Supporting Information*

**Asymmetric *N*-alkylation of indoles with isatins catalyzed by  
*N*-heterocyclic carbene: efficient synthesis of functionalized cyclic  
*N,O*-aminal indole derivatives**

Chengyuan Wang, Zhuopeng Li, Jiong Zhang, and Xin-Ping Hui\*

*State Key Laboratory of Applied Organic Chemistry, College of Chemistry and Chemical Engineering,  
Lanzhou University, Lanzhou 730000, P. R. China*

\*Corresponding authors: E-mail: [huixp@lzu.edu.cn](mailto:huixp@lzu.edu.cn)

**Contents**

|                                                                                                                                            |    |
|--------------------------------------------------------------------------------------------------------------------------------------------|----|
| 1. General information.....                                                                                                                | 2  |
| 2. Optimization of reaction conditions.....                                                                                                | 2  |
| 3. General procedure for NHC-catalyzed annulation of indole-2-formaldehydes with isatins..                                                 | 4  |
| 4. General procedure for NHC-catalyzed annulation of indole-2-formaldehydes with 3-methyl<br>-1-phenyl-1 <i>H</i> -pyrazole-4,5-dione..... | 14 |
| 5. References.....                                                                                                                         | 14 |
| 6. NMR spectra of the compounds <b>5a–5s</b> and <b>7</b> .....                                                                            | 15 |
| 7. HPLC spectra of the compounds <b>5a–5s</b> and <b>7</b> .....                                                                           | 36 |

## 1. General information

Optical rotation was measured by the Perkin Elmer 341 polarimeter.  $^1\text{H}$  NMR and  $^{13}\text{C}$  NMR spectra were recorded on a Bruker AVANCE III 400 spectrometer using tetramethylsilane (TMS) as internal reference, and chemical shifts ( $\delta$ ) and coupling constants ( $J$ ) were expressed in ppm and Hz, respectively. The HRMS analysis was obtained on a Bruker ApexII FT-ICR mass spectrometer with ESI ionization method. The *ee* value determination was carried out using chiral HPLC with Chirapak AD-H, OD-H and OJ column on Agilent 1260 with a UV-detector. Melting points were determined on an XT-4 melting point apparatus and were uncorrected. All syntheses and manipulations were carried out under a dry nitrogen atmosphere. DCM was freshly distilled from phosphorous pentoxide. Toluene and THF were freshly distilled from a deep-blue solution of sodium-benzophenone under nitrogen. Other chemicals were purchased from commercial suppliers and used directly. Flash column chromatography was carried out utilizing 200–300 mesh silica gel.

*N*-Heterocyclic carbene precatalyst **3a** was commercially available from TCI. Precatalysts **3b–3e** were synthesized according to the literature,<sup>1-4</sup> respectively. *1H*-Indole-2-carbaldehydes **1** were synthesized according to the literature.<sup>5</sup>

## 2. Optimization of reaction conditions

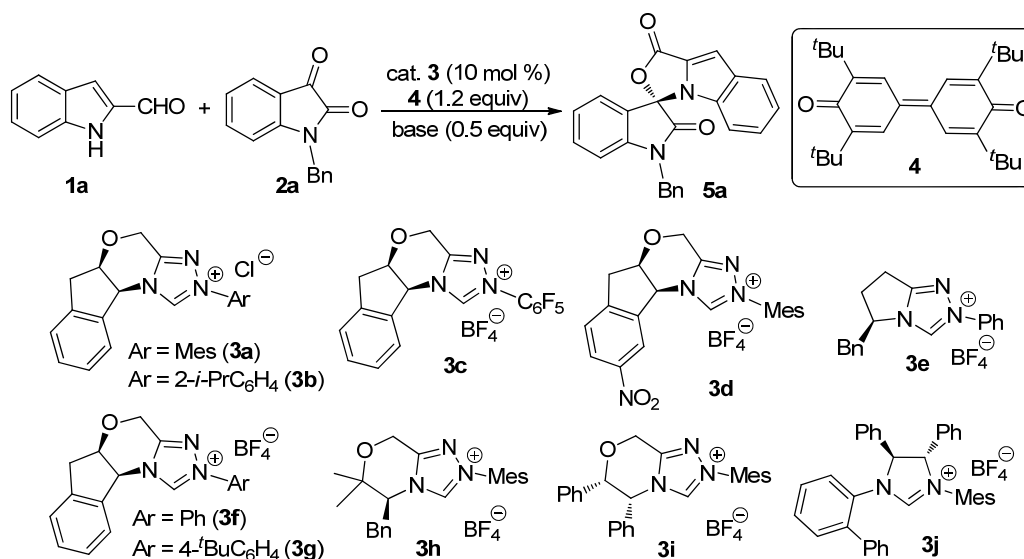

**Table S1.** Optimization of reaction conditions<sup>a</sup>

| entry           | cat.      | base              | solvent           | temp (°C) | time (h) | yield (%) <sup>b</sup> | ee (%) <sup>c</sup> |
|-----------------|-----------|-------------------|-------------------|-----------|----------|------------------------|---------------------|
| 1               | <b>3a</b> | DBU               | THF               | 30        | 0.5      | 58                     | 77                  |
| 2               | <b>3b</b> | DBU               | THF               | 30        | 0.5      | 58                     | 62                  |
| 3               | <b>3c</b> | DBU               | THF               | 30        | 0.5      | 58                     | 0                   |
| 4               | <b>3d</b> | DBU               | THF               | 30        | 0.5      | 58                     | 78                  |
| 5               | <b>3e</b> | DBU               | THF               | 30        | 12       | trace                  | -                   |
| 6               | <b>3f</b> | DBU               | THF               | 30        | 12       | 47                     | 0                   |
| 7               | <b>3g</b> | DBU               | THF               | 30        | 12       | trace                  | -                   |
| 8               | <b>3h</b> | DBU               | THF               | 30        | 12       | 10                     | 59                  |
| 9               | <b>3i</b> | DBU               | THF               | 30        | 24       | nr                     | -                   |
| 10              | <b>3j</b> | DBU               | THF               | 30        | 12       | nr                     | -                   |
| 11              | <b>3a</b> | DABCO             | THF               | 30        | 0.5      | 79                     | 77                  |
| 12              | <b>3a</b> | DIPEA             | THF               | 30        | 0.5      | 81                     | 77                  |
| 13              | <b>3a</b> | Et <sub>3</sub> N | THF               | 30        | 0.5      | 84                     | 77                  |
| 14              | <b>3b</b> | Et <sub>3</sub> N | THF               | 30        | 0.5      | 79                     | 66                  |
| 15              | <b>3c</b> | Et <sub>3</sub> N | THF               | 30        | 0.5      | 76                     | 9                   |
| 16              | <b>3d</b> | Et <sub>3</sub> N | THF               | 30        | 0.5      | 83                     | 84                  |
| 17              | <b>3d</b> | Et <sub>3</sub> N | PhCH <sub>3</sub> | 30        | 2        | 74                     | 85                  |
| 18              | <b>3d</b> | Et <sub>3</sub> N | DCM               | 30        | 22       | 71                     | 64                  |
| 19              | <b>3d</b> | Et <sub>3</sub> N | THF               | 0         | 11       | 82                     | 88                  |
| 20              | <b>3d</b> | Et <sub>3</sub> N | THF               | -10       | 5        | 71                     | 90                  |
| 21 <sup>d</sup> | <b>3d</b> | Et <sub>3</sub> N | THF               | -10       | 12       | 81                     | 90                  |
| 22 <sup>e</sup> | <b>3d</b> | Et <sub>3</sub> N | THF               | -10       | 12       | 87                     | 90                  |
| 23 <sup>f</sup> | <b>3d</b> | Et <sub>3</sub> N | THF               | -10       | 12       | 94                     | 90                  |

<sup>a</sup>Reaction conditions: **1a** (0.2 mmol, 2 equiv), **2a** (0.1 mmol), cat. **3** (0.01 mmol, 0.1 equiv), base (0.05 mmol, 0.5 equiv), quinone **4** (0.12 mmol, 1.2 equiv), solvent (1 mL). <sup>b</sup>Isolated yield.

<sup>c</sup>Determined by chiral HPLC analysis. <sup>d</sup>Quinone **4** (1.5 equiv) was used. <sup>e</sup>Quinone **4** (1.7 equiv) was used. <sup>f</sup>Quinone **4** (2 equiv) was used.

### 3. General procedure for NHC-catalyzed annulation of indole-2-formaldehydes with isatins

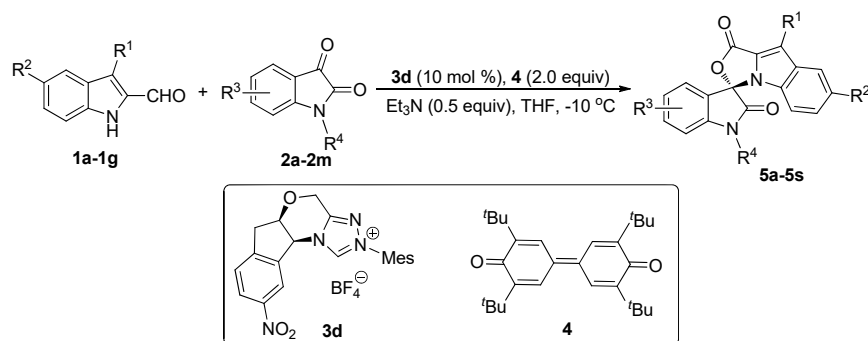

To a dry Schlenk tube with a magnetic stirring bar was charged indole-2-formaldehyde **1** (0.2 mmol), isatin **2** (0.1 mmol), NHC precatalyst **3d** (0.01 mmol, 4.6 mg), and quinone **4** (0.2 mmol, 81.8 mg), a solution of Et<sub>3</sub>N (0.05 mmol) in dry THF (1 mL) was added under nitrogen atmosphere. The reaction mixture was stirred at -10 °C for 12 h (monitored by TLC). The solvent was removed in *vacuo* and the residue was purified by chromatography on silica gel using hexanes/EtOAc (6:1) as eluent to afford the desired products **5**.

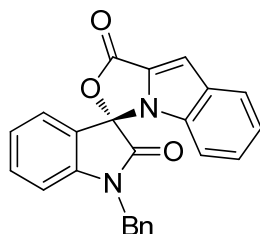

**(S)-1-benzyl-1'H-spiro[indoline-3,3'-oxazolo[3,4-a]indole]-1',2-dione (5a).** Yield 94%, white solid, m.p. 194–196°C,  $[\alpha]_D^{20} +7.000$  (1.00 mg/mL in CH<sub>2</sub>Cl<sub>2</sub>). <sup>1</sup>H NMR (400 MHz, CDCl<sub>3</sub>)  $\delta$  7.79 (d,  $J = 8.0$  Hz, 1H), 7.47 – 7.42 (m, 1H), 7.36 – 7.33 (m, 5H), 7.28 – 7.25 (m, 2H), 7.22 – 7.18 (m, 1H), 7.16 – 7.08 (m, 2H), 6.98 (d,  $J = 8.0$  Hz, 1H), 6.51 (d,  $J = 8.0$  Hz, 1H), 5.11 (d,  $J = 15.6$  Hz, 1H), 4.82 (d,  $J = 15.2$  Hz, 1H). <sup>13</sup>C NMR (100 MHz, CDCl<sub>3</sub>)  $\delta$  168.3, 159.3, 143.8, 134.5, 133.5, 133.2, 132.2, 129.1, 128.3, 127.7, 126.1, 125.9, 124.8, 124.4, 124.3, 122.4, 120.6, 110.7, 110.2, 103.2, 88.1, 44.7. HRMS (ESI): Exact mass calcd for C<sub>24</sub>H<sub>17</sub>N<sub>2</sub>O<sub>3</sub> [M+H]<sup>+</sup>: 381.1234, Found: 381.1245. HPLC (Chiralpak AD–H column, *n*-hexane/*i*-PrOH = 90/10, flow rate = 1.0 mL/min, retention time:  $t_{\text{minor}} = 60.971$  min,  $t_{\text{major}} = 67.970$  min, 90% ee).

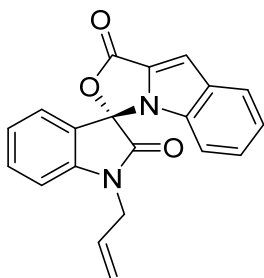

**(S)-1-allyl-1'*H*-spiro[indoline-3,3'-oxazolo[3,4-*a*]indole]-1',2-dione (5b).** Yield 94%, white solid, m.p. 168–170°C,  $[\alpha]_D^{20} +21.500$  (2.70 mg/mL in CH<sub>2</sub>Cl<sub>2</sub>). <sup>1</sup>H NMR (400 MHz, CDCl<sub>3</sub>)  $\delta$  7.80 – 7.76 (m, 1H), 7.56 – 7.52 (m, 1H), 7.28 (d,  $J = 7.2$  Hz, 1H), 7.24 (s, 1H), 7.22 – 7.17 (m, 2H), 7.14 (t,  $J = 7.6$  Hz, 1H), 7.08 (d,  $J = 8.0$  Hz, 1H), 6.62 (dd,  $J = 6.0, 3.2$  Hz, 1H), 5.92 – 5.83 (m, 1H), 5.40 – 5.33 (m, 2H), 4.49 – 4.33 (m, 2H). <sup>13</sup>C NMR (100 MHz, CDCl<sub>3</sub>)  $\delta$  167.8, 159.3, 143.9, 133.5, 133.2, 132.3, 130.3, 126.2, 126.1, 124.9, 124.4, 124.3, 122.4, 120.6, 119.1, 110.6, 110.0, 103.2, 88.1, 43.2. HRMS (ESI): Exact mass calcd for C<sub>20</sub>H<sub>15</sub>N<sub>2</sub>O<sub>3</sub> [M+H]<sup>+</sup>: 331.1077, Found: 331.1087. HPLC (Chiralpak AD–H column, *n*-hexane/*i*-PrOH = 90/10, flow rate = 1.0 mL/min, retention time:  $t_{\text{major}} = 37.469$  min,  $t_{\text{minor}} = 46.961$  min, 92% ee).

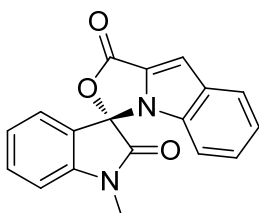

**(S)-1-methyl-1'*H*-spiro[indoline-3,3'-oxazolo[3,4-*a*]indole]-1',2-dione (5c).** Yield: 87%, white solid, m.p. 205–207°C,  $[\alpha]_D^{20} +20.000$  (2.10 mg/mL in CH<sub>2</sub>Cl<sub>2</sub>). <sup>1</sup>H NMR (400 MHz, CDCl<sub>3</sub>)  $\delta$  7.76 (d,  $J = 2.4$  Hz, 1H), 7.60 – 7.55 (m, 1H), 7.28 – 7.26 (m, 1H), 7.23 (s, 1H), 7.21 – 7.13 (m, 3H), 7.08 (d,  $J = 8.0$  Hz, 1H), 6.62 – 6.59 (m, 1H), 3.32 (s, 3H). <sup>13</sup>C NMR (100 MHz, CDCl<sub>3</sub>)  $\delta$  168.0, 159.3, 144.7, 133.6, 133.1, 132.2, 126.0, 126.0, 124.8, 124.3, 124.3, 122.4, 120.5, 110.0, 109.7, 103.1, 88.1, 27.0. HRMS (ESI): Exact mass calcd for C<sub>18</sub>H<sub>13</sub>N<sub>2</sub>O<sub>3</sub> [M+H]<sup>+</sup>: 305.0921, Found: 305.0929. HPLC (Chiralpak OD–H column, *n*-hexane/*i*-PrOH = 95/5, flow rate = 1.0 mL/min, retention time:  $t_{\text{minor}} = 34.650$  min,  $t_{\text{major}} = 40.478$  min, 89% ee).

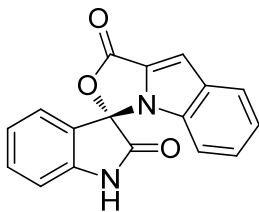

**(S)-1'-H-spiro[indoline-3,3'-oxazolo[3,4-a]indole]-1',2-dione (5d).** Yield: 79%, white solid, m.p. 319–321°C,  $[\alpha]_D^{20} +11.712$  (2.22 mg/mL in  $\text{CH}_2\text{Cl}_2$ ).  $^1\text{H}$  NMR (400 MHz,  $\text{CDCl}_3$ )  $\delta$  8.99 (br s, 1H), 7.79 – 7.77 (m, 1H), 7.50 – 7.46 (m, 1H), 7.25 (d,  $J = 3.6$  Hz, 2H), 7.22 – 7.16 (m, 2H), 7.12 (t,  $J = 7.6$  Hz, 1H), 7.05 (d,  $J = 8.0$  Hz, 1H), 6.69 – 6.67 (m, 1H).  $^{13}\text{C}$  NMR (100 MHz,  $\text{CDCl}_3$ )  $\delta$  170.2, 159.4, 141.7, 133.7, 133.1, 132.3, 126.4, 126.2, 124.6, 124.4, 124.3, 122.5, 120.6, 112.0, 110.2, 103.3, 88.4. HRMS (ESI): Exact mass calcd for  $\text{C}_{17}\text{H}_{11}\text{N}_2\text{O}_3$   $[\text{M}+\text{H}]^+$ : 291.0764, Found: 291.0768. HPLC (Chiralpak OJ column, *n*-hexane/*i*-PrOH = 96/4, flow rate = 1.0 mL/min, retention time:  $t_{\text{minor}} = 65.836$  min,  $t_{\text{major}} = 100.513$  min, 81% ee).

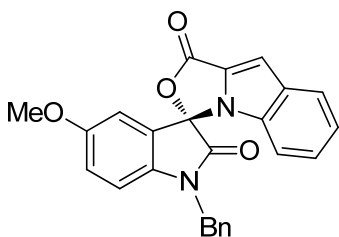

**(S)-1-benzyl-5-methoxy-1'-H-spiro[indoline-3,3'-oxazolo[3,4-a]indole]-1',2-dione (5e).** Yield 95%, white solid, m.p. 79–81°C,  $[\alpha]_D^{20} +17.200$  (2.50 mg/mL in  $\text{CH}_2\text{Cl}_2$ ).  $^1\text{H}$  NMR (400 MHz,  $\text{CDCl}_3$ )  $\delta$  7.79 (d,  $J = 8.0$  Hz, 1H), 7.34 (s, 5H), 7.25 (s, 1H), 7.23 – 7.13 (m, 2H), 6.96 (dd,  $J = 8.8, 2.4$  Hz, 1H), 6.88 (d,  $J = 8.8$  Hz, 1H), 6.85 (d,  $J = 2.4$  Hz, 1H), 6.55 (d,  $J = 8.4$  Hz, 1H), 5.08 (d,  $J = 15.6$  Hz, 1H), 4.79 (d,  $J = 15.6$  Hz, 1H), 3.67 (s, 3H).  $^{13}\text{C}$  NMR (100 MHz,  $\text{CDCl}_3$ )  $\delta$  168.1, 159.3, 157.0, 136.7, 134.6, 133.2, 132.2, 129.0, 128.3, 127.7, 125.9, 124.7, 124.3, 122.4, 121.6, 118.6, 112.1, 111.6, 110.3, 103.1, 88.4, 55.8, 44.8. HRMS (ESI): Exact mass calcd for  $\text{C}_{25}\text{H}_{19}\text{N}_2\text{O}_4$   $[\text{M}+\text{H}]^+$ : 411.1339, Found: 411.1345. HPLC (Chiralpak AD–H column, *n*-hexane/*i*-PrOH = 90/10, flow rate = 1.0 mL/min, retention time:  $t_{\text{minor}} = 36.245$  min,  $t_{\text{major}} = 43.935$  min, 91% ee).

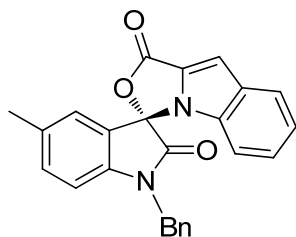

**(S)-1-benzyl-5-methyl-1'H-spiro[indoline-3,3'-oxazolo[3,4-a]indole]-1',2-dione (5f).** Yield 86%, white solid, m.p. 126–128°C,  $[\alpha]_D^{20} +18.667$  (1.50 mg/mL in  $\text{CH}_2\text{Cl}_2$ ).  $^1\text{H}$  NMR (400 MHz,  $\text{CDCl}_3$ )  $\delta$  7.79 (d,  $J = 8.0$  Hz, 1H), 7.35 – 7.32 (m, 5H), 7.25 (s, 1H), 7.22 – 7.18 (m, 2H), 7.16 – 7.12 (m, 1H), 7.09 (s, 1H), 6.86 (d,  $J = 8.0$  Hz, 1H), 6.54 (d,  $J = 8.4$  Hz, 1H), 5.08 (d,  $J = 15.2$  Hz, 1H), 4.80 (d,  $J = 15.2$  Hz, 1H), 2.23 (s, 3H).  $^{13}\text{C}$  NMR (100 MHz,  $\text{CDCl}_3$ )  $\delta$  168.2, 159.4, 141.3, 134.7, 134.2, 133.7, 133.2, 132.2, 129.0, 128.3, 127.7, 126.6, 125.9, 124.8, 124.3, 122.4, 120.5, 110.5, 110.3, 103.0, 88.3, 44.7, 20.8. HRMS (ESI): Exact mass calcd for  $\text{C}_{25}\text{H}_{19}\text{N}_2\text{O}_3$   $[\text{M}+\text{H}]^+$ : 395.1390, Found: 395.1398. HPLC (Chiralpak AD–H column, *n*-hexane/*i*-PrOH = 90/10, flow rate = 1.0 mL/min, retention time:  $t_{\text{minor}} = 51.752$  min,  $t_{\text{major}} = 58.528$  min, 89% ee).

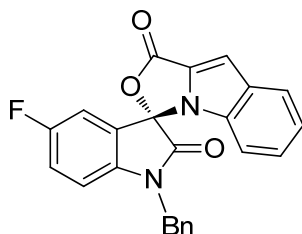

**(S)-1-benzyl-5-fluoro-1'H-spiro[indoline-3,3'-oxazolo[3,4-a]indole]-1',2-dione (5g).** Yield 89%, white solid, m.p. 138–139°C,  $[\alpha]_D^{20} +8.065$  (3.10 mg/mL in  $\text{CH}_2\text{Cl}_2$ ).  $^1\text{H}$  NMR (400 MHz,  $\text{CDCl}_3$ )  $\delta$  7.80 (d,  $J = 8.0$  Hz, 1H), 7.35 (s, 5H), 7.25 – 7.13 (m, 4H), 7.03 (dd,  $J = 6.8$ , 2.4 Hz 1H), 6.92 (dd,  $J = 8.4$ , 4.0 Hz, 1H), 6.53 (d,  $J = 8.0$  Hz, 1H), 5.11 (d,  $J = 15.2$  Hz, 1H), 4.81 (d,  $J = 15.6$  Hz, 1H).  $^{13}\text{C}$  NMR (100 MHz,  $\text{CDCl}_3$ )  $\delta$  168.2, 159.6 (d,  $J = 244.4$  Hz), 158.9, 139.6, 134.2, 133.2, 132.2, 129.2, 128.5, 127.7, 126.2, 124.5 (d,  $J = 14.4$  Hz), 122.6, 122.2 (d,  $J = 7.6$  Hz), 120.0 (d,  $J = 23.4$  Hz), 114.1 (d,  $J = 25.1$  Hz), 111.8 (d,  $J = 7.6$  Hz), 110.1, 103.6, 87.7, 44.9.  $^{19}\text{F}$  NMR (376 MHz,  $\text{CDCl}_3$ )  $\delta$  116.8. HRMS (ESI): Exact mass calcd for  $\text{C}_{24}\text{H}_{16}\text{FN}_2\text{O}_3$   $[\text{M}+\text{H}]^+$ : 399.1139, Found: 399.1143. HPLC (Chiralpak AD–H column, *n*-hexane/*i*-PrOH = 90/10, flow rate = 1.0 mL/min, retention time:  $t_{\text{minor}} = 76.054$  min,  $t_{\text{major}} = 86.255$  min, 95% ee).

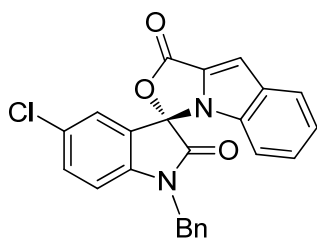

**(S)-1-benzyl-5-chloro-1'H-spiro[indoline-3,3'-oxazolo[3,4-a]indole]-1',2-dione (5h).** Yield 77%, white solid, m.p. 173–175°C,  $[\alpha]_D^{20} +21.250$  (3.20 mg/mL in  $\text{CH}_2\text{Cl}_2$ ).  $^1\text{H}$  NMR (400 MHz,  $\text{CDCl}_3$ )  $\delta$  7.81 (d,  $J = 8.0$  Hz, 1H), 7.41 (dd,  $J = 8.4, 2.4$  Hz, 1H), 7.37 – 7.32 (m, 5H), 7.27 – 7.16 (m, 4H), 6.91 (d,  $J = 8.4$  Hz, 1H), 6.53 (dd,  $J = 8.0, 0.8$  Hz, 1H), 5.11 (d,  $J = 15.6$  Hz, 1H), 4.81 (d,  $J = 15.6$  Hz, 1H).  $^{13}\text{C}$  NMR (100 MHz,  $\text{CDCl}_3$ )  $\delta$  168.0, 158.8, 142.2, 134.1, 133.4, 133.3, 132.2, 130.0, 129.2, 128.5, 127.7, 126.4, 126.2, 124.5, 124.5, 122.6, 122.3, 111.9, 110.1, 103.6, 87.6, 44.9. HRMS (ESI): Exact mass calcd for  $\text{C}_{24}\text{H}_{16}\text{ClN}_2\text{O}_3$   $[\text{M}+\text{H}]^+$ : 415.0844, Found: 415.0852. HPLC (Chiralpak AD–H column, *n*-hexane/*i*-PrOH = 90/10, flow rate = 1.0 mL/min, retention time:  $t_{\text{major}} = 35.290$  min,  $t_{\text{minor}} = 40.449$  min, 92% ee).

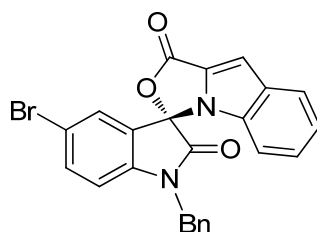

**(S)-1-benzyl-5-bromo-1'H-spiro[indoline-3,3'-oxazolo[3,4-a]indole]-1',2-dione (5i).** Yield 76%, white solid, m.p. 204–206°C,  $[\alpha]_D^{20} +22.400$  (2.50 mg/mL in  $\text{CH}_2\text{Cl}_2$ ).  $^1\text{H}$  NMR (400 MHz,  $\text{CDCl}_3$ )  $\delta$  7.81 (d,  $J = 8.0$  Hz, 1H), 7.56 (dd,  $J = 8.0, 2.0$  Hz, 1H), 7.40 (d,  $J = 2.0$  Hz, 1H), 7.37 – 7.32 (m, 5H), 7.27 – 7.16 (m, 3H), 6.86 (d,  $J = 8.4$  Hz, 1H), 6.53 (d,  $J = 8.4$  Hz, 1H), 5.10 (d,  $J = 15.2$  Hz, 1H), 4.80 (d,  $J = 15.6$  Hz, 1H).  $^{13}\text{C}$  NMR (100 MHz,  $\text{CDCl}_3$ )  $\delta$  167.8, 158.8, 142.7, 136.3, 134.1, 133.2, 132.2, 129.2, 128.5, 127.7, 126.2, 124.5, 124.5, 122.6, 122.6, 117.0, 112.3, 110.1, 103.6, 87.5, 44.8. HRMS (ESI): Exact mass calcd for  $\text{C}_{24}\text{H}_{16}\text{BrN}_2\text{O}_3$   $[\text{M}+\text{H}]^+$ : 459.0339, Found: 459.0350. HPLC (Chiralpak AD–H column, *n*-hexane/*i*-PrOH = 90/10, flow rate = 1.0 mL/min, retention time:  $t_{\text{major}} = 35.104$  min,  $t_{\text{minor}} = 43.441$  min, 91% ee).



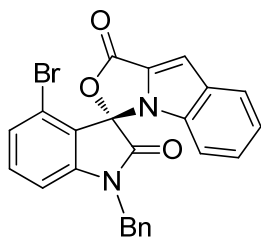

**(S)-1-benzyl-4-bromo-1'H-spiro[indoline-3,3'-oxazolo[3,4- $\alpha$ ]indole]-1',2-dione (5j).** Yield 84%, white solid, m.p. 209–211°C,  $[\alpha]_D^{20}$  +5.814 (4.30 mg/mL in CH<sub>2</sub>Cl<sub>2</sub>). <sup>1</sup>H NMR (400 MHz, CDCl<sub>3</sub>)  $\delta$  7.80 (d,  $J$  = 8.0 Hz, 1H), 7.36 – 7.30 (m, 5H), 7.28 – 7.23 (m, 2H), 7.21 (t,  $J$  = 7.2 Hz, 1H), 7.17 – 7.14 (m, 2H), 6.93 (d,  $J$  = 8.0 Hz, 1H), 6.52 (d,  $J$  = 8.4 Hz, 1H), 5.12 (d,  $J$  = 15.6 Hz, 1H), 4.85 (d,  $J$  = 15.6 Hz, 1H). <sup>13</sup>C NMR (100 MHz, CDCl<sub>3</sub>)  $\delta$  167.7, 159.2, 145.6, 134.4, 134.2, 133.0, 132.0, 129.2, 128.5, 128.1, 127.6, 126.0, 125.1, 124.5, 122.4, 121.4, 119.1, 109.7, 109.6, 103.3, 88.2, 44.8. HRMS (ESI): Exact mass calcd for C<sub>24</sub>H<sub>16</sub>BrN<sub>2</sub>O<sub>3</sub> [M+H]<sup>+</sup>: 459.0339, Found: 459.0345. HPLC (Chiralpak AD–H column, *n*-hexane/*i*-PrOH = 90/10, flow rate = 1.0 mL/min, retention time:  $t_{\text{major}}$  = 55.242 min,  $t_{\text{minor}}$  = 60.951 min, 98% ee).

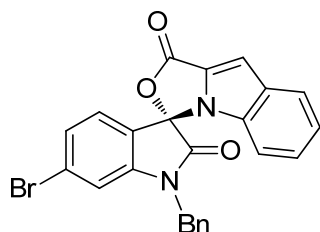

**(S)-1-benzyl-6-bromo-1'H-spiro[indoline-3,3'-oxazolo[3,4- $\alpha$ ]indole]-1',2-dione (5k).** Yield 97%, white solid, m.p. 179–181°C,  $[\alpha]_D^{20}$  +8.056 (3.60 mg/mL in CH<sub>2</sub>Cl<sub>2</sub>). <sup>1</sup>H NMR (400 MHz, CDCl<sub>3</sub>)  $\delta$  7.80 (d,  $J$  = 8.0 Hz, 1H), 7.45 – 7.33 (m, 5H), 7.28 – 7.24 (m, 2H), 7.22 – 7.13 (m, 4H), 6.53 (d,  $J$  = 8.4 Hz, 1H), 5.09 (d,  $J$  = 15.6 Hz, 1H), 4.79 (d,  $J$  = 15.6 Hz, 1H). <sup>13</sup>C NMR (100 MHz, CDCl<sub>3</sub>)  $\delta$  168.2, 159.0, 145.0, 134.0, 133.2, 132.2, 129.3, 128.6, 127.7, 127.6, 127.4, 127.344, 126.2, 124.6, 124.5, 122.6, 119.5, 114.3, 110.1, 103.6, 87.6, 44.9. HRMS (ESI): Exact mass calcd for C<sub>24</sub>H<sub>16</sub>BrN<sub>2</sub>O<sub>3</sub> [M+H]<sup>+</sup>: 459.0339, Found: 459.0344. HPLC (Chiralpak AD–H column, *n*-hexane/*i*-PrOH = 90/10, flow rate = 1.0 mL/min, retention time:  $t_{\text{major}}$  = 38.879 min,  $t_{\text{minor}}$  = 46.936 min, 93% ee).

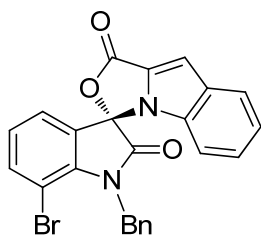

**(S)-1-benzyl-7-bromo-1'H-spiro[indoline-3,3'-oxazolo[3,4-a]indole]-1',2-dione (5l).** Yield 60%, white solid, m.p. 204–206°C,  $[\alpha]_D^{20}$   $-4.516$  (3.10 mg/mL in  $\text{CH}_2\text{Cl}_2$ ).  $^1\text{H}$  NMR (400 MHz,  $\text{CDCl}_3$ )  $\delta$  7.79 (dd,  $J = 6.4, 2.4$  Hz, 1H), 7.62 (dd,  $J = 8.4, 1.2$  Hz, 1H), 7.33 – 7.28 (m, 5H), 7.26 – 7.17 (m, 4H), 6.99 (dd,  $J = 8.0, 7.6$  Hz, 1H), 6.61 – 6.59 (m, 1H), 5.51 (d,  $J = 16.0$  Hz, 1H), 5.42 (d,  $J = 16.4$  Hz, 1H).  $^{13}\text{C}$  NMR (100 MHz,  $\text{CDCl}_3$ )  $\delta$  169.3, 158.9, 141.5, 139.4, 135.9, 133.2, 132.2, 128.8, 127.8, 126.9, 126.2, 125.6, 125.4, 124.6, 124.5, 124.0, 122.6, 110.2, 104.0, 103.6, 87.0, 45.4. HRMS (ESI): Exact mass calcd for  $\text{C}_{24}\text{H}_{16}\text{BrN}_2\text{O}_3$   $[\text{M}+\text{H}]^+$ : 459.0339, Found: 459.0342. HPLC (Chiralpak AD–H column, *n*-hexane/*i*-PrOH = 80/20, flow rate = 1.0 mL/min, retention time:  $t_{\text{minor}} = 16.816$  min,  $t_{\text{major}} = 33.712$  min, 95% ee).

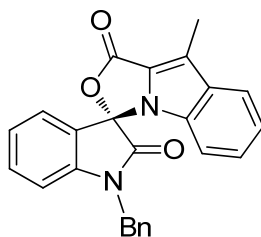

**(S)-1-benzyl-9'-methyl-1'H-spiro[indoline-3,3'-oxazolo[3,4-a]indole]-1',2-dione (5m).** Yield 79%, white solid, m.p. 181–183°C,  $[\alpha]_D^{20}$   $+11.538$  (2.60 mg/mL in  $\text{CH}_2\text{Cl}_2$ ).  $^1\text{H}$  NMR (400 MHz,  $\text{CDCl}_3$ )  $\delta$  7.73 (d,  $J = 8.0$  Hz, 1H), 7.45 – 7.41 (m, 1H), 7.35 – 7.34 (m, 5H), 7.28 (dd,  $J = 7.2, 0.8$  Hz, 1H), 7.21 – 7.07 (m, 3H), 6.96 (d,  $J = 7.6$  Hz, 1H), 6.47 (d,  $J = 8.4$  Hz, 1H), 5.09 (d,  $J = 15.2$  Hz, 1H), 4.82 (d,  $J = 15.6$  Hz, 1H), 2.64 (s, 3H).  $^{13}\text{C}$  NMR (100 MHz,  $\text{CDCl}_3$ )  $\delta$  168.7, 159.8, 143.7, 134.6, 133.7, 133.3, 132.1, 129.0, 128.3, 127.6, 126.1, 126.0, 124.2, 122.4, 121.6, 121.5, 121.0, 115.8, 110.6, 110.2, 87.8, 44.6, 8.7. HRMS (ESI): Exact mass calcd for  $\text{C}_{25}\text{H}_{19}\text{N}_2\text{O}_3$   $[\text{M}+\text{H}]^+$ : 395.1390, Found: 395.1399. HPLC (Chiralpak AD–H column, *n*-hexane/*i*-PrOH = 70/30, flow rate = 1.0 mL/min, retention time:  $t_{\text{minor}} = 9.828$  min,  $t_{\text{major}} = 13.057$  min, 90% ee).

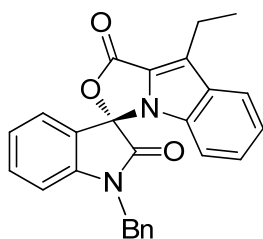

**(S)-1-benzyl-9'-ethyl-1'H-spiro[indoline-3,3'-oxazolo[3,4-a]indole]-1',2-dione (5n).** Yield 98%, white solid, m.p. 193–195°C,  $[\alpha]_D^{20} +11.786$  (2.80 mg/mL in  $\text{CH}_2\text{Cl}_2$ ).  $^1\text{H}$  NMR (400 MHz,  $\text{CDCl}_3$ )  $\delta$  7.77 (d,  $J = 8.0$  Hz, 1H), 7.45 – 7.40 (m, 1H), 7.35 – 7.34 (m, 5H), 7.29 (dd,  $J = 7.6, 0.8$  Hz, 1H), 7.19 – 7.07 (m, 3H), 6.96 (d,  $J = 8.0$  Hz, 1H), 6.47 (d,  $J = 8.4$  Hz, 1H), 5.10 (d,  $J = 15.2$  Hz, 1H), 4.81 (d,  $J = 15.6$  Hz, 1H), 3.14 – 3.08 (m, 2H), 1.48 (t,  $J = 7.6$  Hz, 3H).  $^{13}\text{C}$  NMR (100 MHz,  $\text{CDCl}_3$ )  $\delta$  168.7, 159.7, 143.7, 134.6, 133.2, 132.9, 132.1, 129.0, 128.3, 127.7, 126.1, 125.9, 124.2, 122.7, 122.6, 121.6, 121.0, 121.0, 110.6, 110.2, 87.8, 44.6, 17.6, 14.9. HRMS (ESI): Exact mass calcd for  $\text{C}_{26}\text{H}_{21}\text{N}_2\text{O}_3$   $[\text{M}+\text{H}]^+$ : 409.1547, Found: 409.1558. HPLC (Chiralpak AD–H column, *n*-hexane/*i*-PrOH = 70/30, flow rate = 1.0 mL/min, retention time:  $t_{\text{minor}} = 8.304$  min,  $t_{\text{major}} = 10.102$  min, 93% ee).

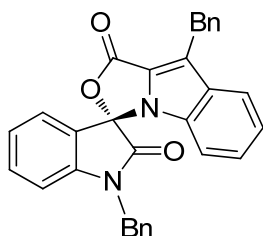

**(S)-1,9'-dibenzyl-1'H-spiro[indoline-3,3'-oxazolo[3,4-a]indole]-1',2-dione (5o).** Yield 96%, white solid, m.p. 124–126°C,  $[\alpha]_D^{20} +9.474$  (1.90 mg/mL in  $\text{CH}_2\text{Cl}_2$ ).  $^1\text{H}$  NMR (400 MHz,  $\text{CDCl}_3$ )  $\delta$  7.64 – 7.62 (m, 1H), 7.45 – 7.39 (m, 3H), 7.35 – 7.24 (m, 8H), 7.21 – 7.17 (m, 1H), 7.12 – 7.07 (m, 3H), 6.96 (d,  $J = 8.0$  Hz, 1H), 6.48 – 6.46 (m, 1H), 5.10 (d,  $J = 15.6$  Hz, 1H), 4.81 (d,  $J = 15.2$  Hz, 1H), 4.48 (d,  $J = 15.6$  Hz, 1H), 4.42 (d,  $J = 15.2$  Hz, 1H).  $^{13}\text{C}$  NMR (100 MHz,  $\text{CDCl}_3$ )  $\delta$  168.5, 159.7, 143.8, 139.6, 134.6, 133.3, 132.9, 132.4, 129.1, 128.7, 128.6, 128.3, 127.7, 126.3, 126.2, 126.0, 124.2, 122.9, 121.9, 120.8, 118.7, 110.7, 110.3, 88.0, 44.7, 30.1. HRMS (ESI): Exact mass calcd for  $\text{C}_{31}\text{H}_{23}\text{N}_2\text{O}_3$   $[\text{M}+\text{H}]^+$ : 471.1703, Found: 471.1712. HPLC (Chiralpak AD–H column, *n*-hexane/*i*-PrOH = 80/20, flow rate = 1.0 mL/min, retention time:  $t_{\text{major}} = 21.576$  min,  $t_{\text{minor}} = 23.632$  min, 93% ee).

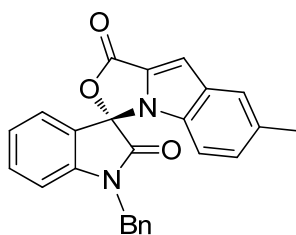

**(S)-1-benzyl-7'-methyl-1'H-spiro[indoline-3,3'-oxazolo[3,4-a]indole]-1',2-dione (5p).**

Yield 69%, white solid, m.p. 185–187°C,  $[\alpha]_D^{20} +11.765$  (1.70 mg/mL in  $\text{CH}_2\text{Cl}_2$ ).  $^1\text{H}$  NMR (400 MHz,  $\text{CDCl}_3$ )  $\delta$  7.56 (s, 1H), 7.46 – 7.41 (m, 1H), 7.36 – 7.35 (m, 5H), 7.27 (d,  $J = 0.4$  Hz, 1H), 7.16 (d,  $J = 0.4$  Hz, 1H), 7.11 – 7.07 (m, 1H), 6.97 (d,  $J = 8.0$  Hz, 2H), 6.41 (d,  $J = 8.4$  Hz, 1H), 5.11 (d,  $J = 15.6$  Hz, 1H), 4.81 (d,  $J = 15.6$  Hz, 1H), 2.41 (s, 3H).  $^{13}\text{C}$  NMR (100 MHz,  $\text{CDCl}_3$ )  $\delta$  168.4, 159.4, 143.7, 134.6, 133.5, 133.4, 132.0, 130.7, 129.1, 128.3, 127.9, 127.6, 126.1, 124.8, 124.2, 123.6, 120.7, 110.7, 109.8, 102.6, 88.1, 44.7, 21.4. HRMS (ESI): Exact mass calcd for  $\text{C}_{25}\text{H}_{19}\text{N}_2\text{O}_3$   $[\text{M}+\text{H}]^+$ : 395.1390, Found: 395.1394. HPLC (Chiralpak AD–H column, *n*-hexane/*i*-PrOH = 90/10, flow rate = 1.0 mL/min, retention time:  $t_{\text{major}} = 66.593$  min,  $t_{\text{minor}} = 87.849$  min, 84% ee).

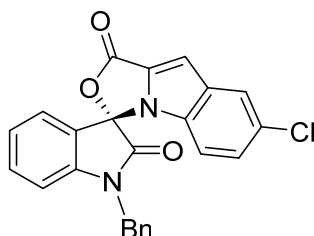

**(S)-1-benzyl-7'-chloro-1'H-spiro[indoline-3,3'-oxazolo[3,4-a]indole]-1',2-dione (5q).**

Yield 59%, white solid, mp 182–183.7 °C,  $[\alpha]_D^{20} +122$  (10 mg/mL in  $\text{CH}_2\text{Cl}_2$ ).  $^1\text{H}$  NMR (400 MHz,  $\text{CDCl}_3$ )  $\delta$  7.77 (s, 1H), 7.47 (d,  $J = 8.0$  Hz, 1H), 7.35 (m, 5H), 7.28 – 7.26 (m, 1H), 7.19 (s, 1H), 7.14 – 7.07 (m, 2H), 7.00 (d,  $J = 8.0$  Hz, 1H), 6.41 (d,  $J = 8.8$  Hz, 1H), 5.12 (d,  $J = 15.2$  Hz, 1H), 4.81 (d,  $J = 15.6$  Hz, 1H).  $^{13}\text{C}$  NMR (100 MHz,  $\text{CDCl}_3$ )  $\delta$  168.0, 158.8, 143.8, 134.5, 134.0, 133.7, 129.2, 128.5, 128.4, 127.7, 126.6, 126.1, 124.4, 123.6, 120.3, 111.2, 110.9, 102.5, 88.2, 44.8. HRMS (ESI): Exact mass calcd for  $\text{C}_{24}\text{H}_{16}\text{ClN}_2\text{O}_3$   $[\text{M}+\text{H}]^+$ : 415.0844, Found: 415.0848. HPLC (Chiralpak IA column, *n*-hexane/PrOH = 85/15, flow rate = 0.5 mL/min, retention time:  $t_{\text{major}} = 52.448$  min,  $t_{\text{minor}} = 67.889$  min, 90% ee).

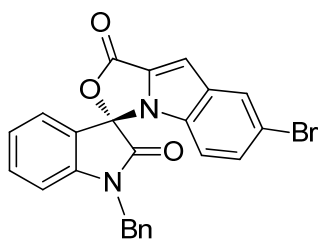

**(S)-1-benzyl-7'-bromo-1'H-spiro[indoline-3,3'-oxazolo[3,4-a]indole]-1',2-dione (5r).**

Yield 41%, white solid, m.p. 170–172 °C,  $[\alpha]_D^{20} +12.857$  (2.10 mg/mL in  $\text{CH}_2\text{Cl}_2$ ).  $^1\text{H}$  NMR (400 MHz,  $\text{CDCl}_3$ )  $\delta$  7.94 (d,  $J = 1.6$  Hz, 1H), 7.49 – 7.45 (m, 1H), 7.36 – 7.35 (m, 5H), 7.28 (d,  $J = 0.04$  Hz, 1H), 7.22 – 7.18 (m, 1H), 7.18 (s, 1H), 7.14 – 7.10 (m, 1H), 7.00 (d,  $J = 8.0$  Hz, 1H), 6.36 (d,  $J = 8.8$  Hz, 1H), 5.12 (d,  $J = 15.2$  Hz, 1H), 4.81 (d,  $J = 15.6$  Hz, 1H).  $^{13}\text{C}$  NMR (100 MHz,  $\text{CDCl}_3$ )  $\delta$  168.0, 158.8, 143.7, 134.6, 134.4, 133.7, 130.7, 129.1, 129.0, 128.5, 127.7, 126.8, 126.1, 125.9, 124.4, 120.2, 115.8, 111.5, 110.8, 102.3, 88.2, 44.8. HRMS (ESI): Exact mass calcd for  $\text{C}_{24}\text{H}_{16}\text{BrN}_2\text{O}_3$   $[\text{M}+\text{H}]^+$ : 459.0339, Found: 459.0345. HPLC (Chiralpak AD–H column, *n*-hexane/PrOH = 90/10, flow rate = 1.0 mL/min, retention time:  $t_{\text{major}} = 82.805$  min,  $t_{\text{minor}} = 92.921$  min, 93% ee).

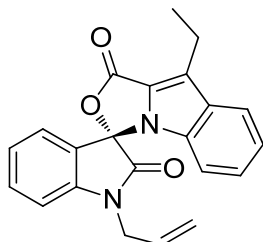

**(S)-1-allyl-9'-ethyl-1'H-spiro[indoline-3,3'-oxazolo[3,4-a]indole]-1',2-dione (5s).**

Yield 97%, white solid, m.p. 124–126 °C,  $[\alpha]_D^{20} +15.714$  (2.80 mg/mL in  $\text{CH}_2\text{Cl}_2$ ).  $^1\text{H}$  NMR (400 MHz,  $\text{CDCl}_3$ )  $\delta$  7.77 – 7.75 (m, 1H), 7.52 (t,  $J = 8.0$  Hz, 1H), 7.30 (d,  $J = 7.6$  Hz, 1H), 7.18 – 7.11 (m, 3H), 7.06 (d,  $J = 8.0$  Hz, 1H), 6.58 – 6.55 (m, 1H), 5.92 – 5.82 (m, 1H), 5.39 – 5.32 (m, 2H), 4.45 (dd,  $J = 16.4, 4.8$  Hz, 1H), 4.35 (dd,  $J = 16.4, 5.6$  Hz, 1H), 3.15 – 3.05 (m, 2H), 1.47 (t,  $J = 7.6$  Hz, 3H).  $^{13}\text{C}$  NMR (100 MHz,  $\text{CDCl}_3$ )  $\delta$  168.1, 159.6, 143.9, 133.3, 132.9, 132.1, 130.3, 126.1, 126.0, 124.1, 122.6, 122.6, 121.5, 121.0, 121.0, 118.9, 110.5, 110.0, 87.7, 43.1, 17.6, 14.9. HRMS (ESI): Exact mass calcd for  $\text{C}_{22}\text{H}_{19}\text{N}_2\text{O}_3$   $[\text{M}+\text{H}]^+$ : 359.1390, Found: 359.1395. HPLC (Chiralpak AD–H column, *n*-hexane/ *i*-PrOH = 70/30, flow rate = 1.0 mL/min, retention time:  $t_{\text{minor}} = 12.810$  min,  $t_{\text{major}} = 22.446$  min, 94% ee).

#### 4. General procedure for NHC-catalyzed annulation of indole-2-formaldehydes with 3-methyl-1-phenyl-1H-pyrazole-4,5-dione

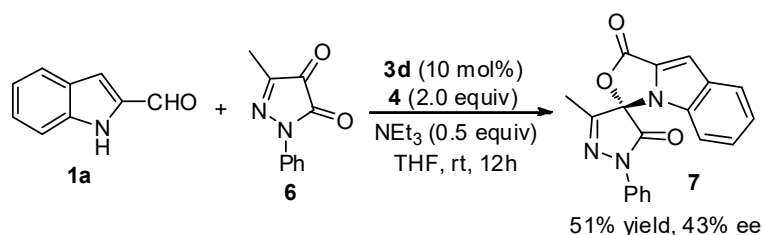

To a dry Schlenk tube with a magnetic stirring bar was charged 1*H*-indole-2-carbaldehyde (**1a**) (0.2 mmol), 3-methyl-1-phenyl-1*H*-pyrazole-4,5-dione (**6**) (0.1 mmol), NHC precatalyst **3d** (0.01 mmol, 4.6 mg), and quinone **4** (0.2 mmol, 81.8 mg), a solution of Et<sub>3</sub>N (0.05 mmol) in dry THF (1 mL) was added under nitrogen atmosphere. The reaction mixture was stirred at room temperature for 12 h (monitored by TLC). The solvent was removed in *vacuo* and the residue was purified by chromatography on silica gel using hexanes/EtOAc (6:1) as eluent to afford the desired product **7**.

(*S*)-3'-methyl-1'-phenyl-1*H*-spiro[oxazolo[3,4-*a*]indole-3,4'-pyrazole]-1,5'(1'*H*)-dione (**7**). Yield 51%, white solid, m.p. 129.5–130.2°C, [ $\alpha$ ]<sub>D</sub><sup>20</sup> –107.00 (10 mg/mL in CH<sub>2</sub>Cl<sub>2</sub>). <sup>1</sup>H NMR (400 MHz, CDCl<sub>3</sub>)  $\delta$  7.94 – 7.91 (m, 2H), 7.83 (d, *J* = 8.4 Hz, 1H), 7.50 – 7.46 (m, 2H), 7.39 – 7.35 (m, 1H), 7.32 – 7.28 (m, 3H), 7.04 (dd, *J* = 8.4, 0.8 Hz, 1H), 2.09 (s, 3H). <sup>13</sup>C NMR (100 MHz, CDCl<sub>3</sub>)  $\delta$  162.4, 157.9, 154.1, 136.9, 133.1, 132.1, 129.2, 127.2, 126.3, 124.7, 123.2, 122.8, 118.6, 109.5, 104.7, 87.3, 12.2. HRMS (ESI): Exact mass calcd for C<sub>19</sub>H<sub>13</sub>N<sub>3</sub>O<sub>3</sub> [M+H]<sup>+</sup>: 332.1030, Found: 332.1039. HPLC (Chiralpak AD–H column, *n*-hexane/*i*-PrOH = 90/10, flow rate = 1.0 mL/min, retention time: *t*<sub>major</sub> = 12.980 min, *t*<sub>minor</sub> = 15.910 min, 43% ee).

#### 5. References

- (1) Struble J. R.; Bode, J. W. *Org. Synth.* **2010**, *87*, 362.
- (2) Vora, H. U.; Lathrop, S. P.; Reynolds, N. T.; Kerr, M. S.; Read de Alaniz, J.; Rovis, T. *Org. Synth.* **2010**, *87*, 350.
- (3) Zhao, C.; Li, F.; Wang, J. *Angew. Chem., Int. Ed.* **2016**, *55*, 1820
- (4) Kerr, M. S.; Read de Alaniz, J.; Rovis, T. *J. Org. Chem.* **2005**, *70*, 5725.
- (5) Zheng, C.; Lu, Y.; Zhang, J.; Chen, X.; Chai, Z.; Ma, W.; Zhao, G. *Chem. Eur. J.* **2010**, *16*, 5853.

## 6. NMR spectra of the compounds 5a–5s and 7

$^1\text{H}$  NMR spectrum of compound **5a** ( $\text{CDCl}_3$ , 400 MHz)

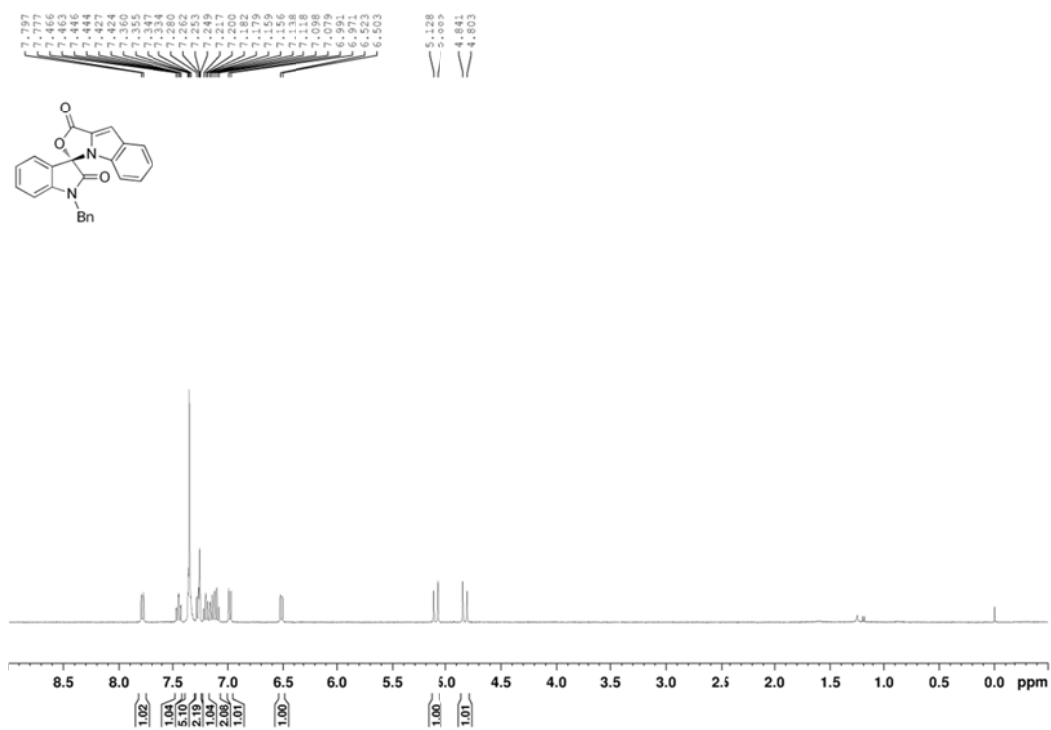

$^{13}\text{C}$  NMR spectrum of compound **5a** ( $\text{CDCl}_3$ , 100 MHz)

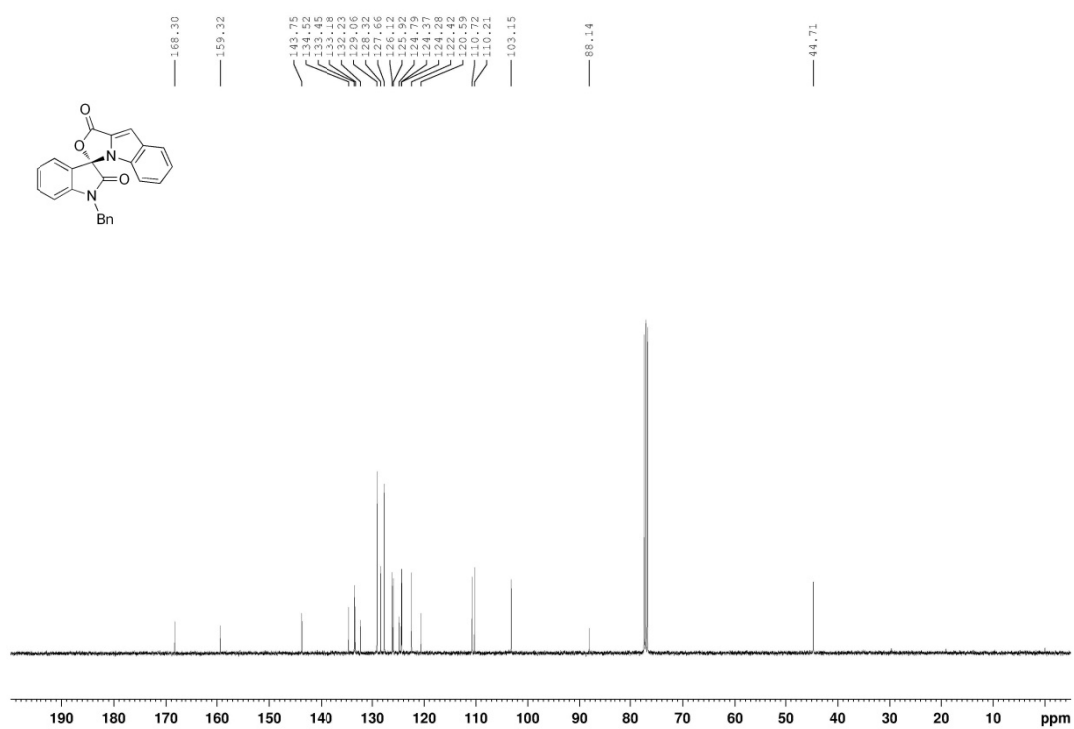

$^1\text{H}$  NMR spectrum of compound **5b** ( $\text{CDCl}_3$ , 400 MHz)

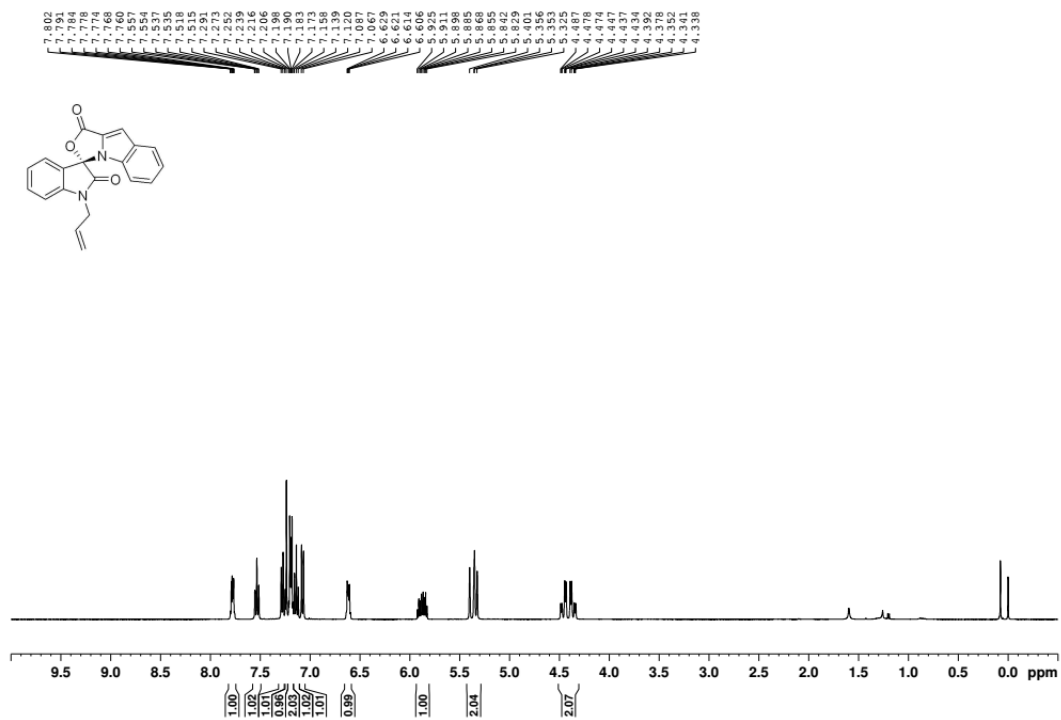

$^{13}\text{C}$  NMR spectrum of compound **5b** ( $\text{CDCl}_3$ , 100 MHz)

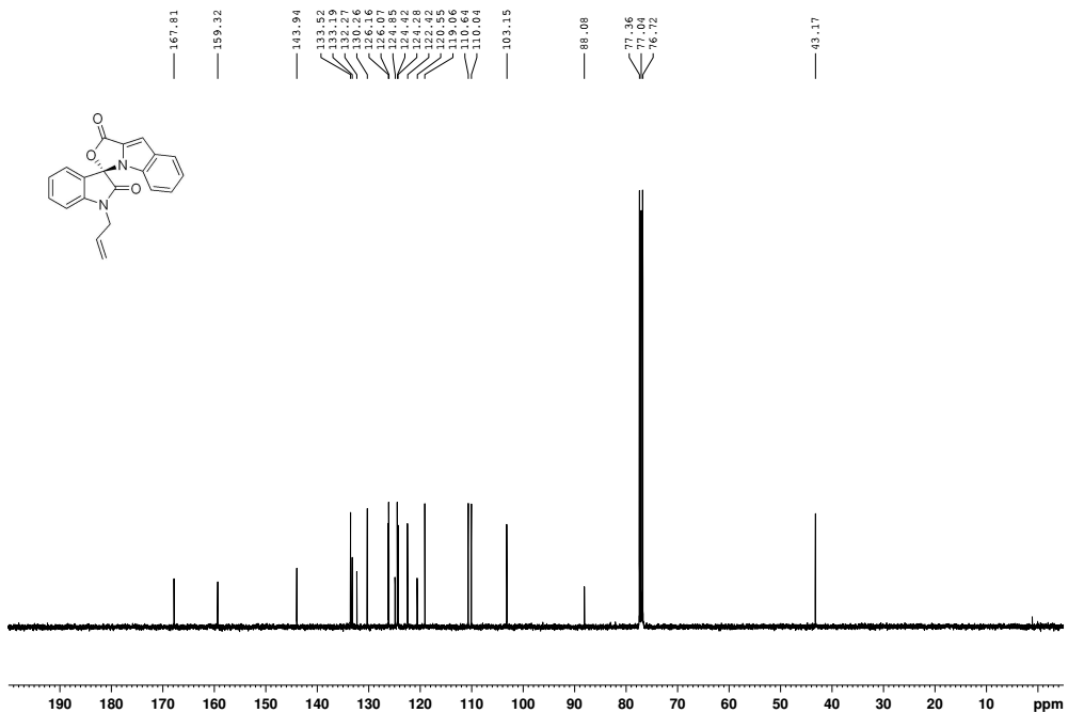





$^1\text{H}$  NMR spectrum of compound **5d** ( $\text{CDCl}_3$ , 400 MHz)

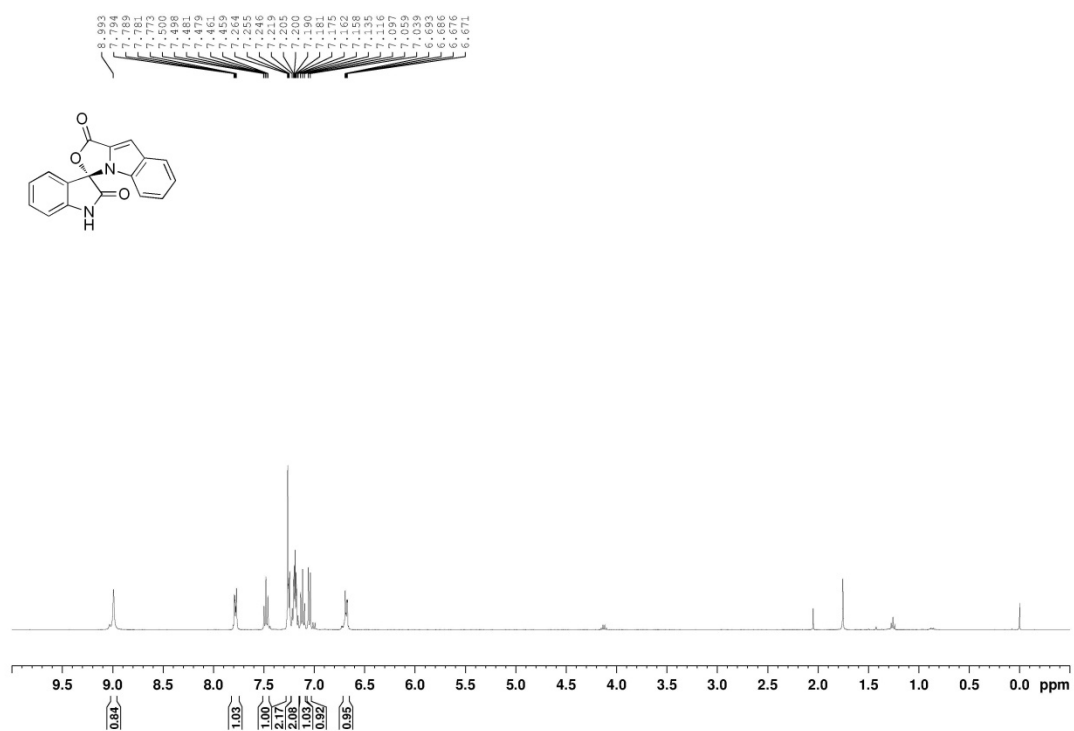

$^{13}\text{C}$  NMR spectrum of compound **5d** ( $\text{CDCl}_3$ , 100 MHz)

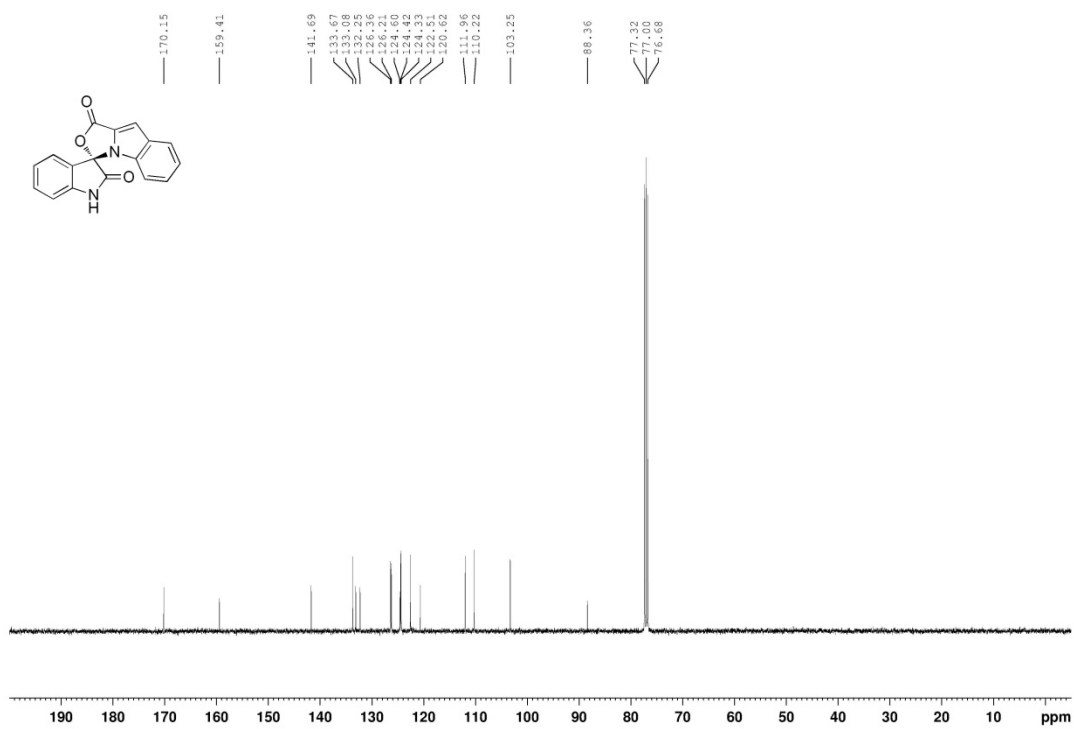

<sup>1</sup>H NMR spectrum of compound **5e** (CDCl<sub>3</sub>, 400 MHz)

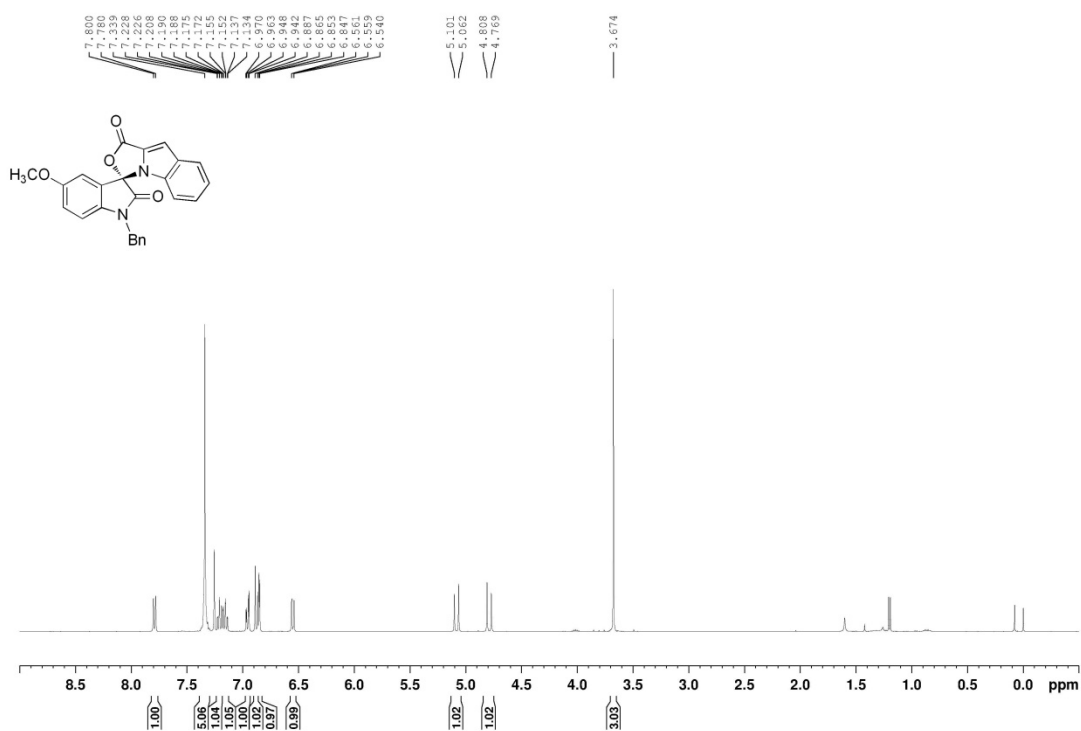

<sup>13</sup>C NMR spectrum of compound **5e** (CDCl<sub>3</sub>, 100 MHz)

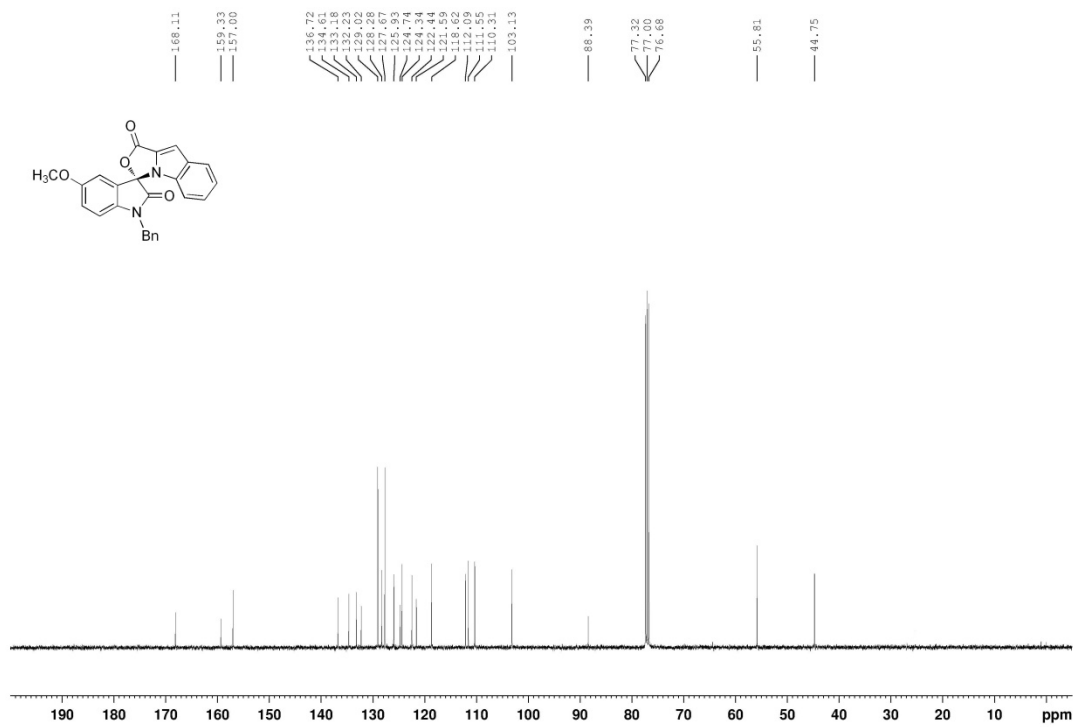



<sup>1</sup>H NMR spectrum of compound **5g** (CDCl<sub>3</sub>, 400 MHz)

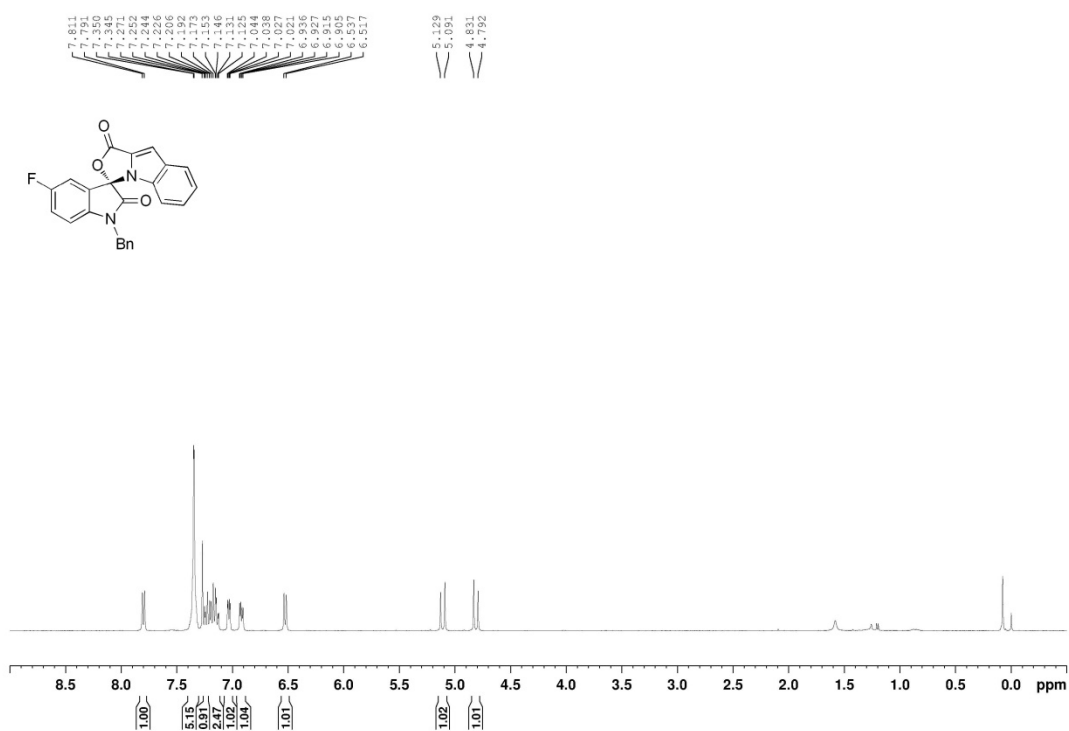

<sup>13</sup>C NMR spectrum of compound **5g** (CDCl<sub>3</sub>, 100 MHz)

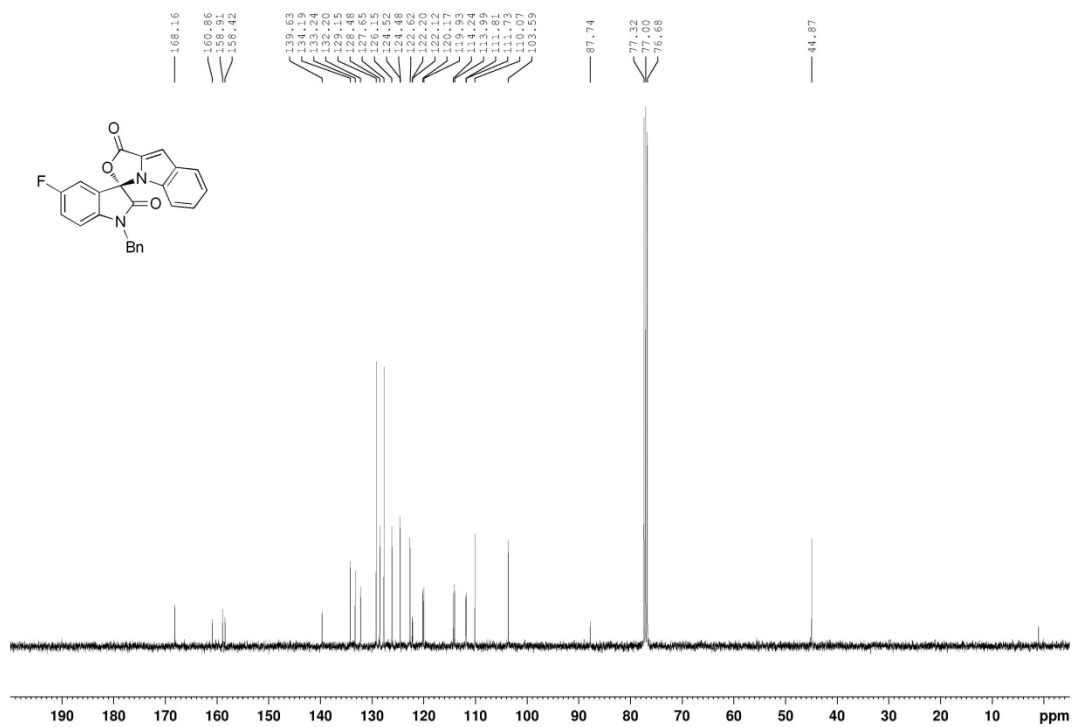

$^{19}\text{F}$  NMR spectrum of compound **5g** ( $\text{CDCl}_3$ , 376 MHz)

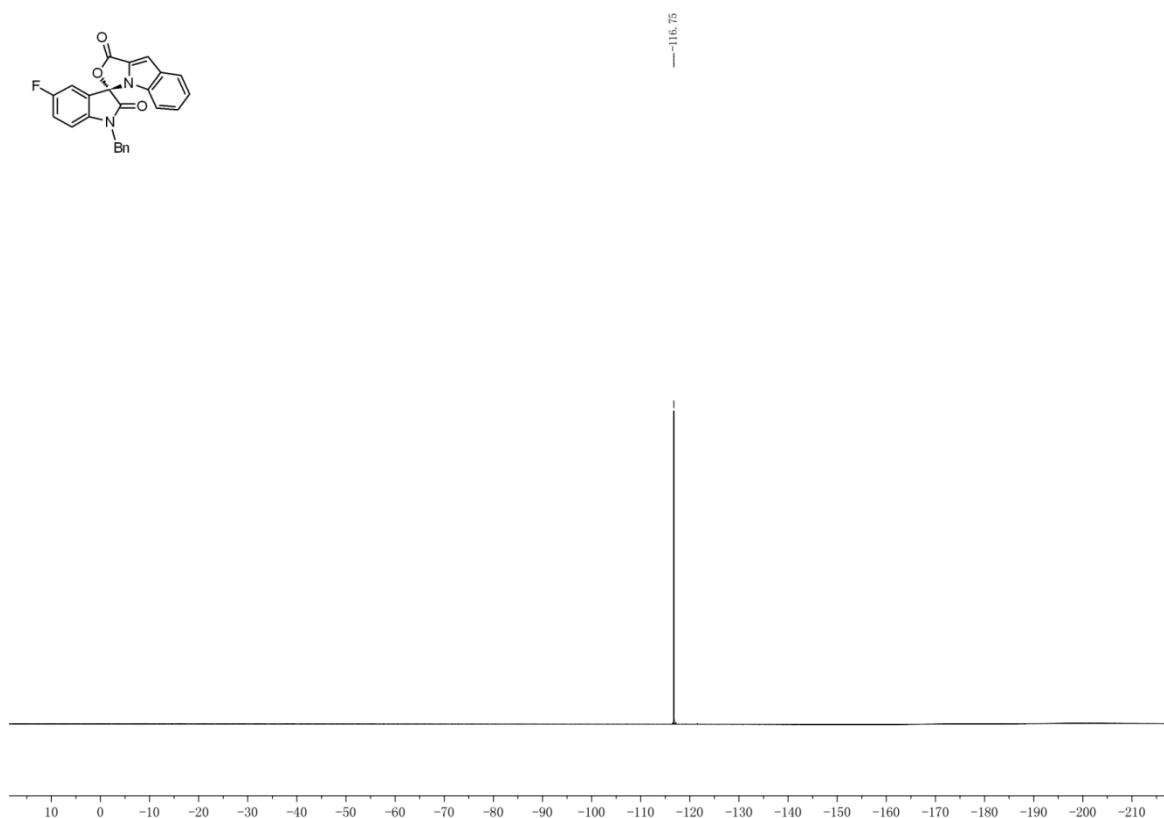

$^1\text{H}$  NMR spectrum of compound **5h** ( $\text{CDCl}_3$ , 400 MHz)

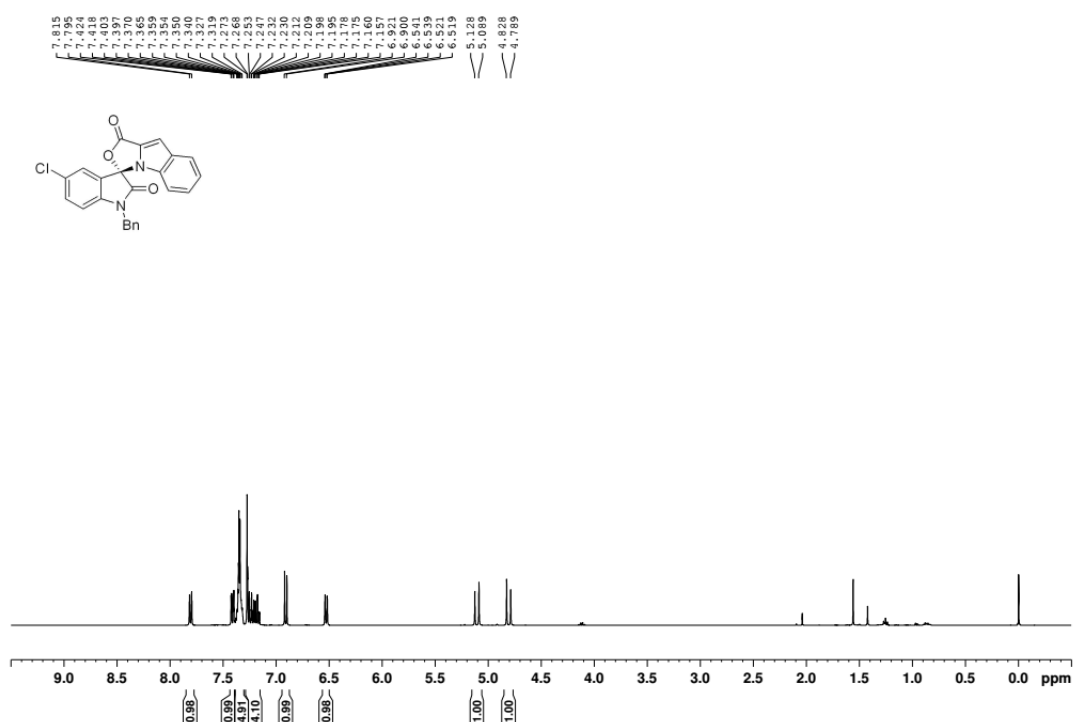

$^{13}\text{C}$  NMR spectrum of compound **5h** ( $\text{CDCl}_3$ , 100 MHz)

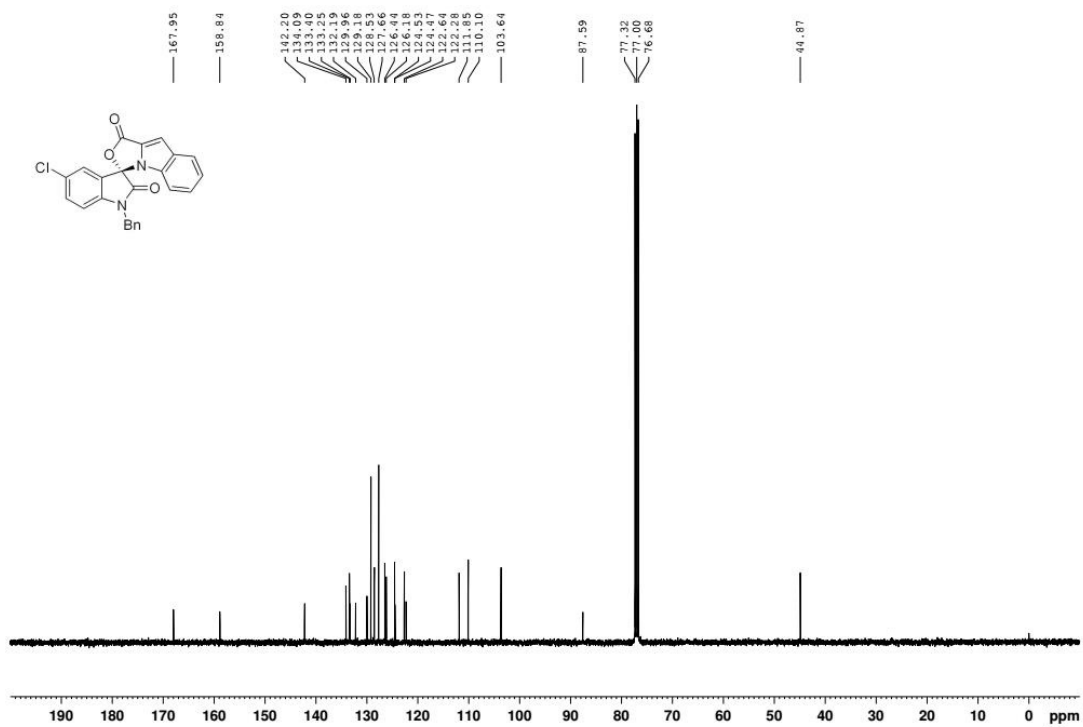

$^1\text{H}$  NMR spectrum of compound **5i** ( $\text{CDCl}_3$ , 400 MHz)

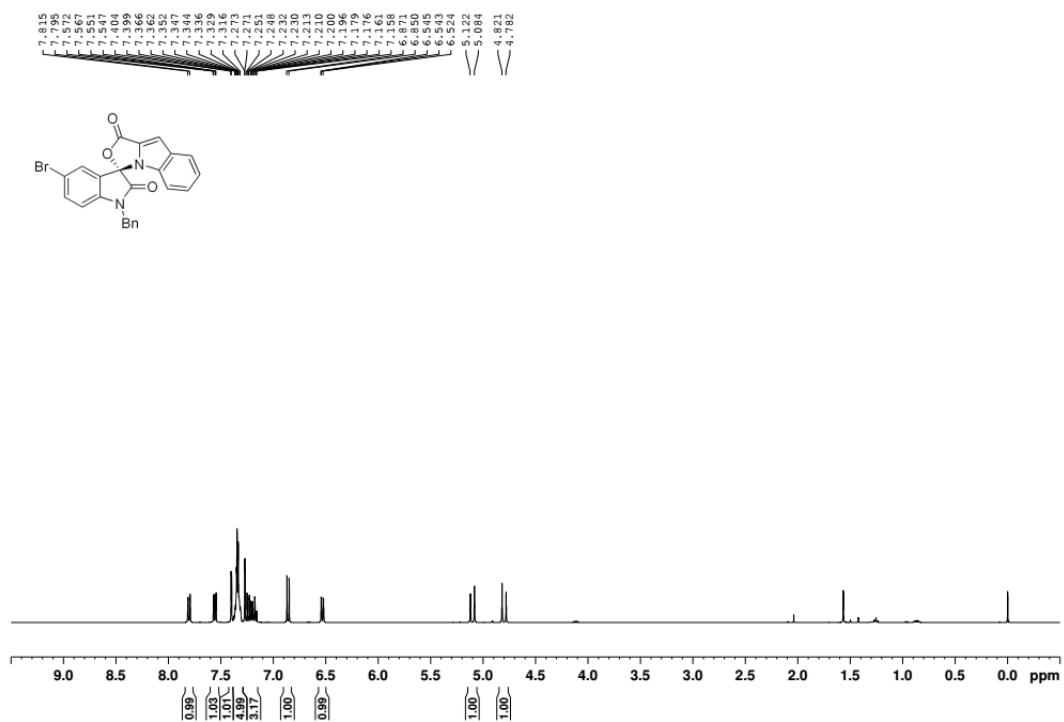

$^{13}\text{C}$  NMR spectrum of compound **5i** ( $\text{CDCl}_3$ , 100 MHz)

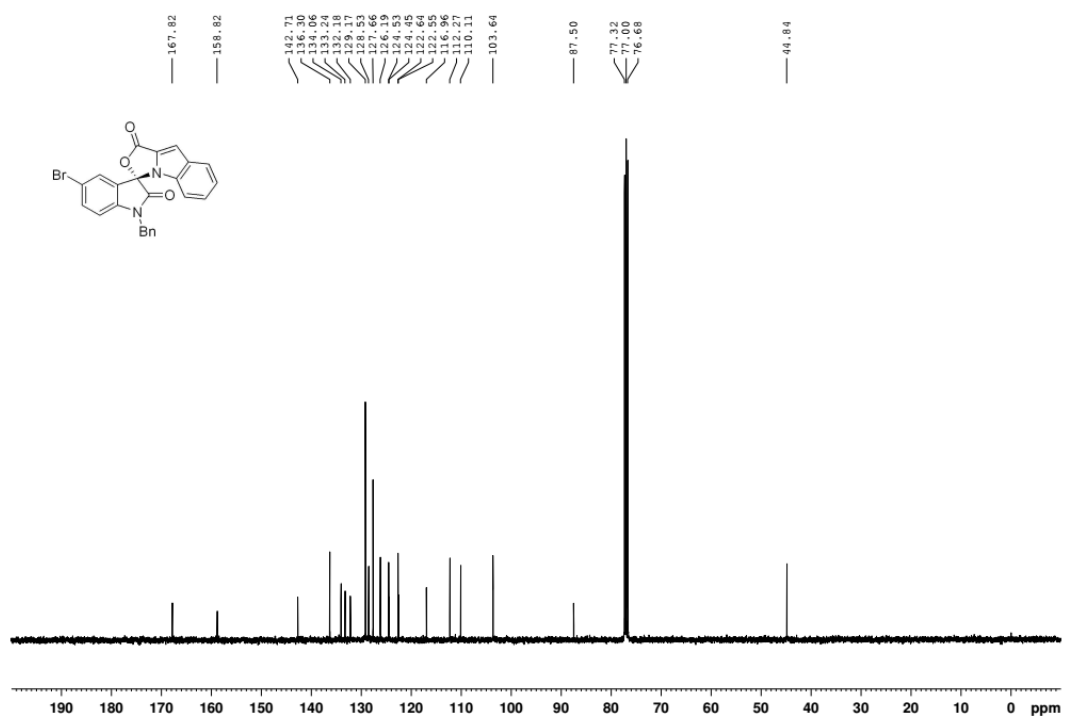

$^1\text{H}$  NMR spectrum of compound **5j** ( $\text{CDCl}_3$ , 400 MHz)

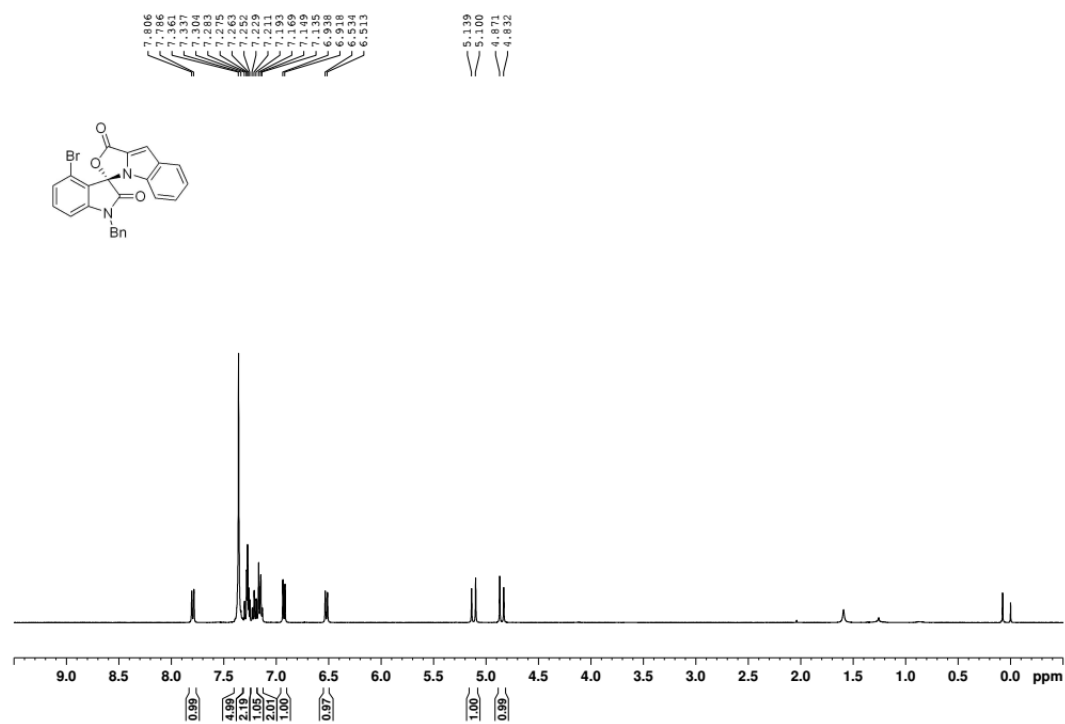



$^{13}\text{C}$  NMR spectrum of compound **5j** ( $\text{CDCl}_3$ , 100 MHz)

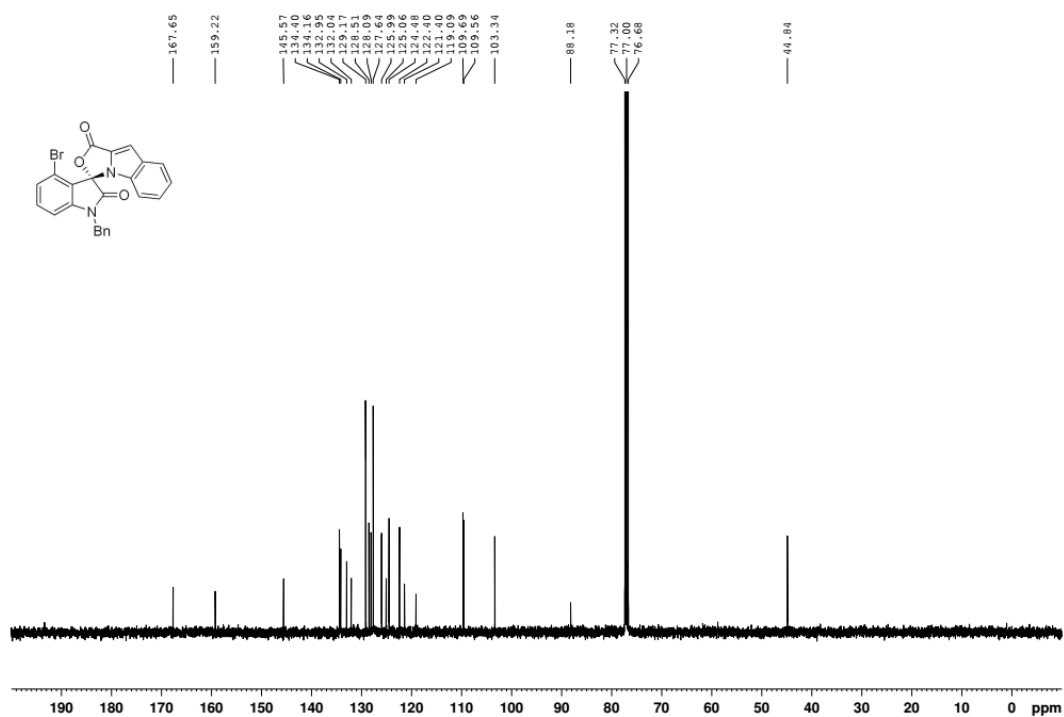

$^1\text{H}$  NMR spectrum of compound **5k** ( $\text{CDCl}_3$ , 400 MHz)

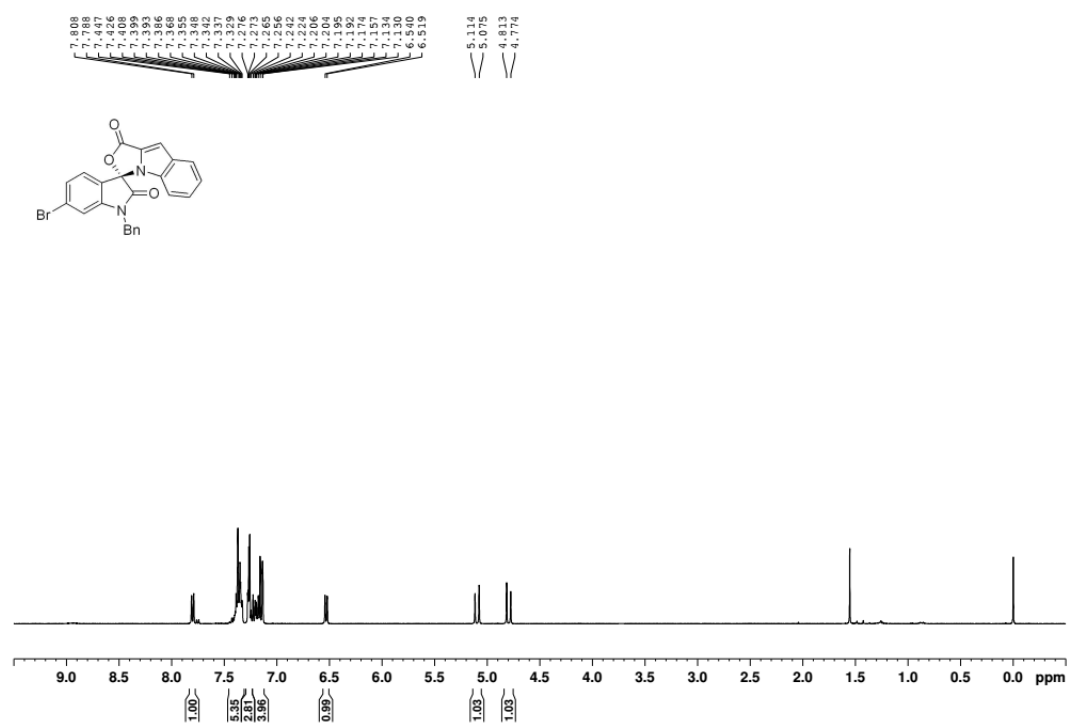

$^{13}\text{C}$  NMR spectrum of compound **5k** ( $\text{CDCl}_3$ , 100 MHz)

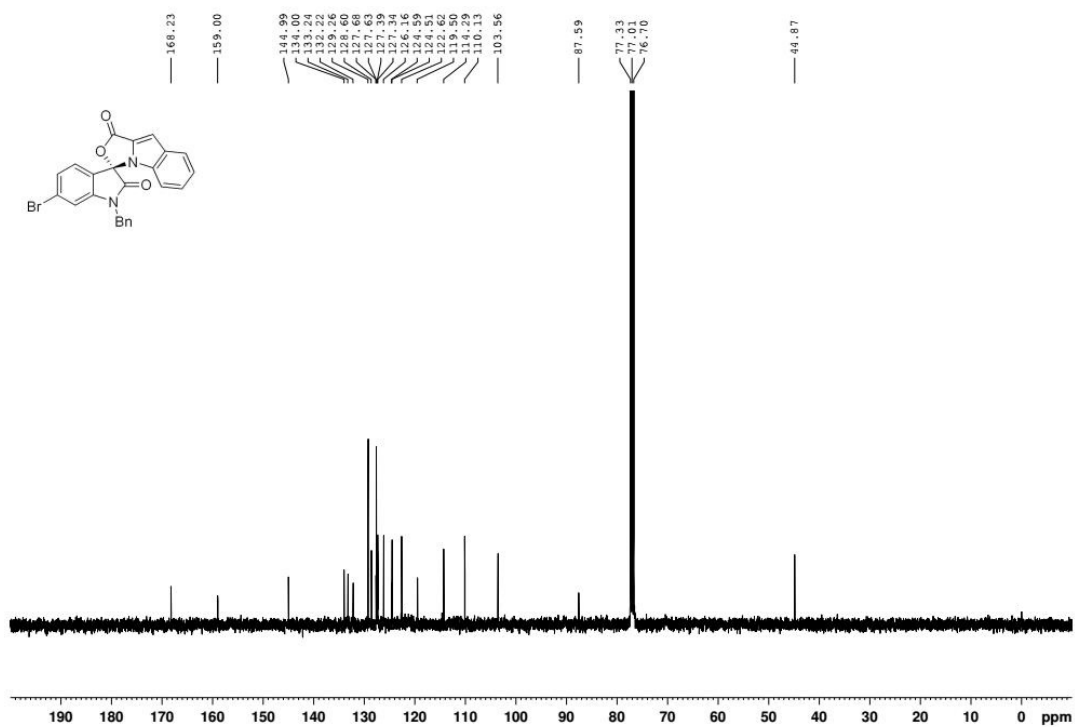

$^1\text{H}$  NMR spectrum of compound **5l** ( $\text{CDCl}_3$ , 400 MHz)

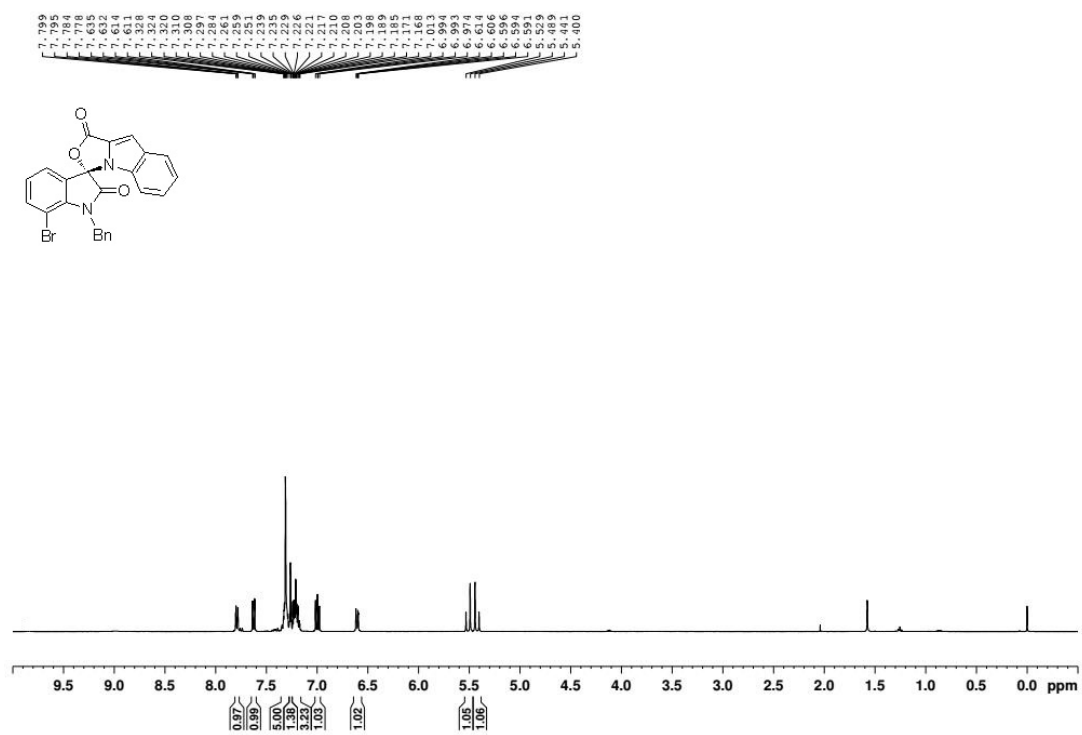

<sup>13</sup>C NMR spectrum of compound **5l** (CDCl<sub>3</sub>, 100 MHz)

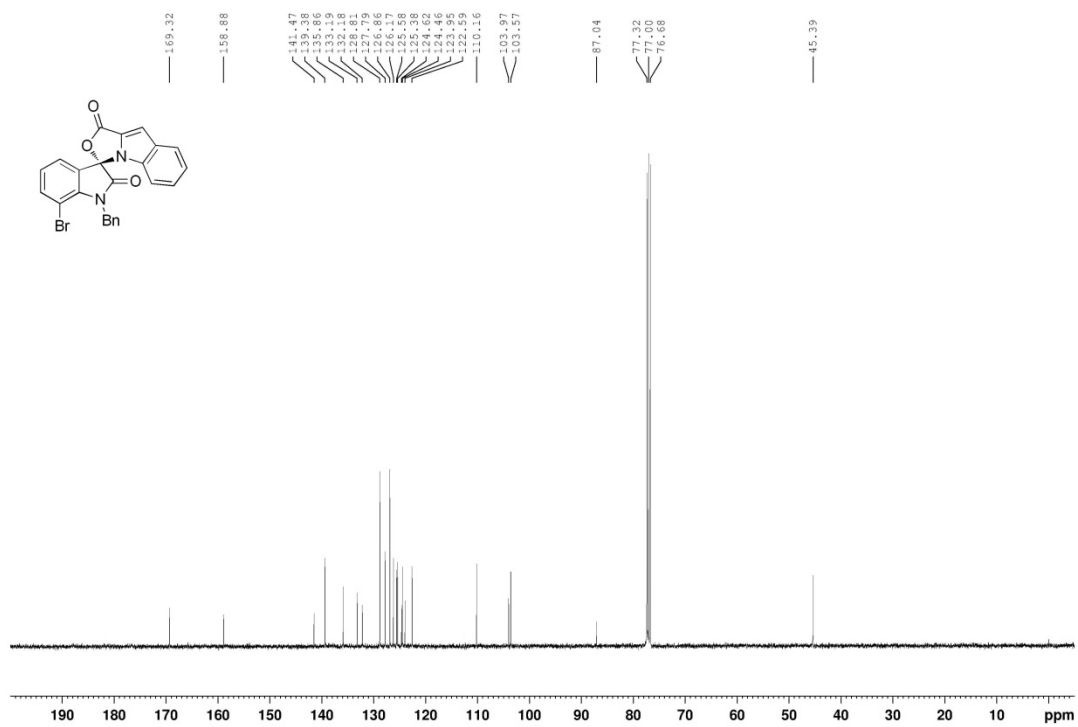

<sup>1</sup>H NMR spectrum of compound **5m** (CDCl<sub>3</sub>, 400 MHz)

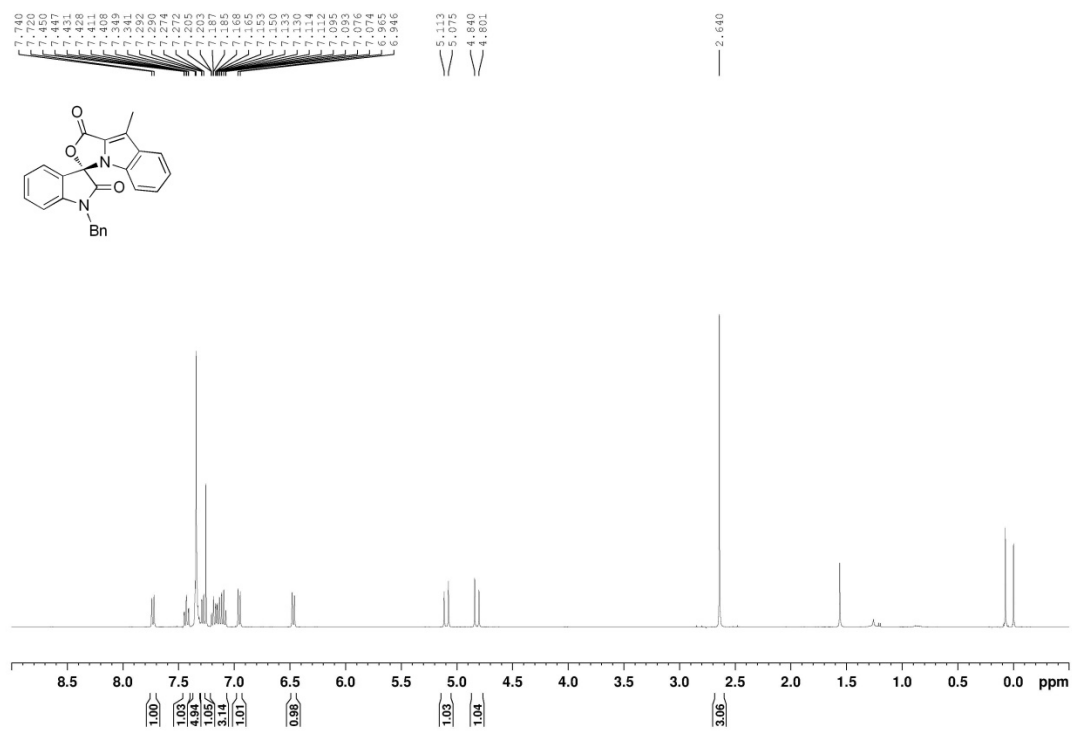

$^{13}\text{C}$  NMR spectrum of compound **5m** ( $\text{CDCl}_3$ , 100 MHz)

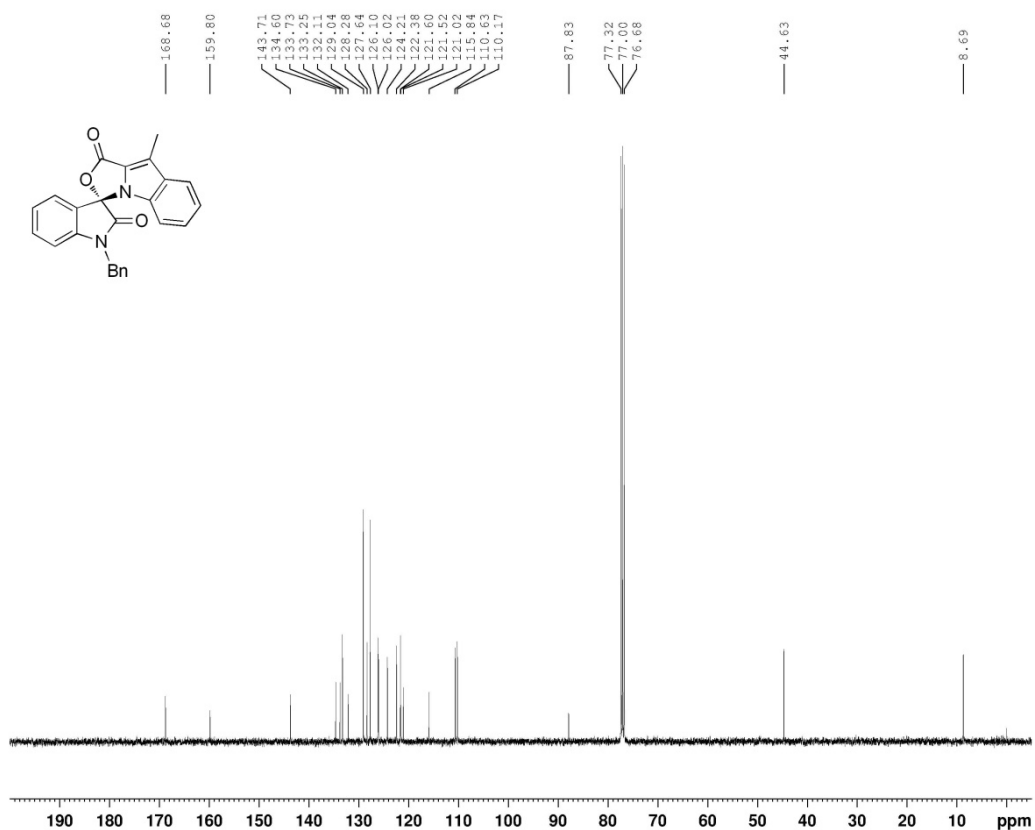

$^1\text{H}$  NMR spectrum of compound **5n** ( $\text{CDCl}_3$ , 400 MHz)

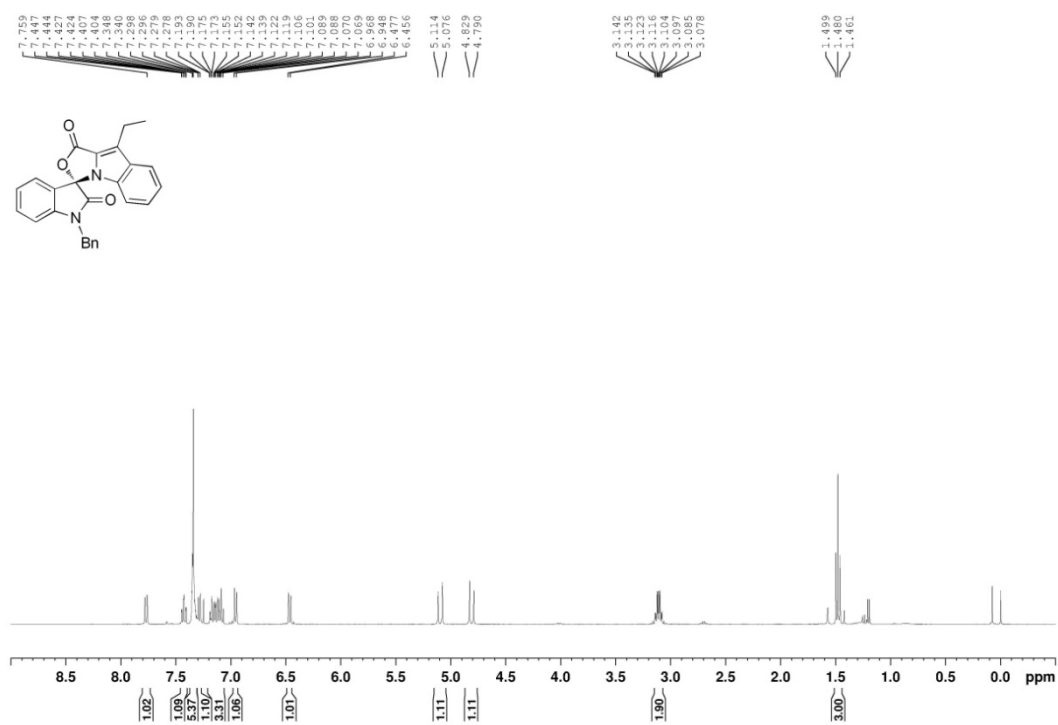

<sup>13</sup>C NMR spectrum of compound **5n** (CDCl<sub>3</sub>, 100 MHz)

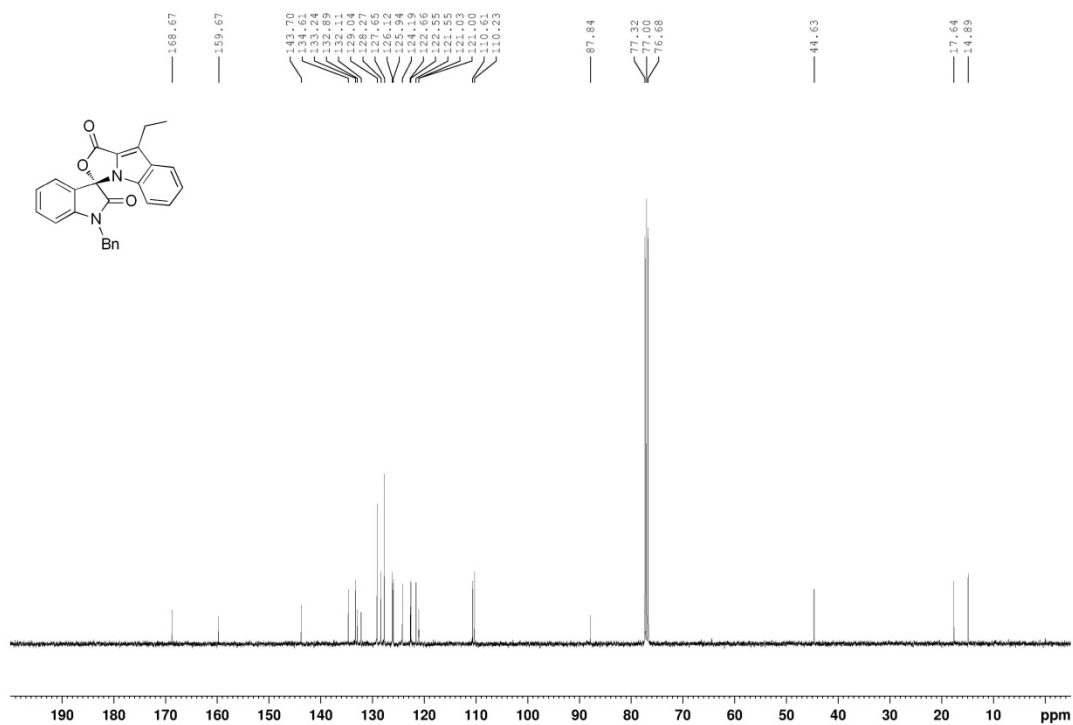

<sup>1</sup>H NMR spectrum of compound **5o** (CDCl<sub>3</sub>, 400 MHz)

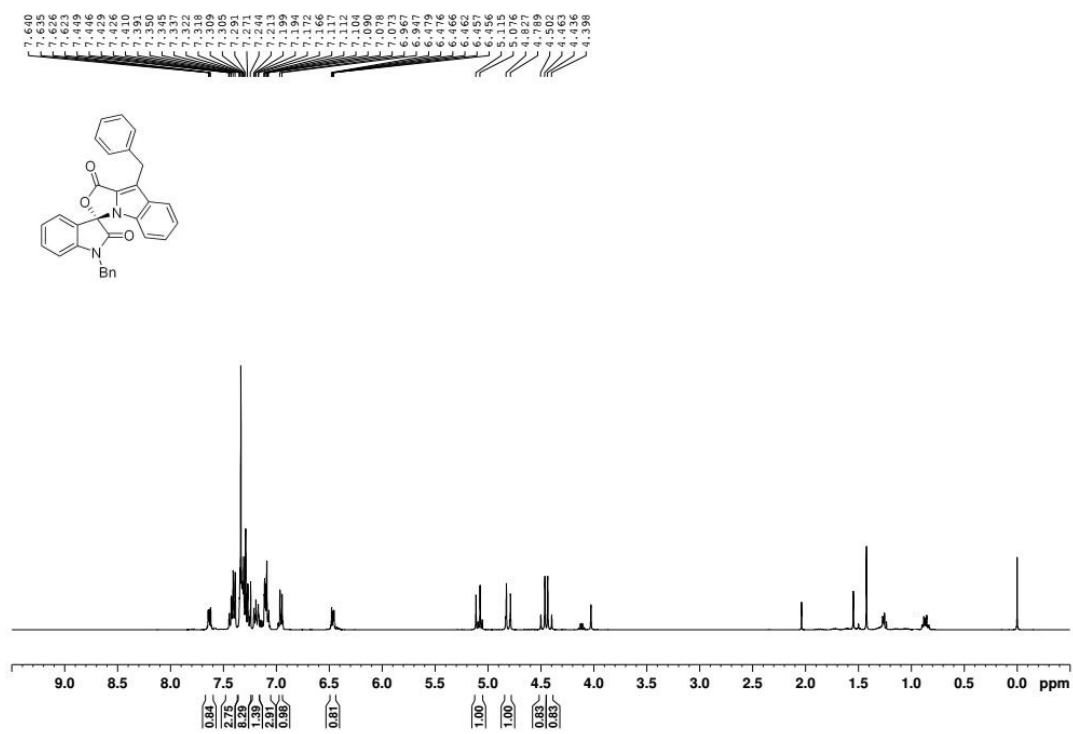

$^{13}\text{C}$  NMR spectrum of compound **5o** ( $\text{CDCl}_3$ , 100 MHz)

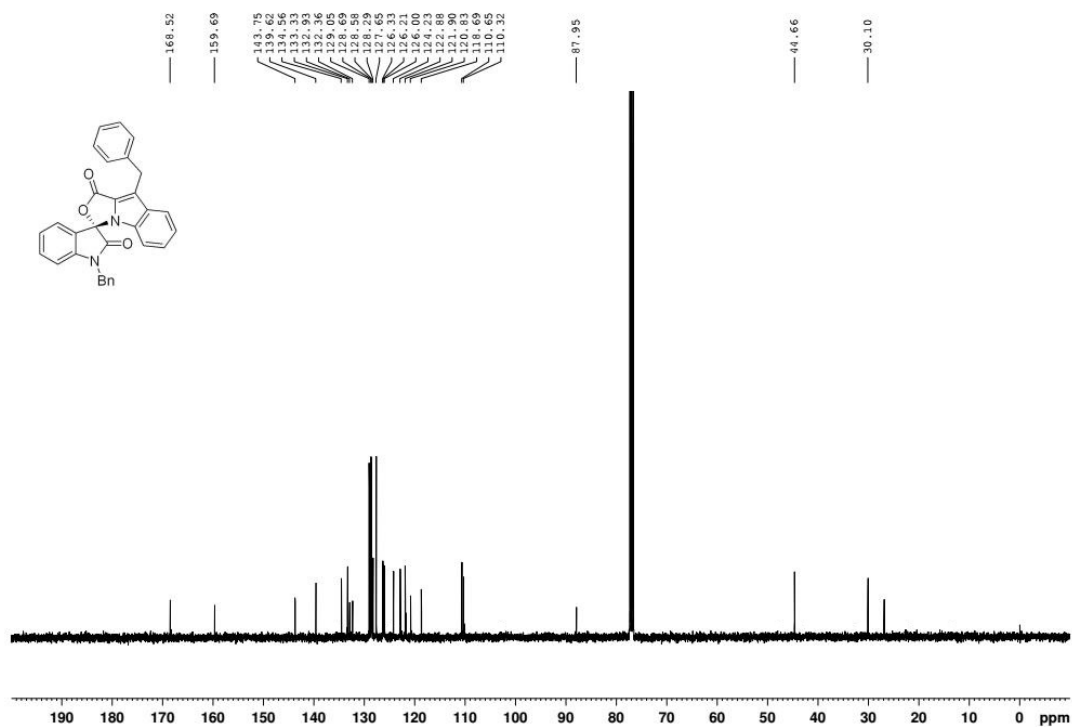

$^1\text{H}$  NMR spectrum of compound **5p** ( $\text{CDCl}_3$ , 400 MHz)

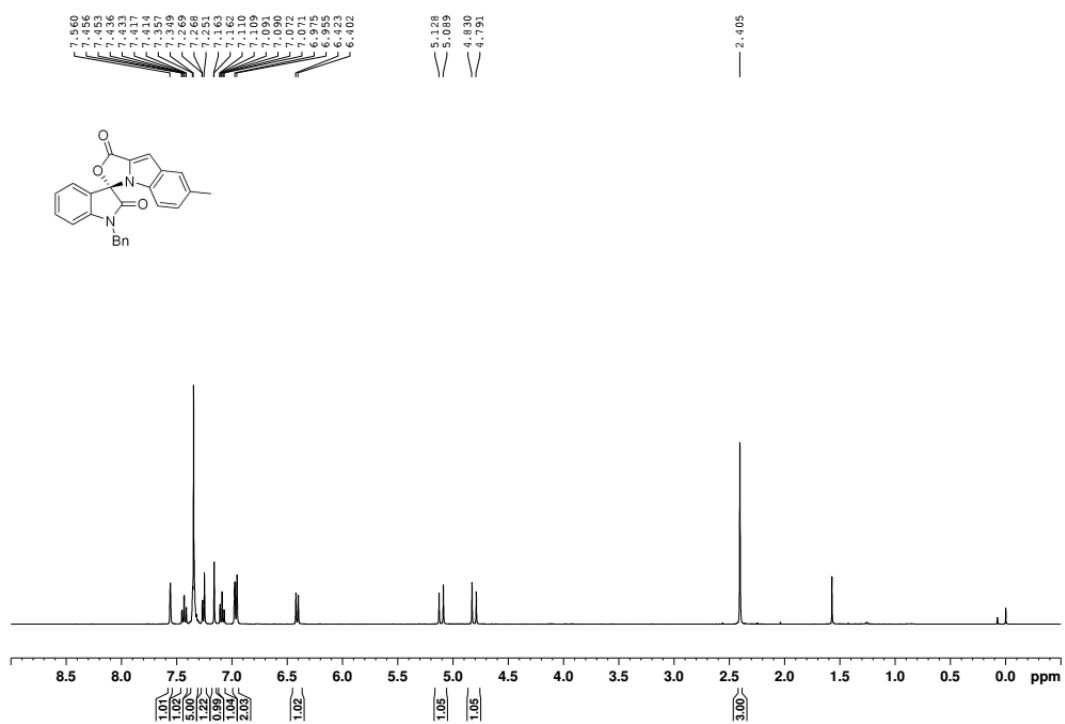

$^{13}\text{C}$  NMR spectrum of compound **5p** ( $\text{CDCl}_3$ , 100 MHz)

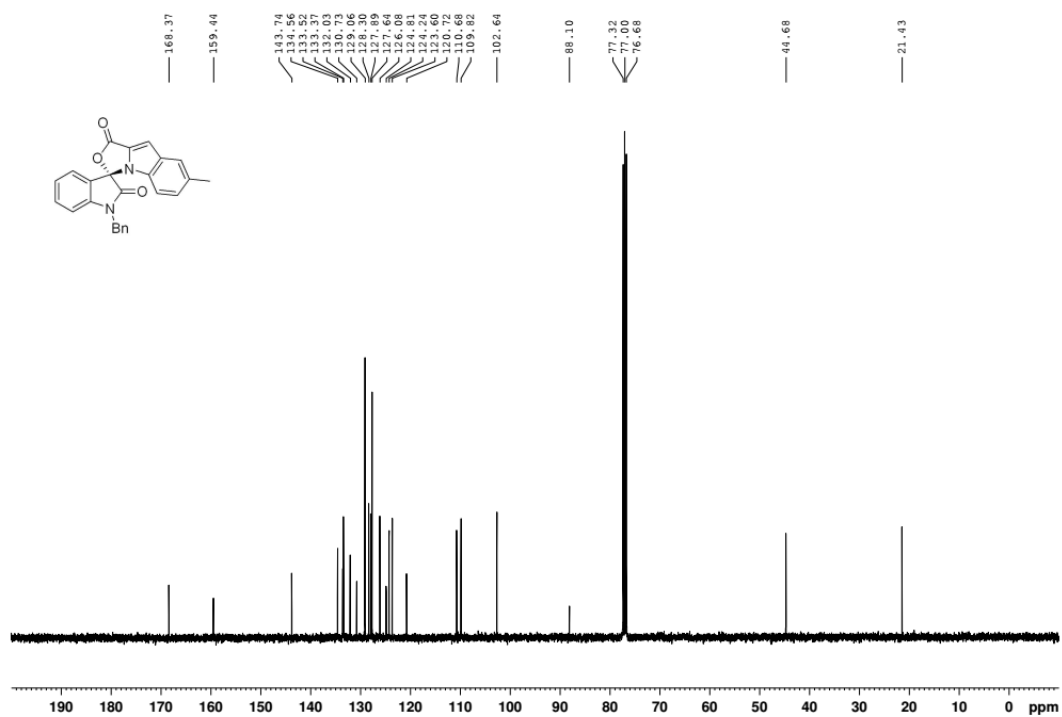

$^1\text{H}$  NMR spectrum of compound **5q** ( $\text{CDCl}_3$ , 400 MHz)

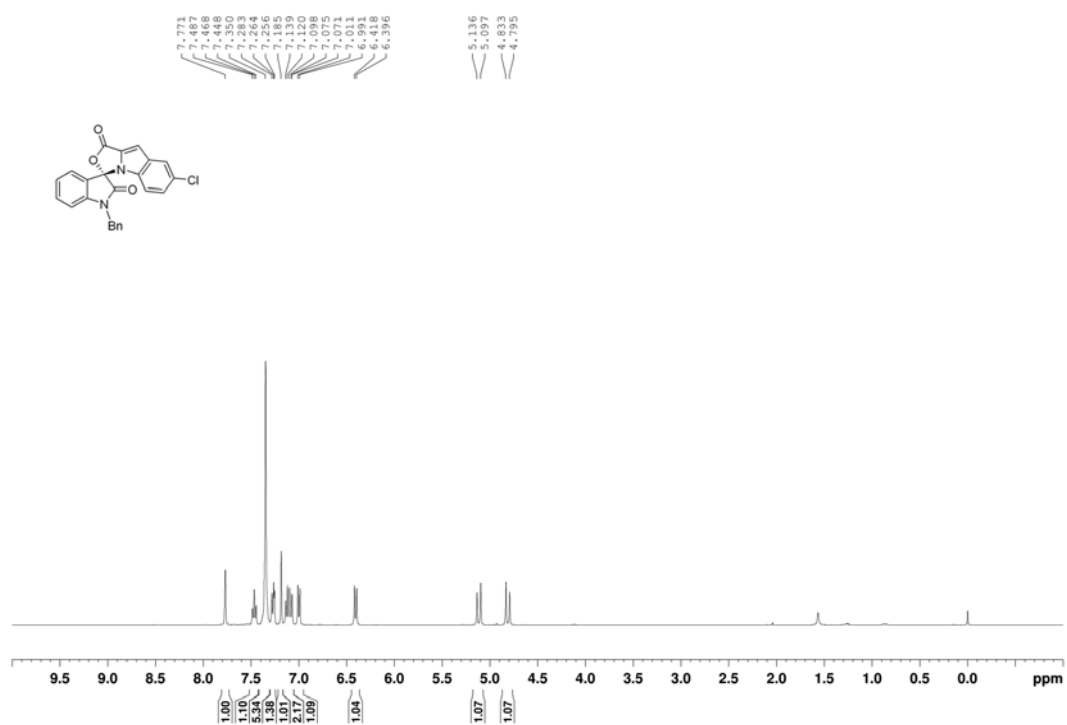

$^{13}\text{C}$  NMR spectrum of compound **5q** ( $\text{CDCl}_3$ , 100 MHz)

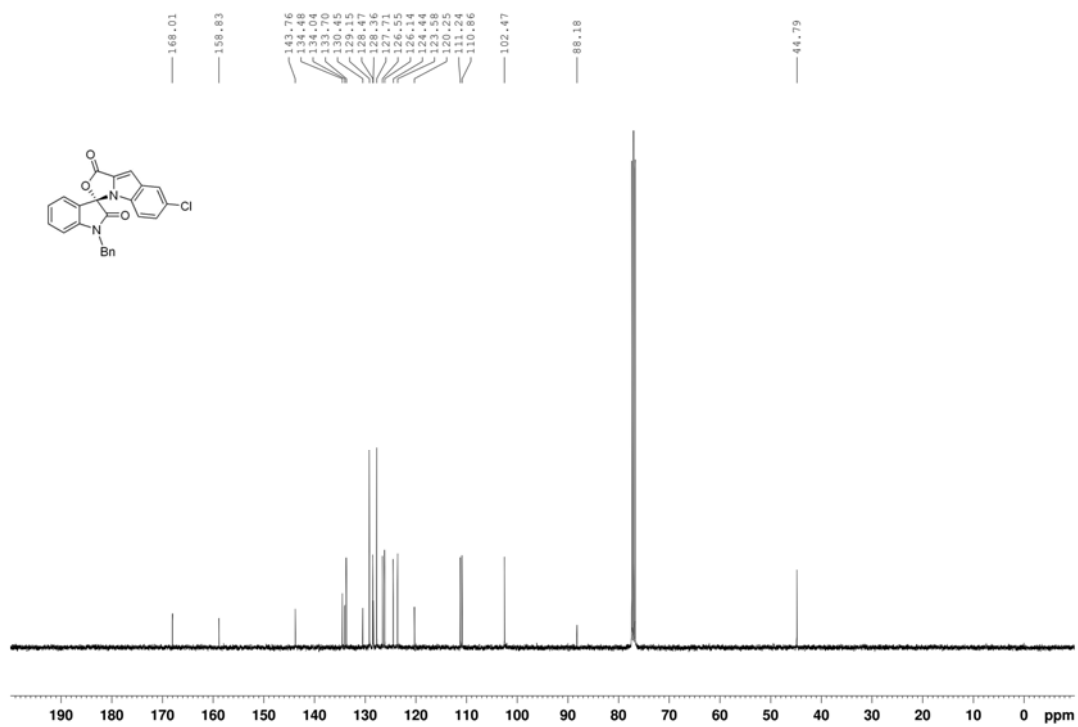

$^1\text{H}$  NMR spectrum of compound **5r** ( $\text{CDCl}_3$ , 400 MHz)

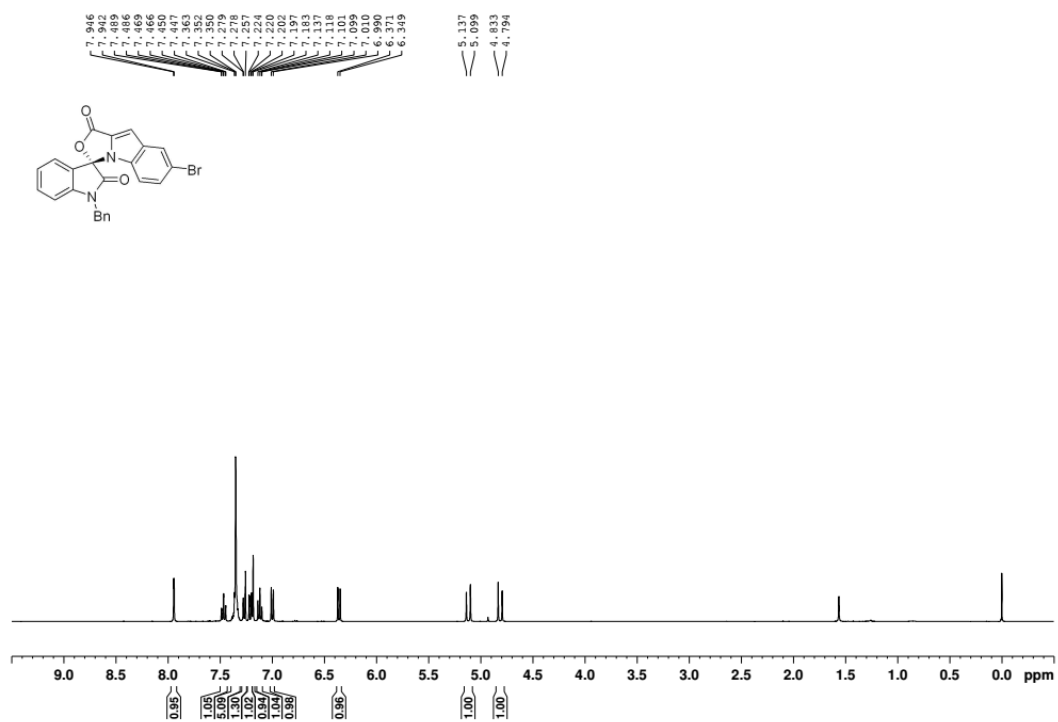



$^{13}\text{C}$  NMR spectrum of compound **5r** ( $\text{CDCl}_3$ , 100 MHz)

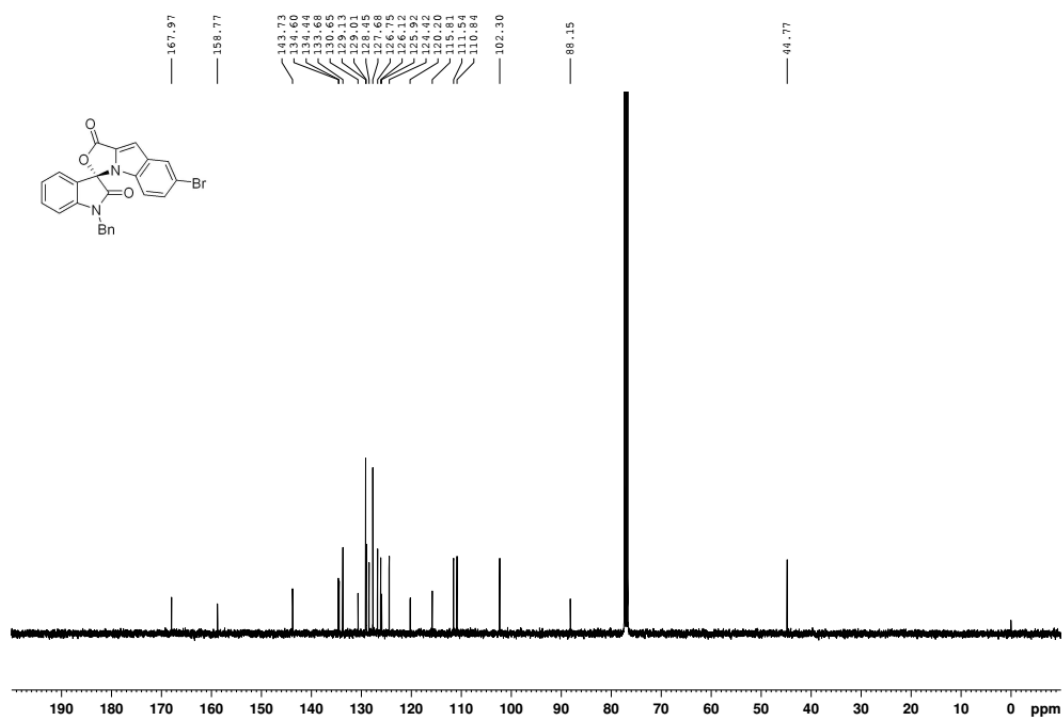

$^1\text{H}$  NMR spectrum of compound **5s** ( $\text{CDCl}_3$ , 400 MHz)

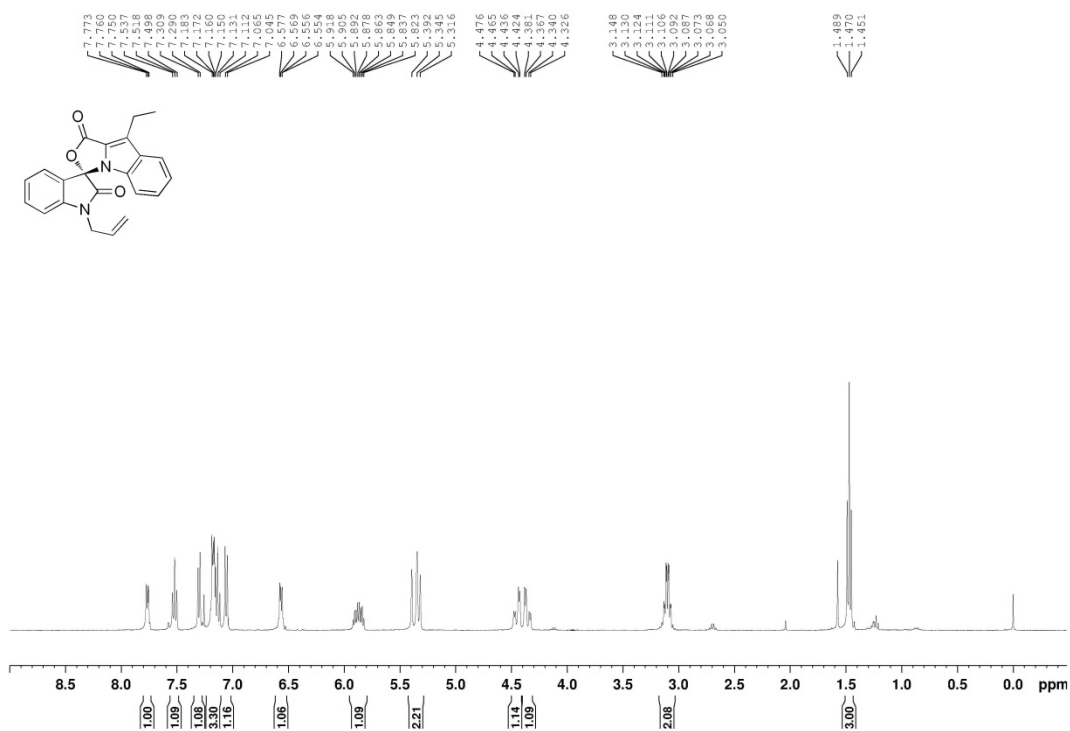

$^{13}\text{C}$  NMR spectrum of compound **5s** ( $\text{CDCl}_3$ , 100 MHz)

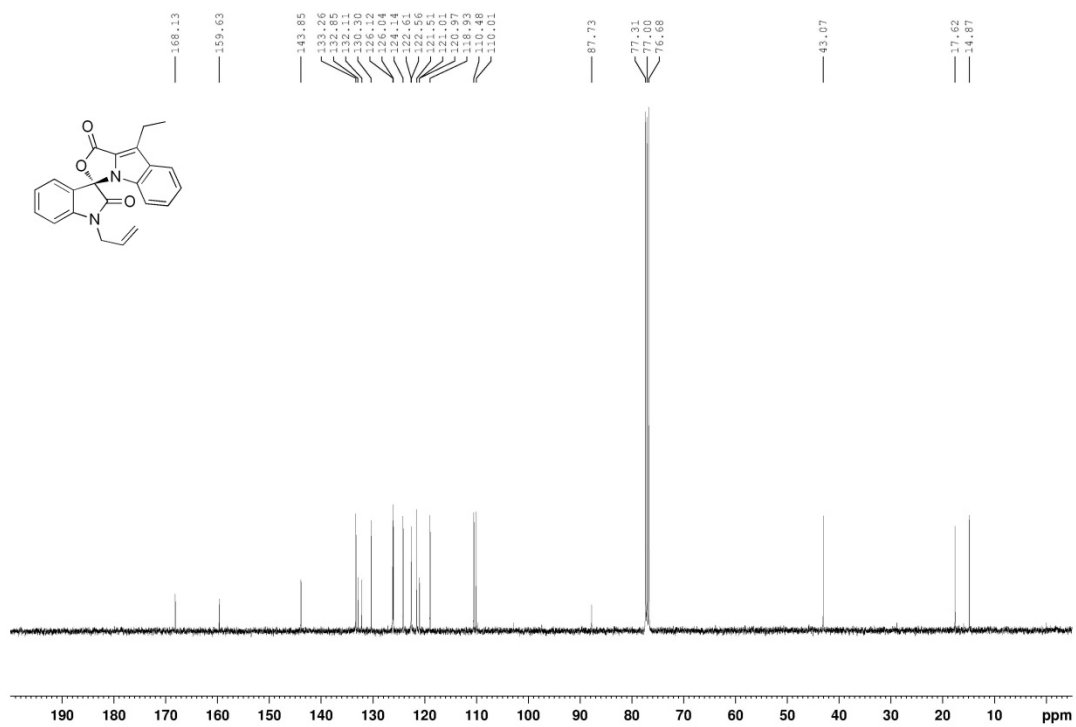

$^1\text{H}$  NMR spectrum of compound **7** ( $\text{CDCl}_3$ , 400 MHz)

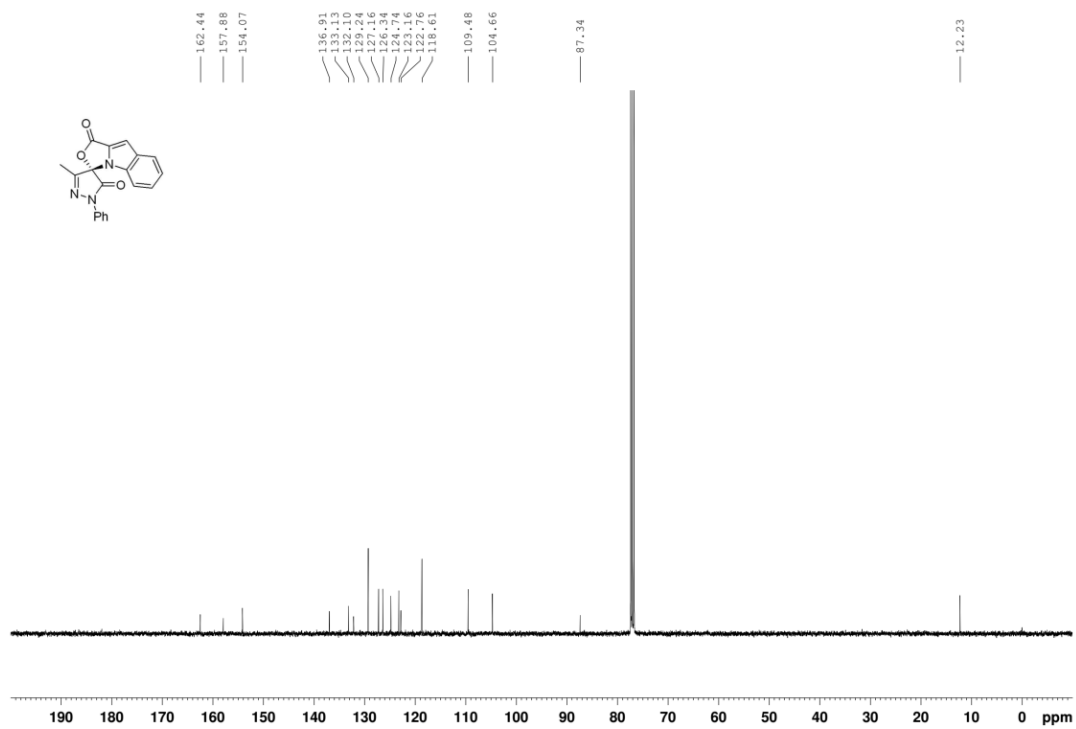

$^{13}\text{C}$  NMR spectrum of compound **7** ( $\text{CDCl}_3$ , 100 MHz)

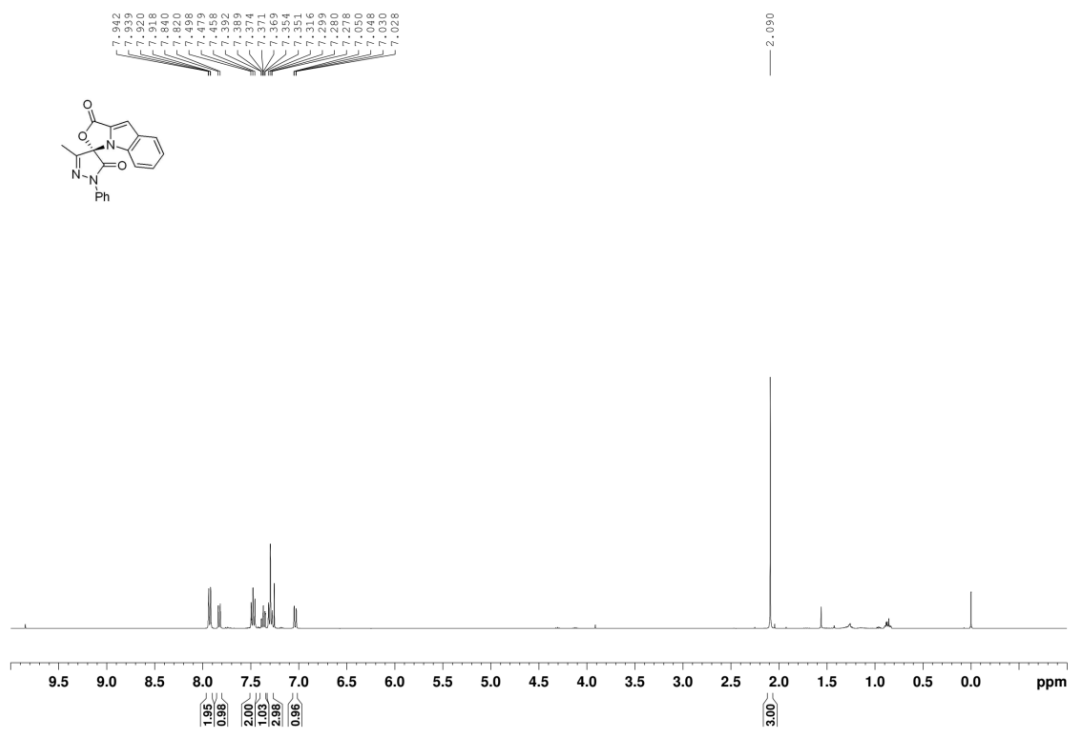

## 7. HPLC spectra of the compounds 5a–5s and 7

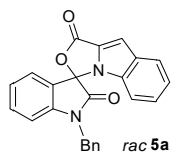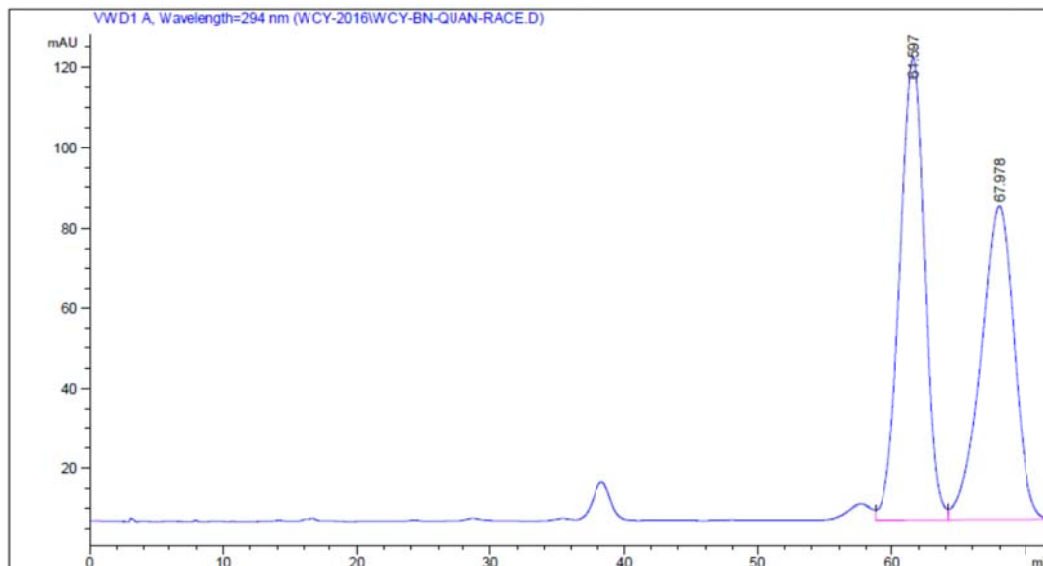

| Peak | Processed channel | Ret. Time (min) | Area (mAu*s) | Height (mAu) | Area (%) |
|------|-------------------|-----------------|--------------|--------------|----------|
| 1    | PDA 294.0 nm      | 61.597          | 1.49424e4    | 115.11676    | 52.4798  |
| 2    | PDA 294.0 nm      | 67.978          | 1.35303e4    | 78.13834     | 47.5202  |

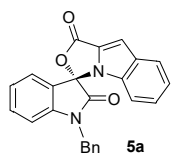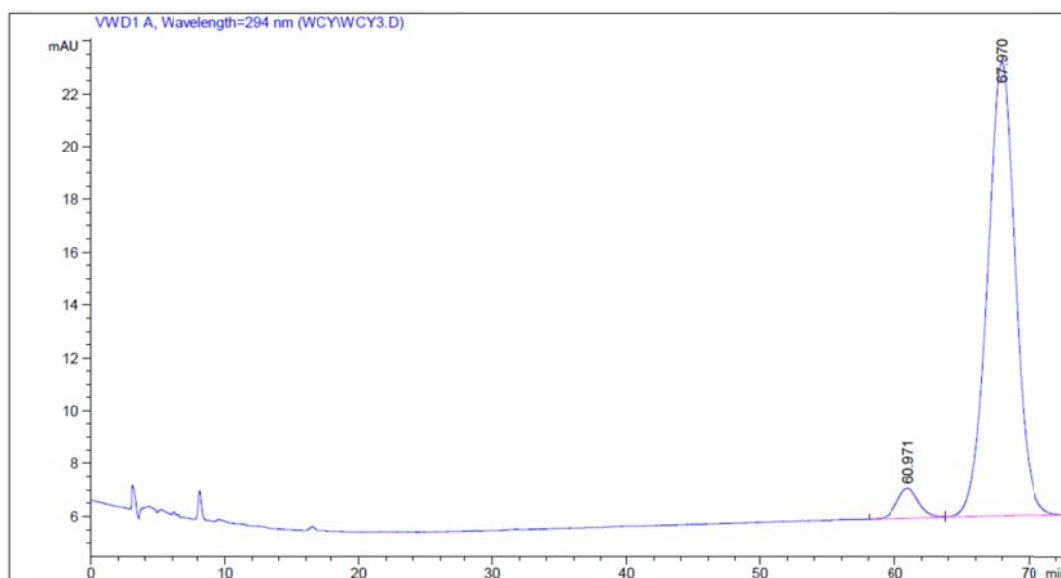

| Peak | Processed channel | Ret. Time (min) | Area (mAu*s) | Height (mAu) | Area (%) |
|------|-------------------|-----------------|--------------|--------------|----------|
| 1    | PDA 294.0 nm      | 60.971          | 130.18935    | 1.13687      | 4.9741   |
| 2    | PDA 294.0 nm      | 67.970          | 2487.13257   | 17.19423     | 95.0259  |

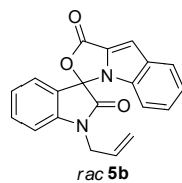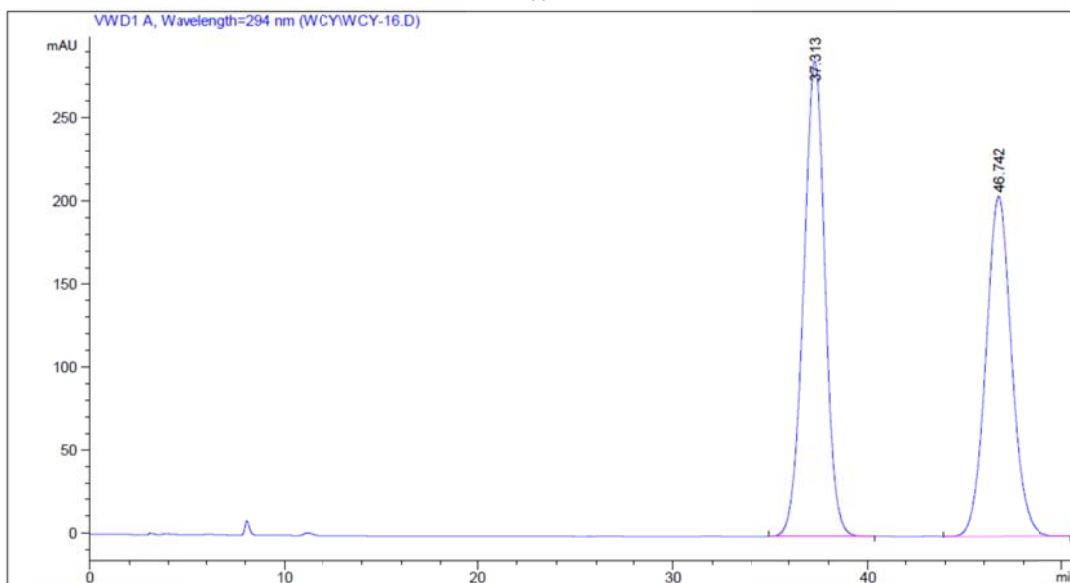

| Peak | Processed channel | Ret. Time (min) | Area (mAu*s) | Height (mAu) | Area (%) |
|------|-------------------|-----------------|--------------|--------------|----------|
| 1    | PDA 294.0 nm      | 37.313          | 2.15194e4    | 285.90811    | 53.6338  |
| 2    | PDA 294.0 nm      | 46.742          | 1.86035e4    | 204.31013    | 46.3662  |

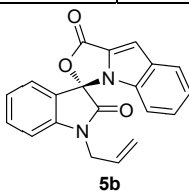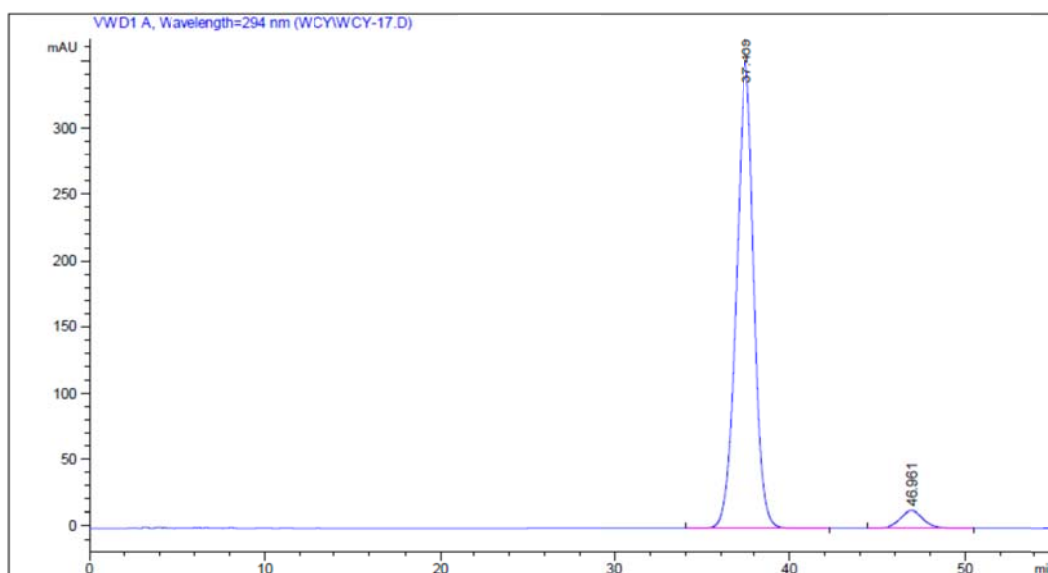

| Peak | Processed channel | Ret. Time (min) | Area (mAu*s) | Height (mAu) | Area (%) |
|------|-------------------|-----------------|--------------|--------------|----------|
| 1    | PDA 294.0 nm      | 37.469          | 2.66289e4    | 350.35040    | 95.7544  |
| 2    | PDA 294.0 nm      | 46.961          | 1180.67224   | 12.99745     | 4.2456   |

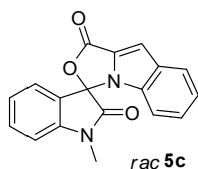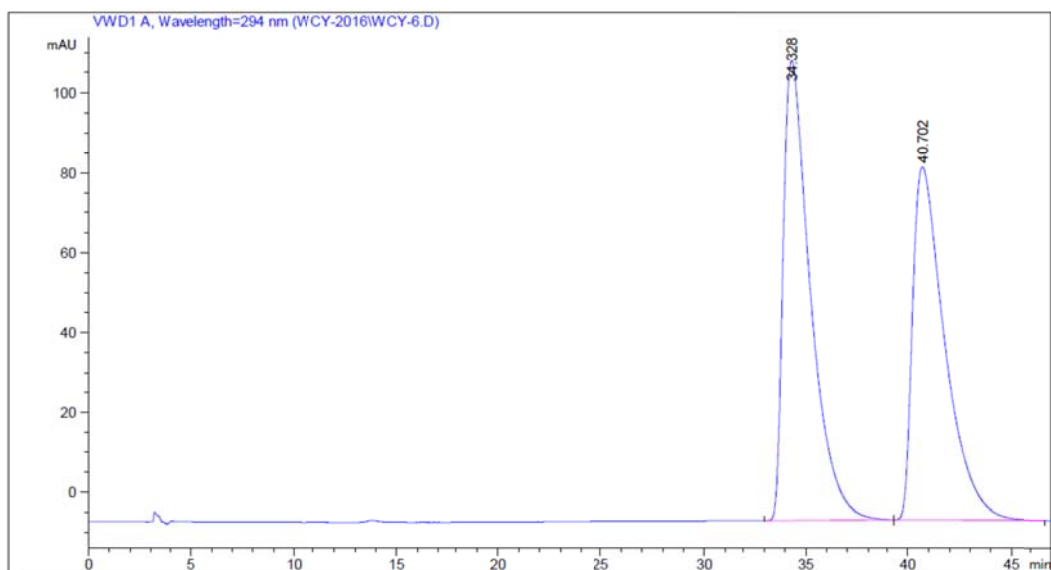

| Peak | Processed channel | Ret. Time (min) | Area (mAu*s) | Height (mAu) | Area (%) |
|------|-------------------|-----------------|--------------|--------------|----------|
| 1    | PDA 294.0 nm      | 34.328          | 1.04430e4    | 114.99951    | 52.1907  |
| 2    | PDA 294.0 nm      | 40.702          | 9566.28320   | 88.38822     | 47.8093  |

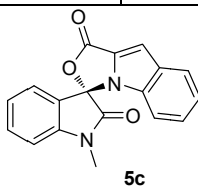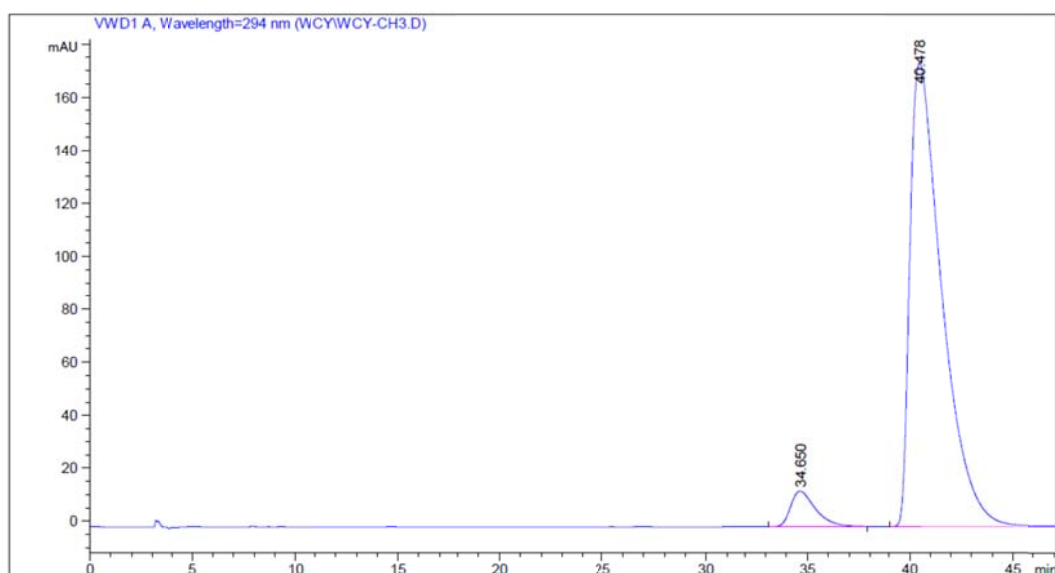

| Peak | Processed channel | Ret. Time (min) | Area (mAu*s) | Height (mAu) | Area (%) |
|------|-------------------|-----------------|--------------|--------------|----------|
| 1    | PDA 294.0 nm      | 34.650          | 1099.81250   | 13.33855     | 5.5591   |
| 2    | PDA 294.0 nm      | 40.478          | 1.86840e4    | 174.77658    | 94.4409  |

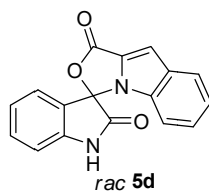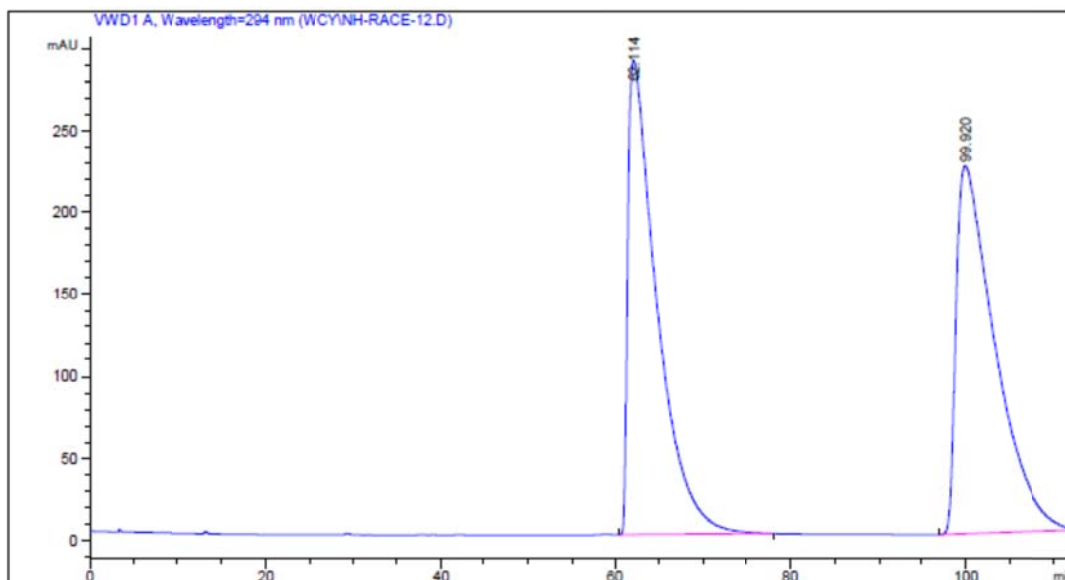

| Peak | Processed channel | Ret. Time (min) | Area (mAu*s) | Height (mAu) | Area (%) |
|------|-------------------|-----------------|--------------|--------------|----------|
| 1    | PDA 294.0 nm      | 62.114          | 6.54116e4    | 288.70721    | 48.9070  |
| 2    | PDA 294.0 nm      | 99.920          | 6.83354e4    | 223.84796    | 51.0930  |

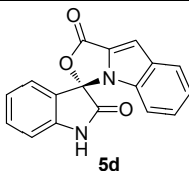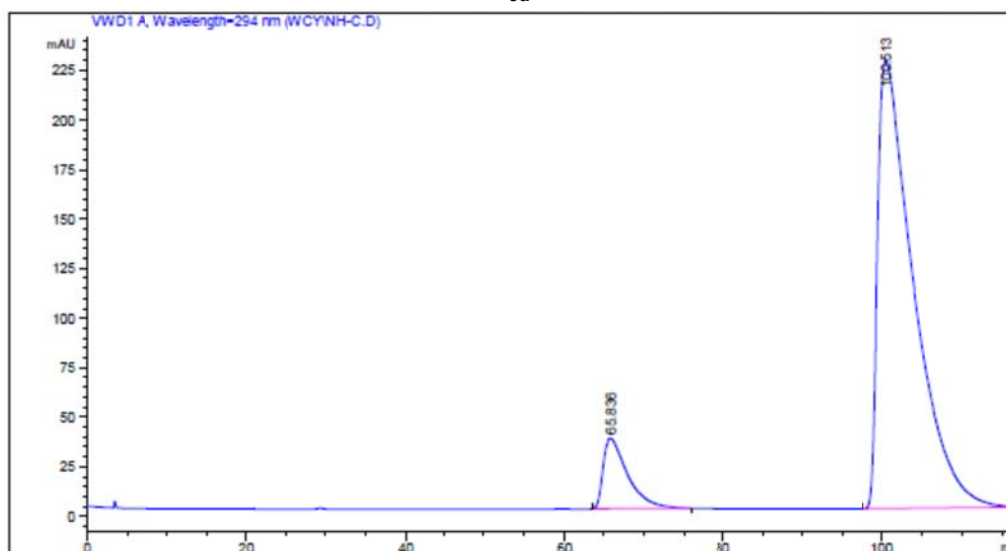

| Peak | Processed channel | Ret. Time (min) | Area (mAu*s) | Height (mAu) | Area (%) |
|------|-------------------|-----------------|--------------|--------------|----------|
| 1    | PDA 294.0 nm      | 65.836          | 7414.70264   | 35.33968     | 9.5695   |
| 2    | PDA 294.0 nm      | 100.513         | 7.00679e4    | 226.05521    | 90.4305  |

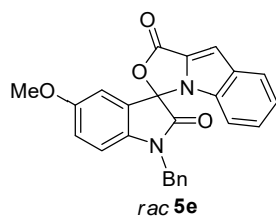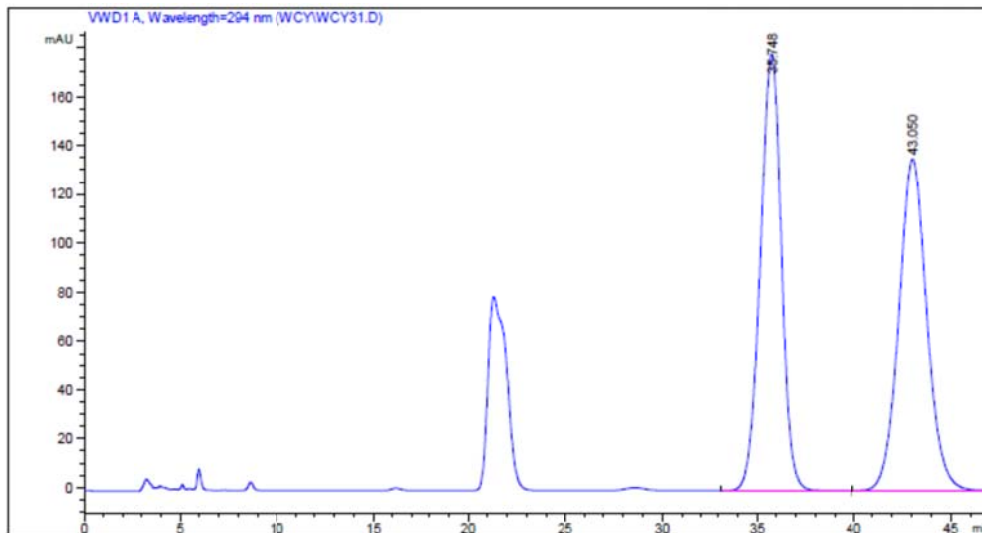

| Peak | Processed channel | Ret. Time (min) | Area (mAu*s) | Height (mAu) | Area (%) |
|------|-------------------|-----------------|--------------|--------------|----------|
| 1    | PDA 294.0 nm      | 35.748          | 1.33497e4    | 178.45653    | 49.6395  |
| 2    | PDA 294.0 nm      | 43.050          | 1.35436e4    | 135.54822    | 50.3605  |

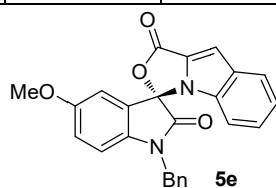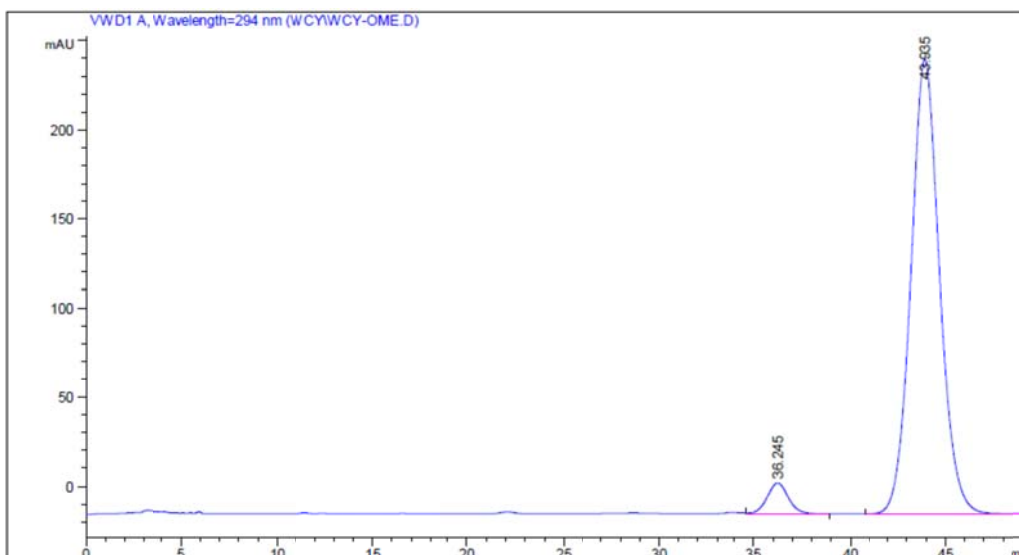

| Peak | Processed channel | Ret. Time (min) | Area (mAu*s) | Height (mAu) | Area (%) |
|------|-------------------|-----------------|--------------|--------------|----------|
| 1    | PDA 294.0 nm      | 36.245          | 1303.65552   | 17.24951     | 4.7390   |
| 2    | PDA 294.0 nm      | 43.935          | 2.62057e4    | 254.83798    | 95.2610  |



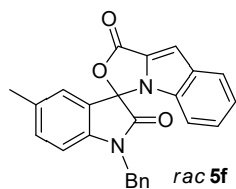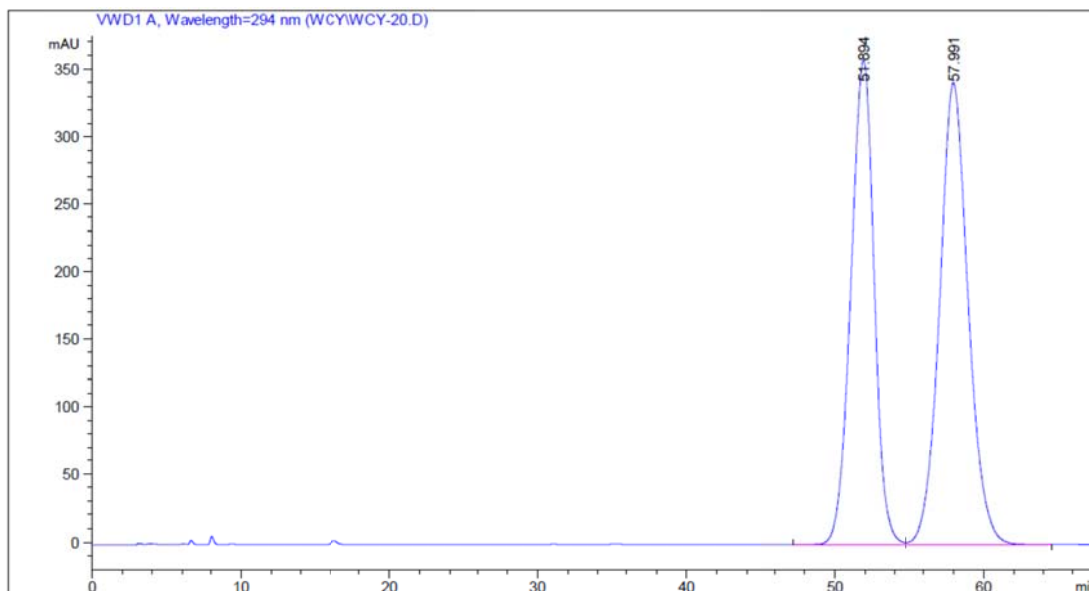

| Peak | Processed channel | Ret. Time (min) | Area (mAu*s) | Height (mAu) | Area (%) |
|------|-------------------|-----------------|--------------|--------------|----------|
| 1    | PDA 294.0 nm      | 51.894          | 3.82382e4    | 357.92993    | 45.8574  |
| 2    | PDA 294.0 nm      | 57.991          | 4.51468e4    | 341.38016    | 54.1426  |

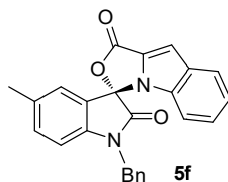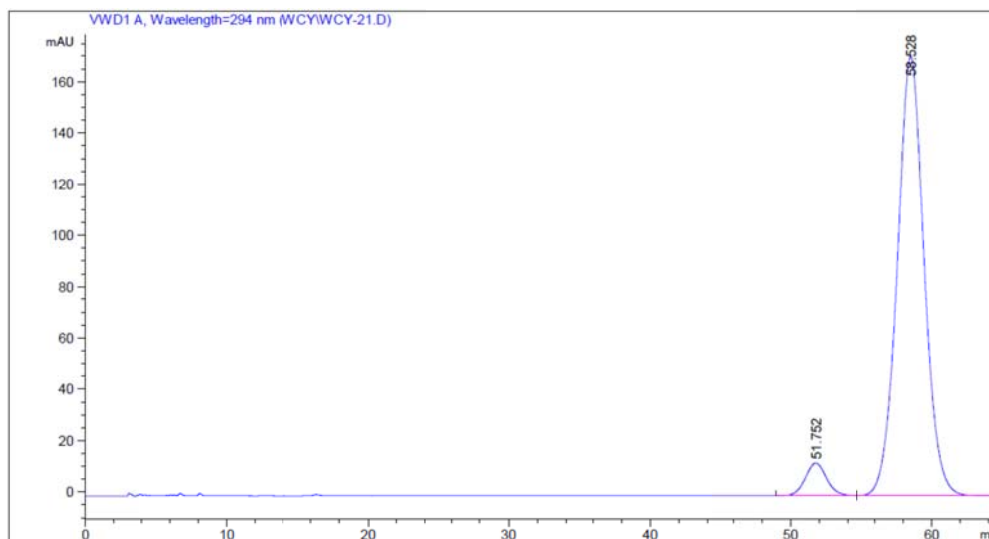

| Peak | Processed channel | Ret. Time (min) | Area (mAu*s) | Height (mAu) | Area (%) |
|------|-------------------|-----------------|--------------|--------------|----------|
| 1    | PDA 294.0 nm      | 51.752          | 1294.78870   | 12.63601     | 5.4683   |
| 2    | PDA 294.0 nm      | 58.528          | 2.23832e4    | 171.22549    | 94.5317  |

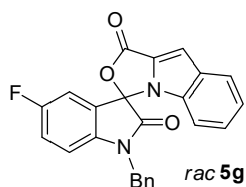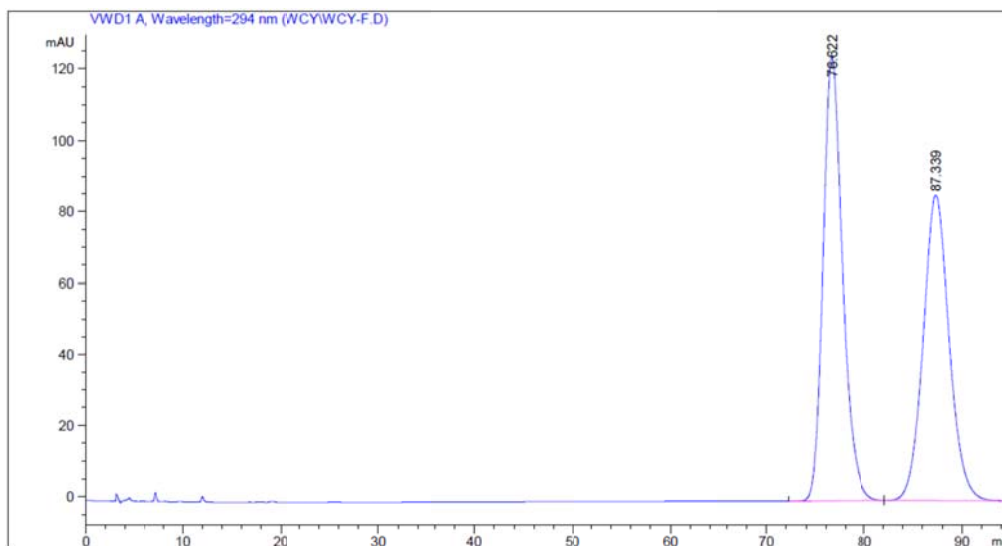

| Peak | Processed channel | Ret. Time (min) | Area (mAu*s) | Height (mAu) | Area (%) |
|------|-------------------|-----------------|--------------|--------------|----------|
| 1    | PDA 294.0 nm      | 76.622          | 1.71976e4    | 124.42851    | 52.1967  |
| 2    | PDA 294.0 nm      | 87.339          | 1.57501e4    | 85.62537     | 47.8033  |

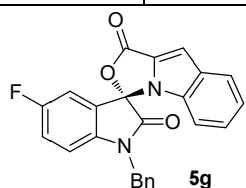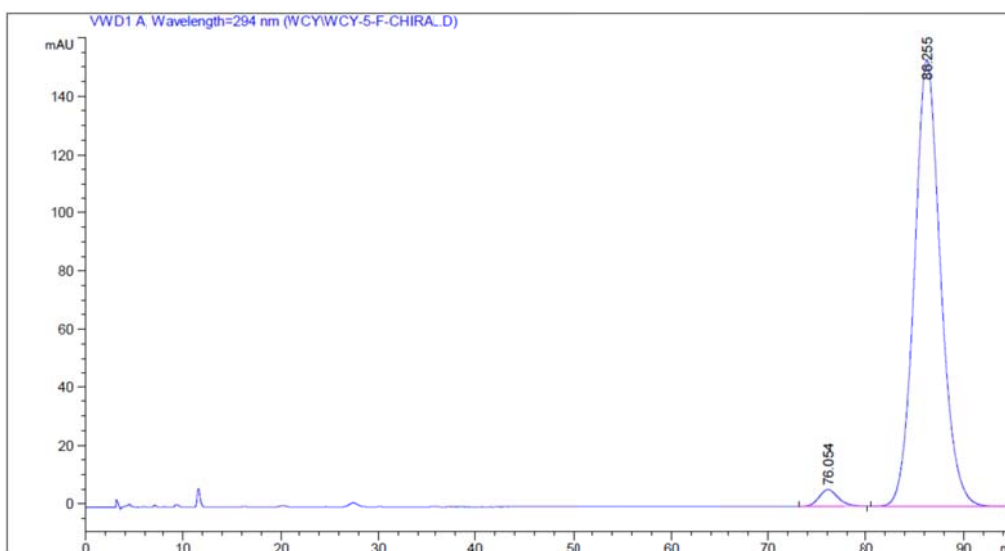

| Peak | Processed channel | Ret. Time (min) | Area (mAu*s) | Height (mAu) | Area (%) |
|------|-------------------|-----------------|--------------|--------------|----------|
| 1    | PDA 294.0 nm      | 76.054          | 766.01086    | 5.71267      | 2.6385   |
| 2    | PDA 294.0 nm      | 86.255          | 2.82658e4    | 153.24281    | 97.3615  |

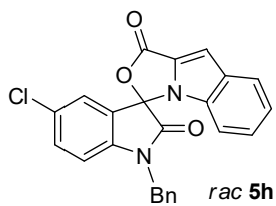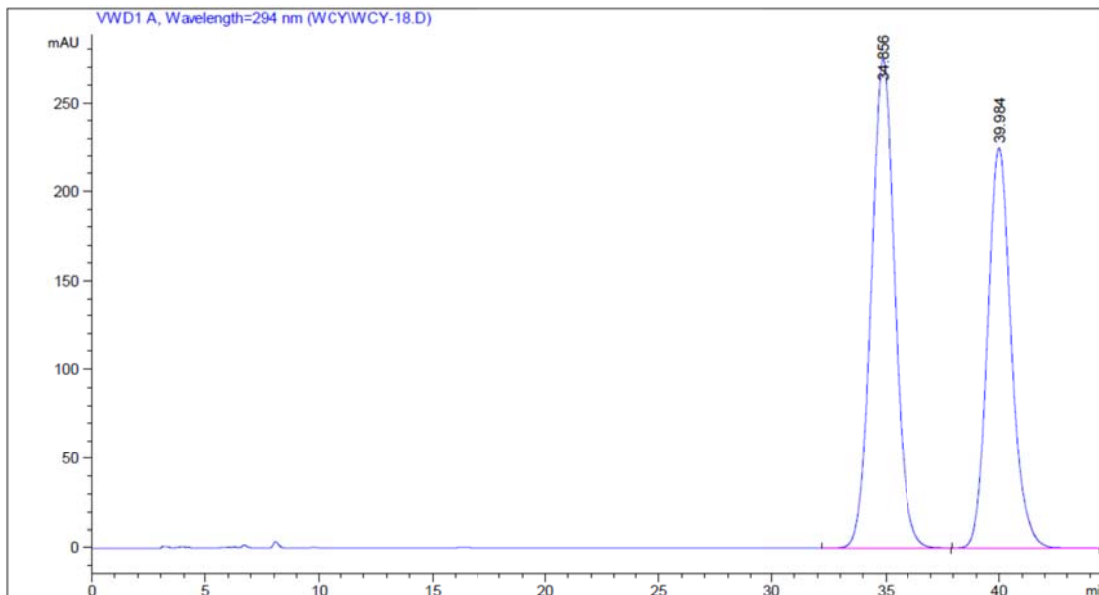

| Peak | Processed channel | Ret. Time (min) | Area (mAu*s) | Height (mAu) | Area (%) |
|------|-------------------|-----------------|--------------|--------------|----------|
| 1    | PDA 294.0 nm      | 34.856          | 1.96477e4    | 274.40750    | 54.9019  |
| 2    | PDA 294.0 nm      | 39.984          | 1.61392e4    | 224.96971    | 45.0981  |

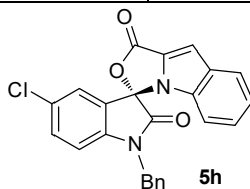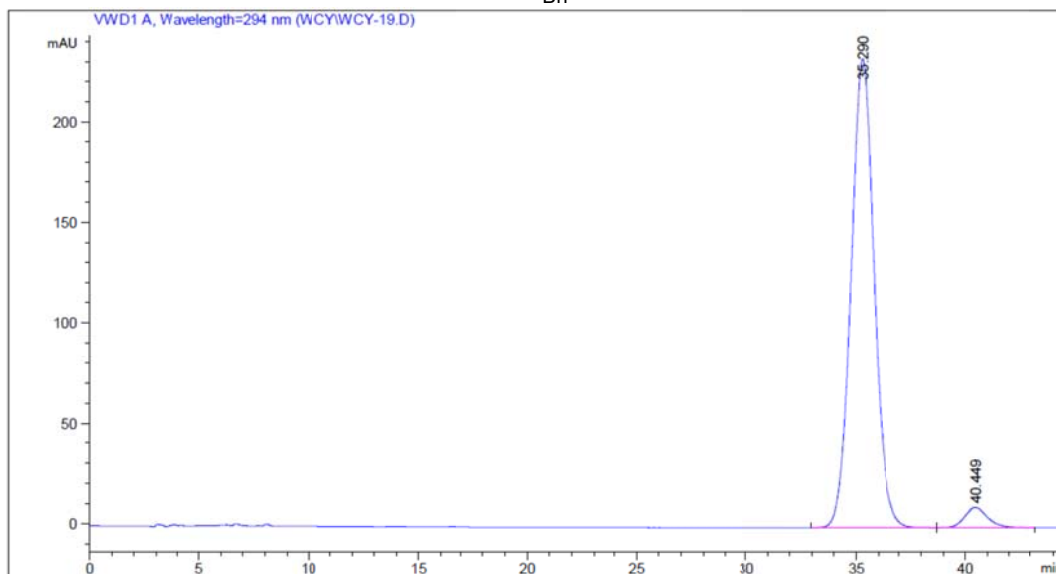

| Peak | Processed channel | Ret. Time (min) | Area (mAu*s) | Height (mAu) | Area (%) |
|------|-------------------|-----------------|--------------|--------------|----------|
| 1    | PDA 294.0 nm      | 35.290          | 1.69711e4    | 233.08875    | 95.9717  |
| 2    | PDA 294.0 nm      | 40.449          | 712.34857    | 9.72455      | 4.0283   |

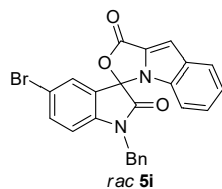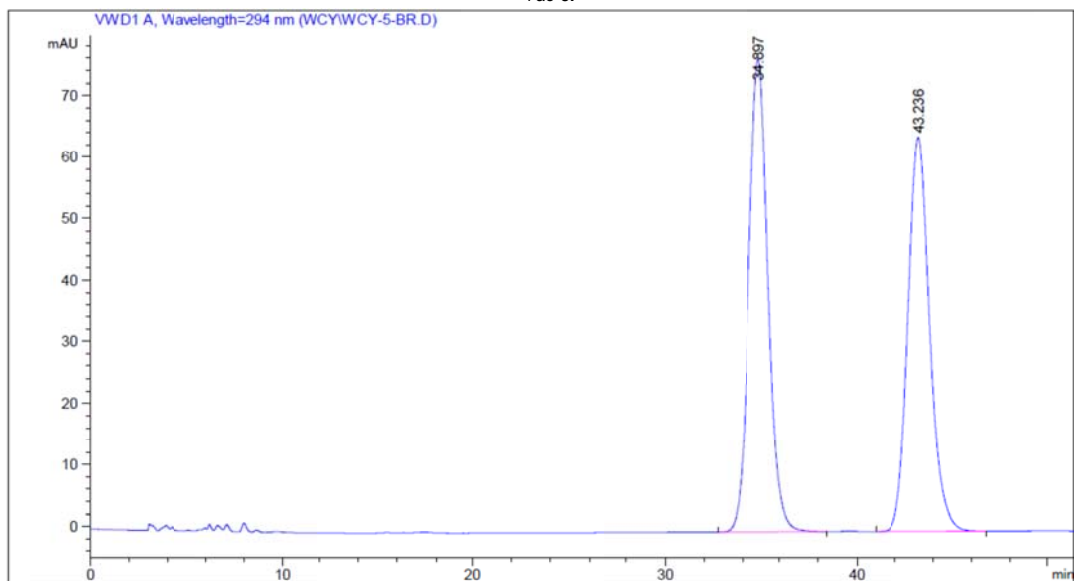

| Peak | Processed channel | Ret. Time (min) | Area (mAu*s) | Height (mAu) | Area (%) |
|------|-------------------|-----------------|--------------|--------------|----------|
| 1    | PDA 294.0 nm      | 34.897          | 5493.46240   | 76.65495     | 52.1803  |
| 2    | PDA 294.0 nm      | 43.236          | 5034.38574   | 63.98945     | 47.8197  |

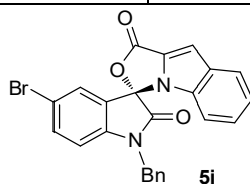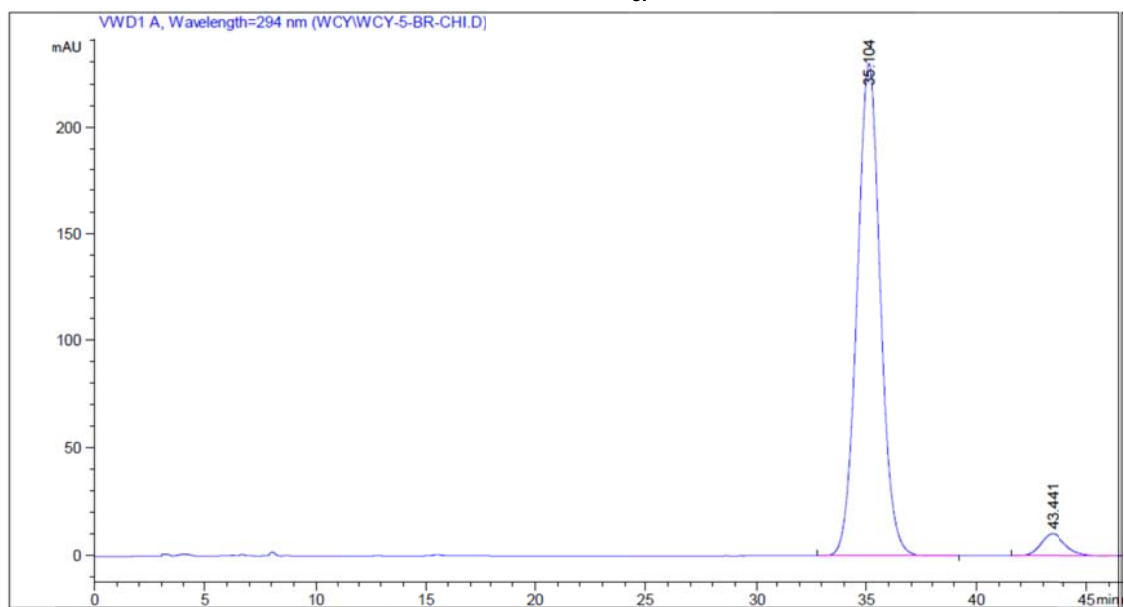

| Peak | Processed channel | Ret. Time (min) | Area (mAu*s) | Height (mAu) | Area (%) |
|------|-------------------|-----------------|--------------|--------------|----------|
| 1    | PDA 294.0 nm      | 35.104          | 1.65311e4    | 229.60469    | 95.3296  |
| 2    | PDA 294.0 nm      | 43.441          | 809.89655    | 10.21602     | 4.6704   |

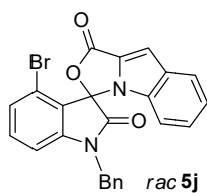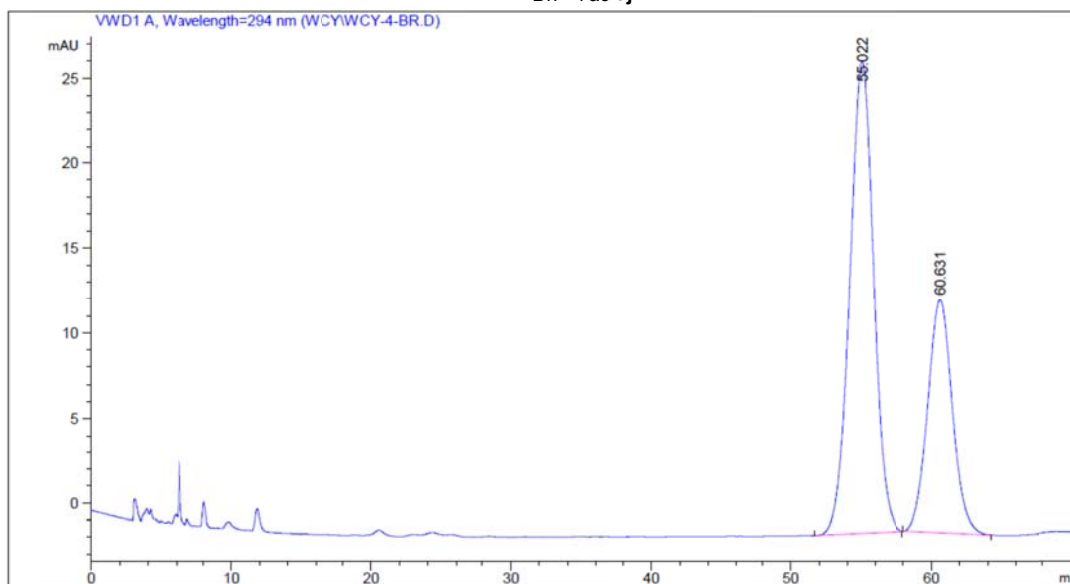

| Peak | Processed channel | Ret. Time (min) | Area (mAu*s) | Height (mAu) | Area (%) |
|------|-------------------|-----------------|--------------|--------------|----------|
| 1    | PDA 294.0 nm      | 55.022          | 3250.98999   | 27.77894     | 66.0611  |
| 2    | PDA 294.0 nm      | 60.631          | 1670.19910   | 13.69331     | 33.9389  |

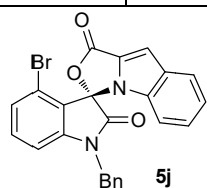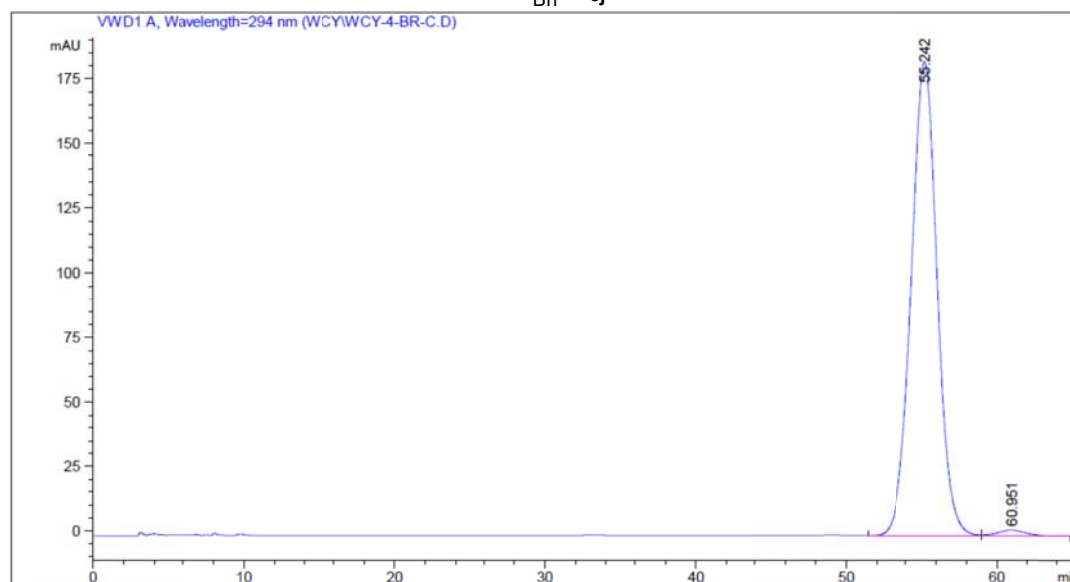

| Peak | Processed channel | Ret. Time (min) | Area (mAu*s) | Height (mAu) | Area (%) |
|------|-------------------|-----------------|--------------|--------------|----------|
| 1    | PDA 294.0 nm      | 55.242          | 2.19329e4    | 183.43774    | 98.7887  |
| 2    | PDA 294.0 nm      | 60.951          | 268.93335    | 2.14819      | 1.2113   |

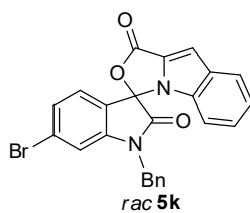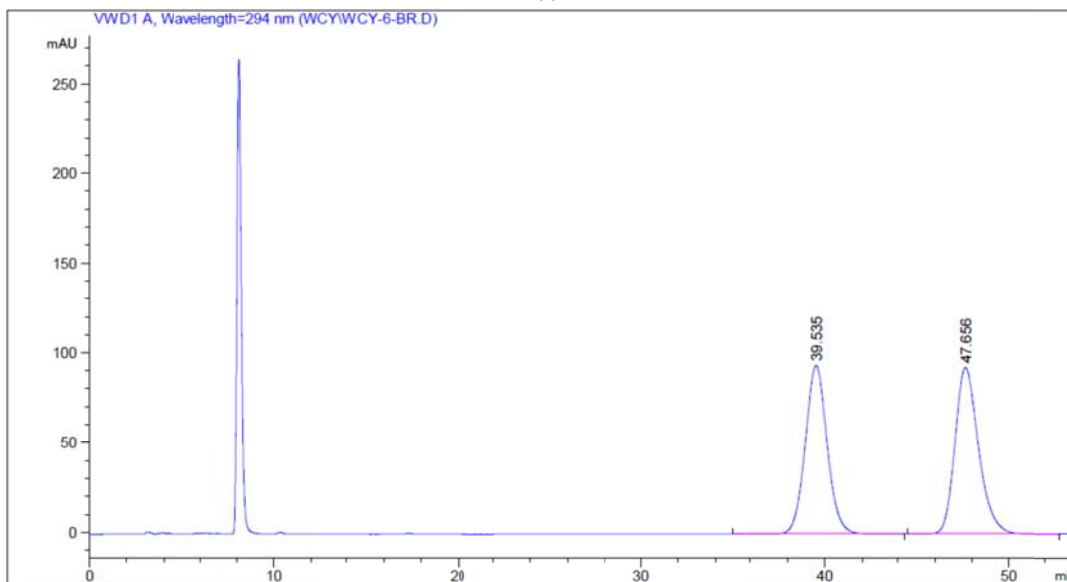

| Peak | Processed channel | Ret. Time (min) | Area (mAu*s) | Height (mAu) | Area (%) |
|------|-------------------|-----------------|--------------|--------------|----------|
| 1    | PDA 294.0 nm      | 39.535          | 7666.39160   | 93.93566     | 48.3137  |
| 2    | PDA 294.0 nm      | 47.656          | 8201.56445   | 92.66058     | 51.6863  |

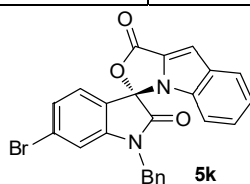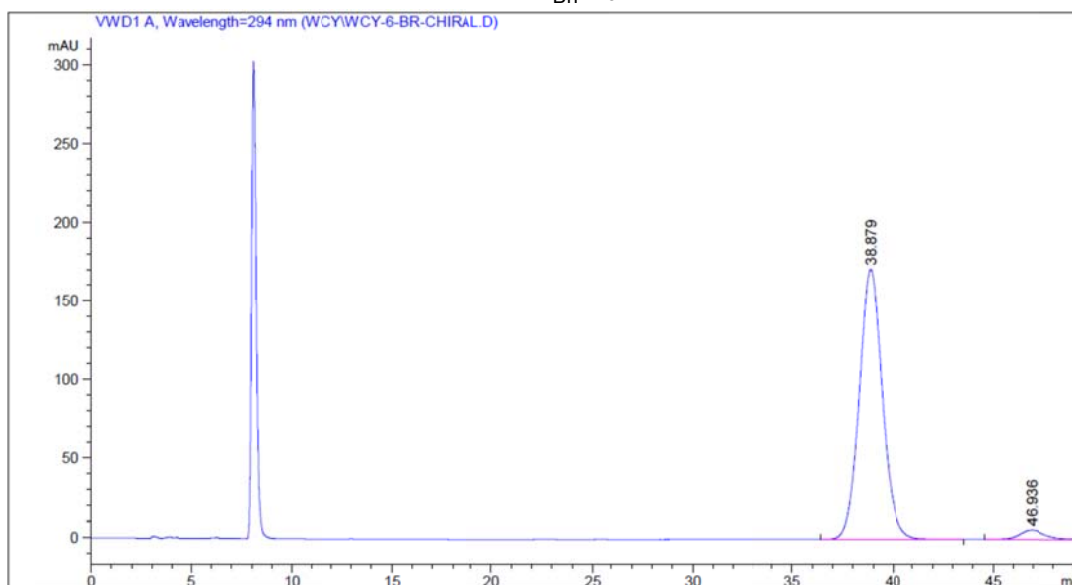

| Peak | Processed channel | Ret. Time (min) | Area (mAu*s) | Height (mAu) | Area (%) |
|------|-------------------|-----------------|--------------|--------------|----------|
| 1    | PDA 294.0 nm      | 38.879          | 1.36627e4    | 171.46104    | 96.5172  |
| 2    | PDA 294.0 nm      | 46.936          | 493.02011    | 5.85665      | 3.4828   |

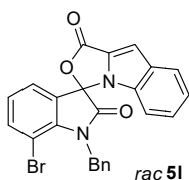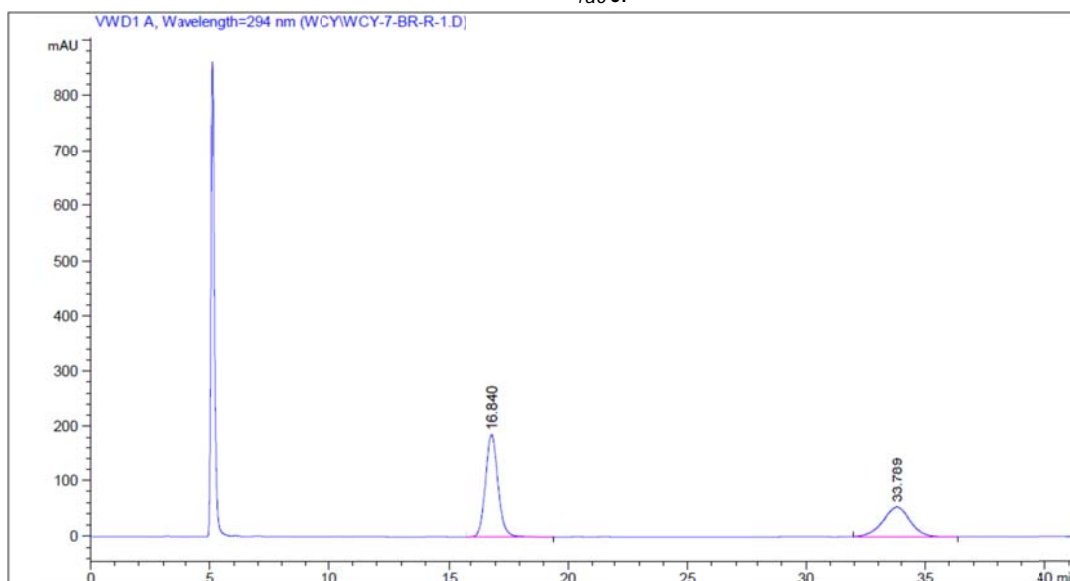

| Peak | Processed channel | Ret. Time (min) | Area (mAu*s) | Height (mAu) | Area (%) |
|------|-------------------|-----------------|--------------|--------------|----------|
| 1    | PDA 294.0 nm      | 16.840          | 6621.51270   | 185.89731    | 60.2188  |
| 2    | PDA 294.0 nm      | 33.789          | 4374.24414   | 53.12273     | 39.7821  |

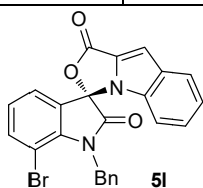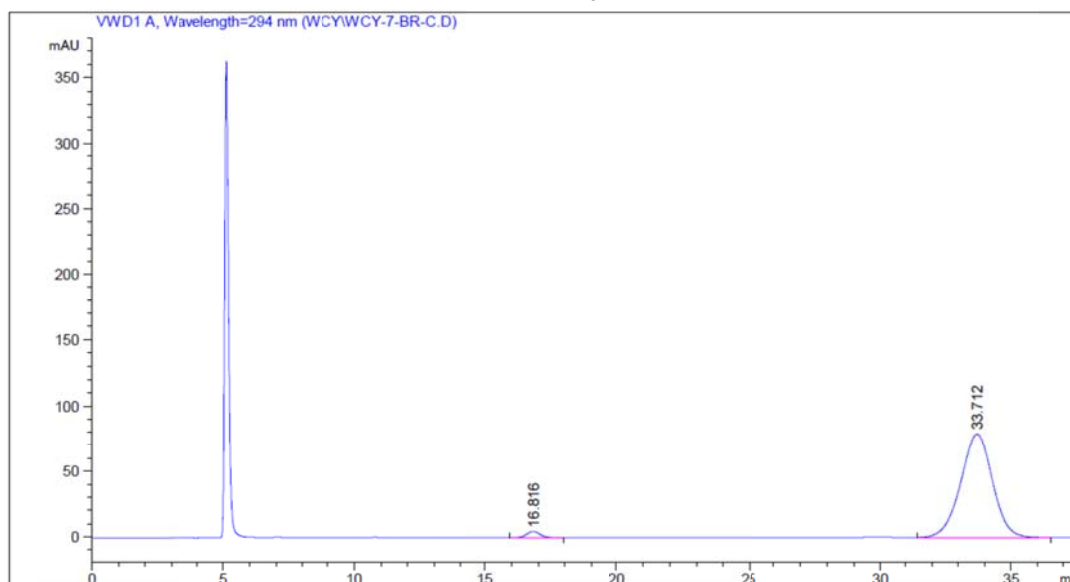

| Peak | Processed channel | Ret. Time (min) | Area (mAu*s) | Height (mAu) | Area (%) |
|------|-------------------|-----------------|--------------|--------------|----------|
| 1    | PDA 294.0 nm      | 16.816          | 169.54294    | 4.84452      | 2.5007   |
| 2    | PDA 294.0 nm      | 33.712          | 6610.35938   | 79.23486     | 97.4993  |

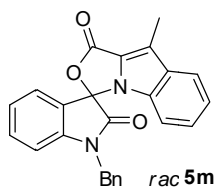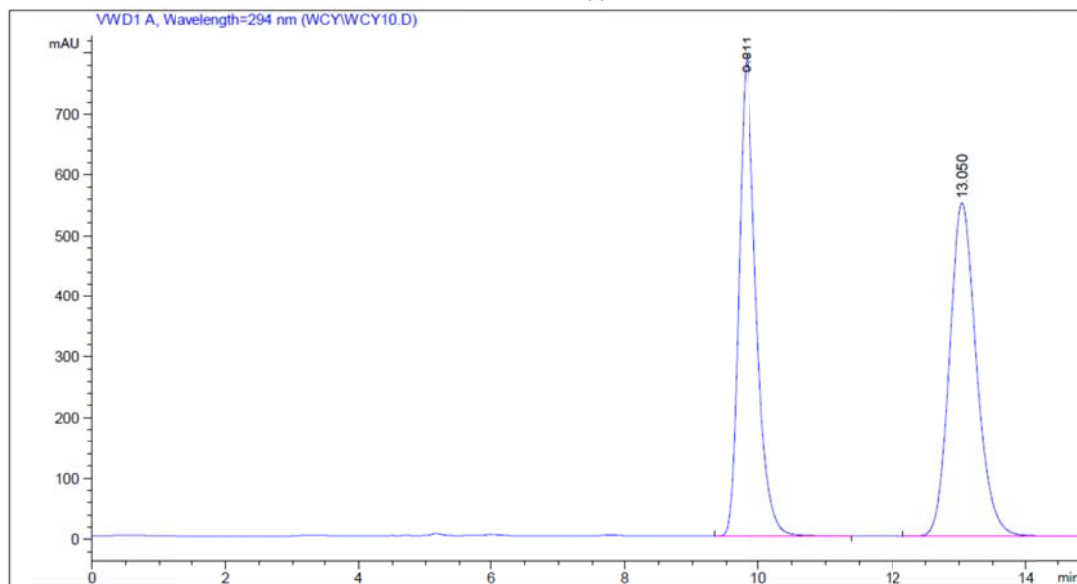

| Peak | Processed channel | Ret. Time (min) | Area (mAu*s) | Height (mAu) | Area (%) |
|------|-------------------|-----------------|--------------|--------------|----------|
| 1    | PDA 294.0 nm      | 9.811           | 1.52269e4    | 784.05084    | 50.0451  |
| 2    | PDA 294.0 nm      | 13.050          | 1.51995e4    | 547.58832    | 49.9549  |

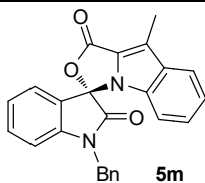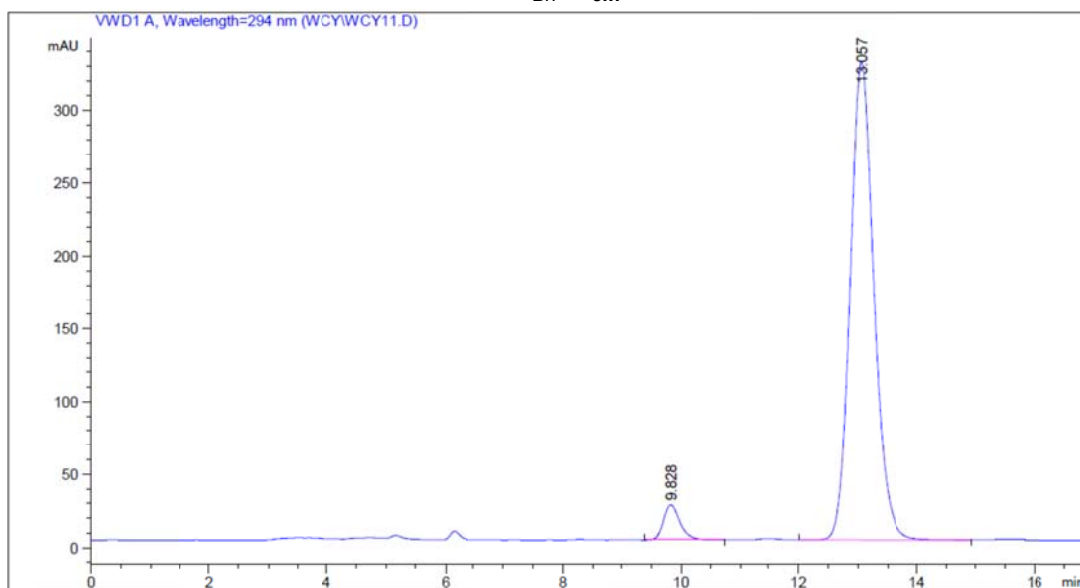

| Peak | Processed channel | Ret. Time (min) | Area (mAu*s) | Height (mAu) | Area (%) |
|------|-------------------|-----------------|--------------|--------------|----------|
| 1    | PDA 294.0 nm      | 9.828           | 452.51416    | 23.45523     | 4.7588   |
| 2    | PDA 294.0 nm      | 13.057          | 9056.49219   | 327.27692    | 95.2412  |



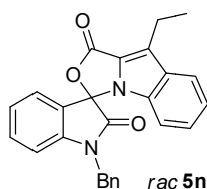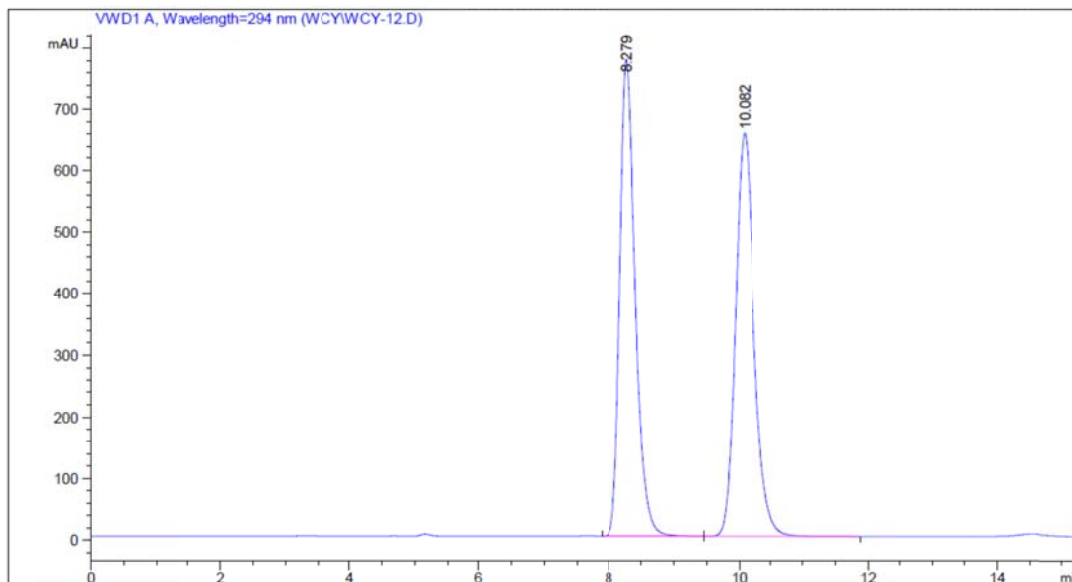

| Peak | Processed channel | Ret. Time (min) | Area (mAu*s) | Height (mAu) | Area (%) |
|------|-------------------|-----------------|--------------|--------------|----------|
| 1    | PDA 294.0 nm      | 8.279           | 1.27214e4    | 775.79187    | 48.0893  |
| 2    | PDA 294.0 nm      | 10.082          | 1.37323e4    | 655.54846    | 51.9107  |

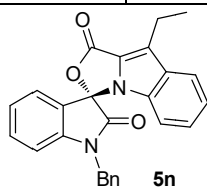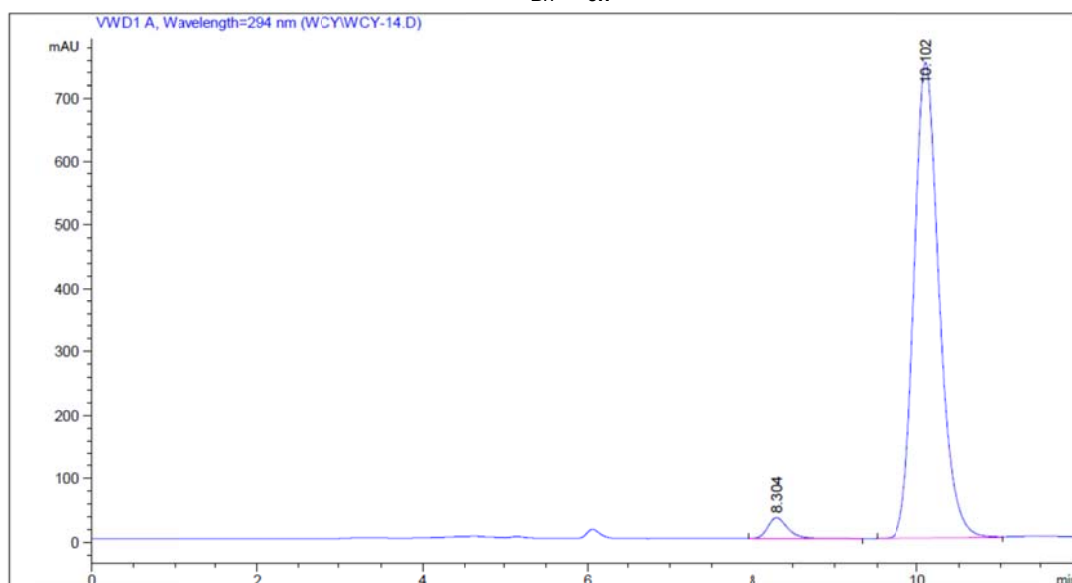

| Peak | Processed channel | Ret. Time (min) | Area (mAu*s) | Height (mAu) | Area (%) |
|------|-------------------|-----------------|--------------|--------------|----------|
| 1    | PDA 294.0 nm      | 8.304           | 544.82556    | 32.78666     | 3.3423   |
| 2    | PDA 294.0 nm      | 10.102          | 1.57559e4    | 749.38763    | 96.6577  |

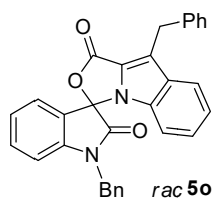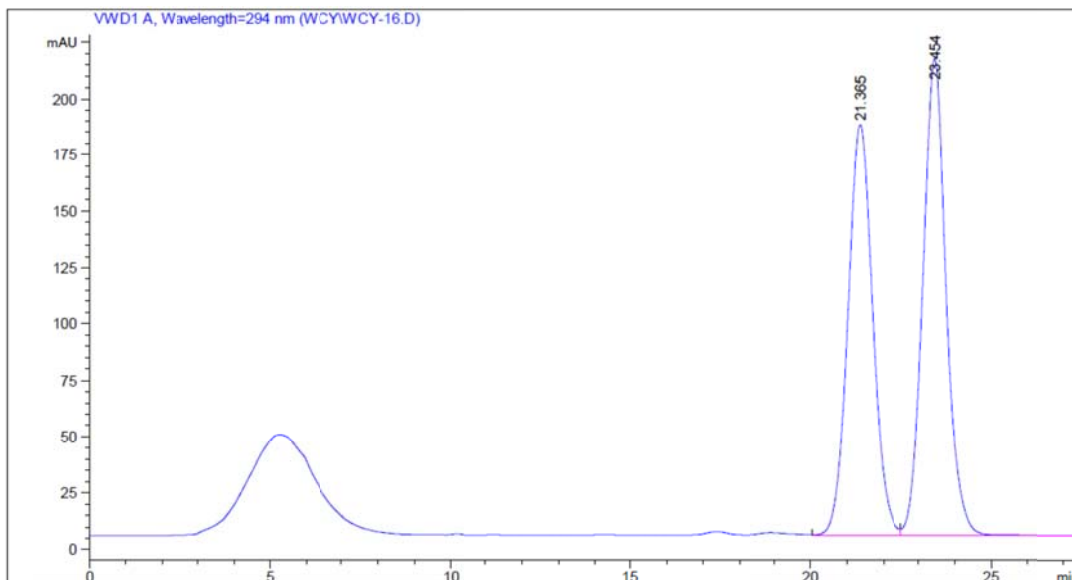

| Peak | Processed channel | Ret. Time (min) | Area (mAu*s) | Height (mAu) | Area (%) |
|------|-------------------|-----------------|--------------|--------------|----------|
| 1    | PDA 294.0 nm      | 21.365          | 8605.78516   | 182.16986    | 47.8269  |
| 2    | PDA 294.0 nm      | 23.454          | 9387.81250   | 211.21138    | 52.1731  |

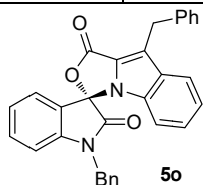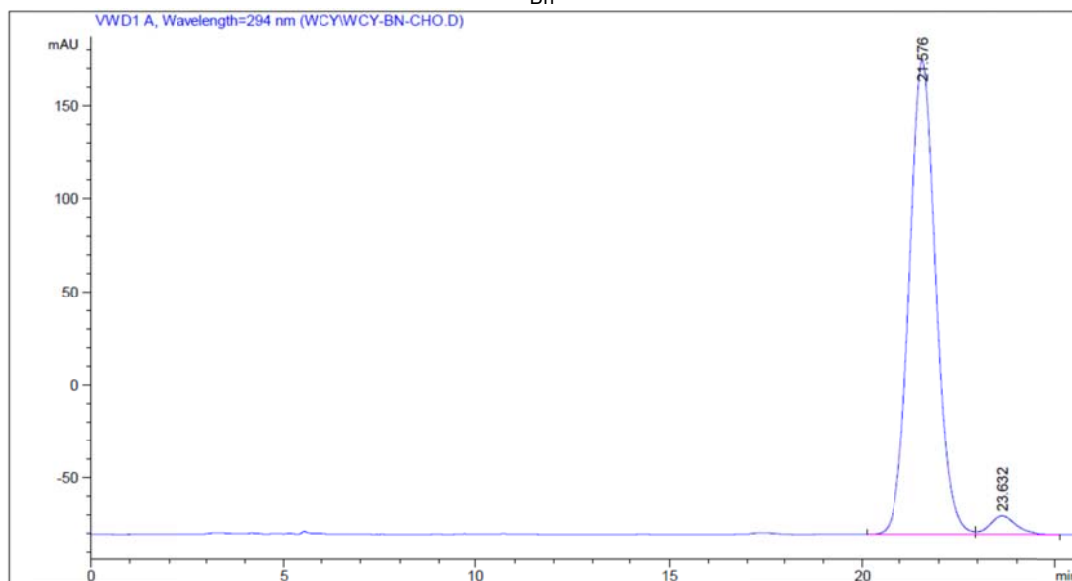

| Peak | Processed channel | Ret. Time (min) | Area (mAu*s) | Height (mAu) | Area (%) |
|------|-------------------|-----------------|--------------|--------------|----------|
| 1    | PDA 294.0 nm      | 21.576          | 1.22341e4    | 254.47762    | 96.3819  |
| 2    | PDA 294.0 nm      | 23.632          | 459.25220    | 9.92803      | 3.6181   |

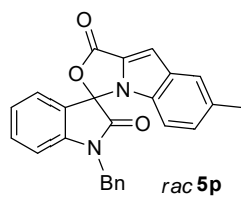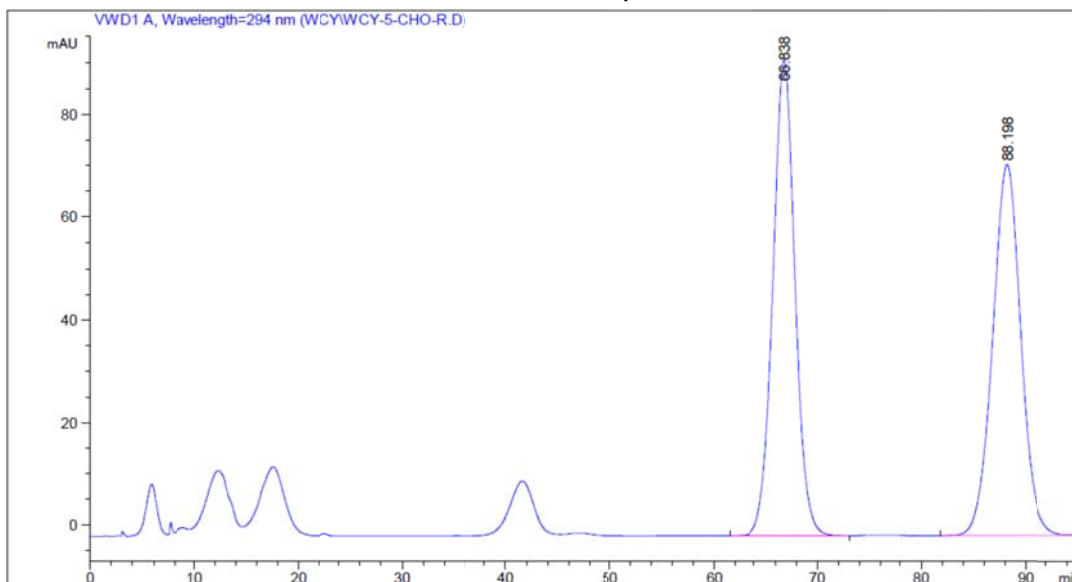

| Peak | Processed channel | Ret. Time (min) | Area (mAu*s) | Height (mAu) | Area (%) |
|------|-------------------|-----------------|--------------|--------------|----------|
| 1    | PDA 294.0 nm      | 66.838          | 1.34698e4    | 92.41288     | 49.9162  |
| 2    | PDA 294.0 nm      | 88.198          | 1.35151e4    | 72.04472     | 50.0838  |

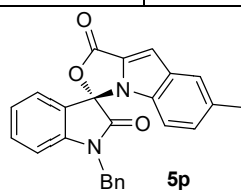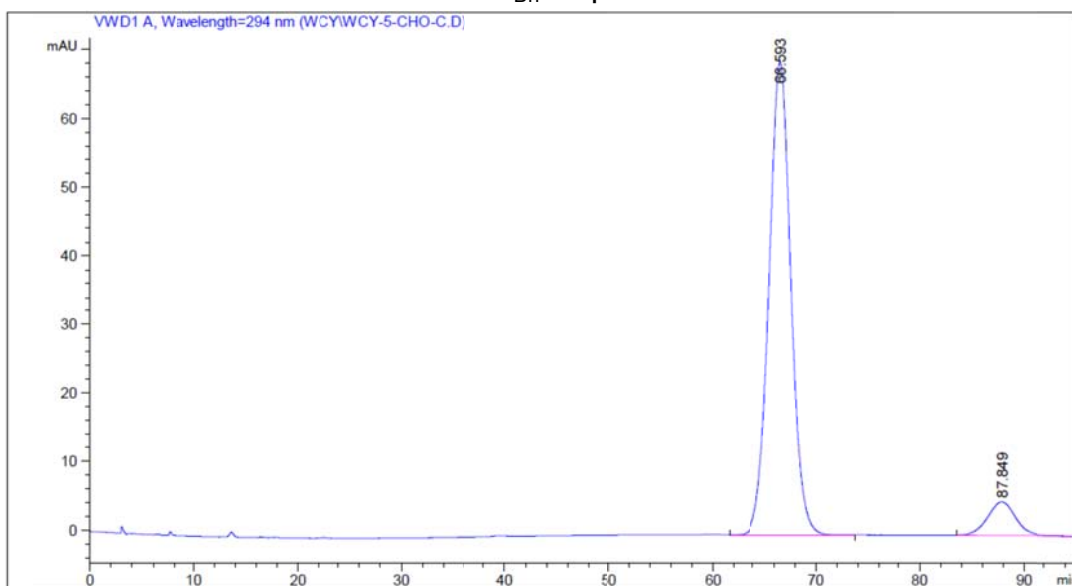

| Peak | Processed channel | Ret. Time (min) | Area (mAu*s) | Height (mAu) | Area (%) |
|------|-------------------|-----------------|--------------|--------------|----------|
| 1    | PDA 294.0 nm      | 66.593          | 9988.19922   | 68.87824     | 91.7623  |
| 2    | PDA 294.0 nm      | 87.849          | 896.65869    | 4.83905      | 8.2377   |

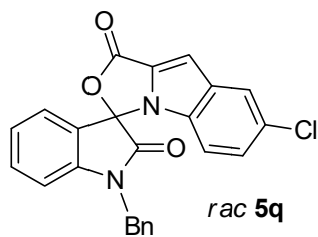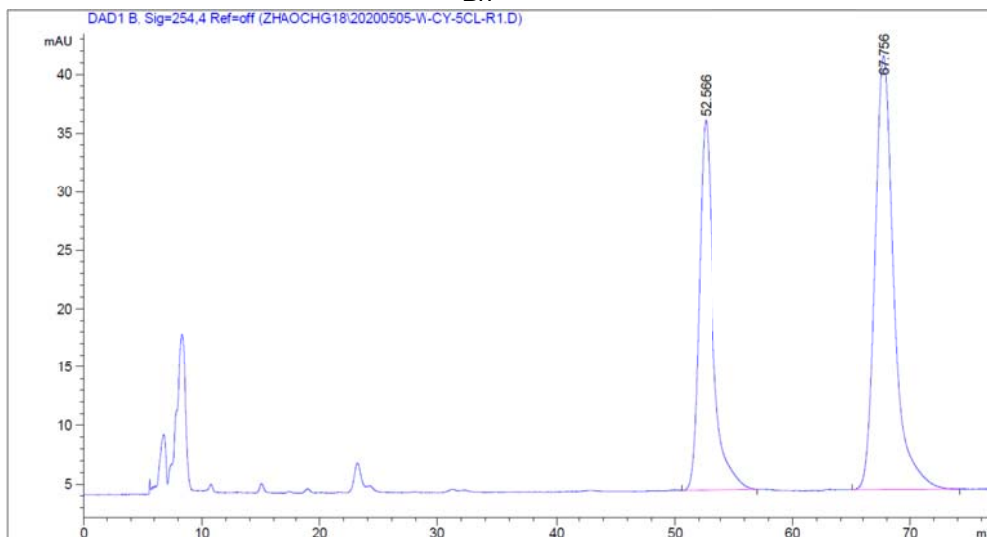

| Peak | Processed channel | Ret. Time (min) | Area (mAu*s) | Height (mAu) | Area (%) |
|------|-------------------|-----------------|--------------|--------------|----------|
| 1    | PDA 254.0 nm      | 52.566          | 2783.06982   | 31.62564     | 40.4818  |
| 2    | PDA 254.0 nm      | 67.756          | 4091.79248   | 37.03612     | 59.5182  |

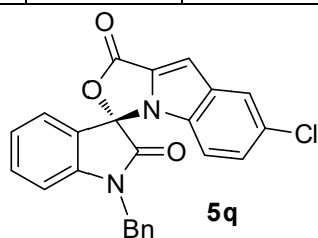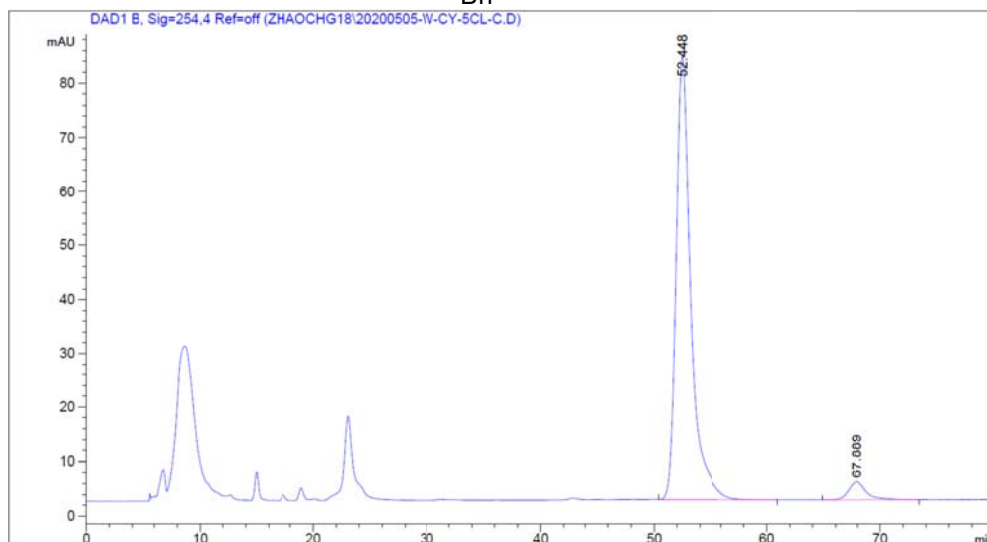

| Peak | Processed channel | Ret. Time (min) | Area (mAu*s) | Height (mAu) | Area (%) |
|------|-------------------|-----------------|--------------|--------------|----------|
| 1    | PDA 254.0 nm      | 52.448          | 7294.73828   | 87.78465     | 95.0363  |
| 2    | PDA 254.0 nm      | 67.889          | 381.00415    | 3.38533      | 4.9637   |

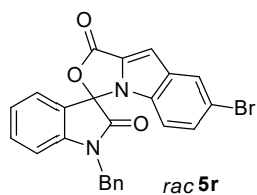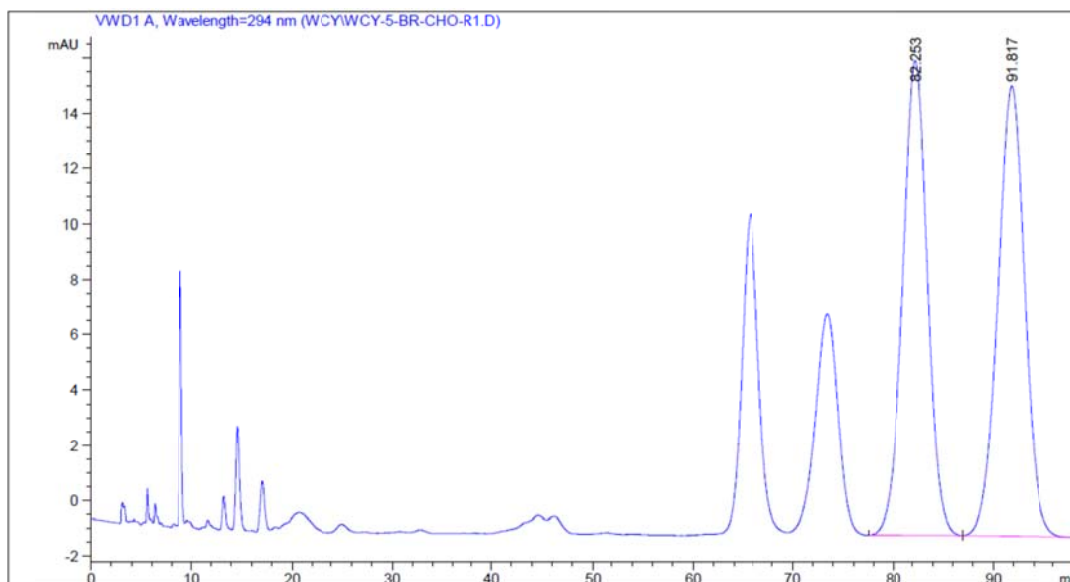

| Peak | Processed channel | Ret. Time (min) | Area (mAu*s) | Height (mAu) | Area (%) |
|------|-------------------|-----------------|--------------|--------------|----------|
| 1    | PDA 294.0 nm      | 82.253          | 2951.16162   | 17.14303     | 49.2568  |
| 2    | PDA 294.0 nm      | 91.817          | 3040.22070   | 16.28676     | 50.7432  |

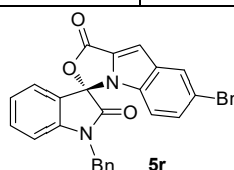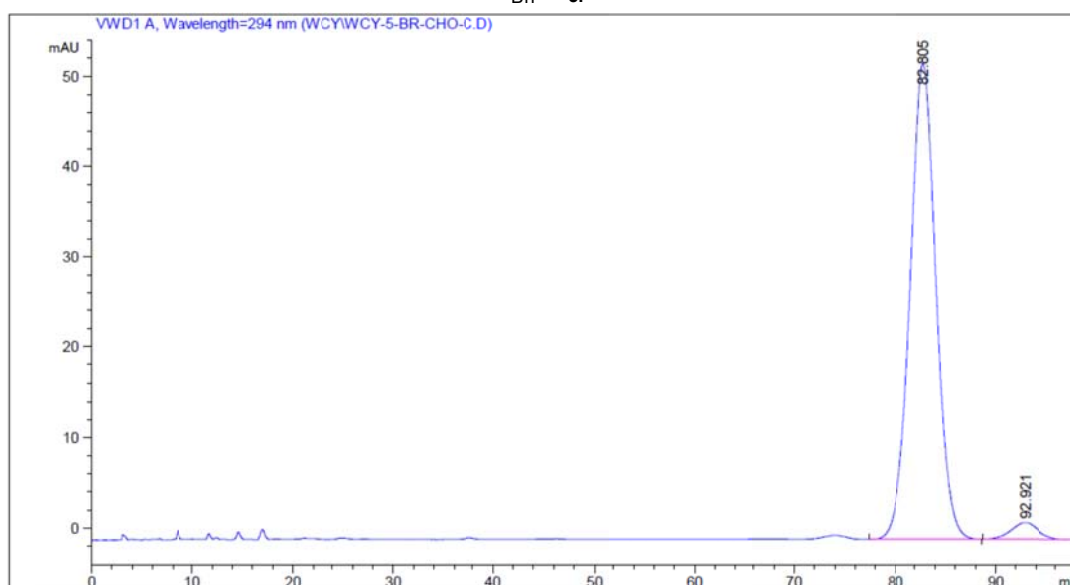

| Peak | Processed channel | Ret. Time (min) | Area (mAu*s) | Height (mAu) | Area (%) |
|------|-------------------|-----------------|--------------|--------------|----------|
| 1    | PDA 294.0 nm      | 82.805          | 9420.01465   | 52.62624     | 96.2964  |
| 2    | PDA 294.0 nm      | 92.921          | 362.29788    | 1.86916      | 3.7036   |

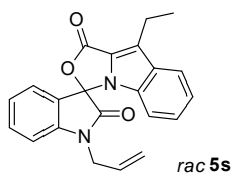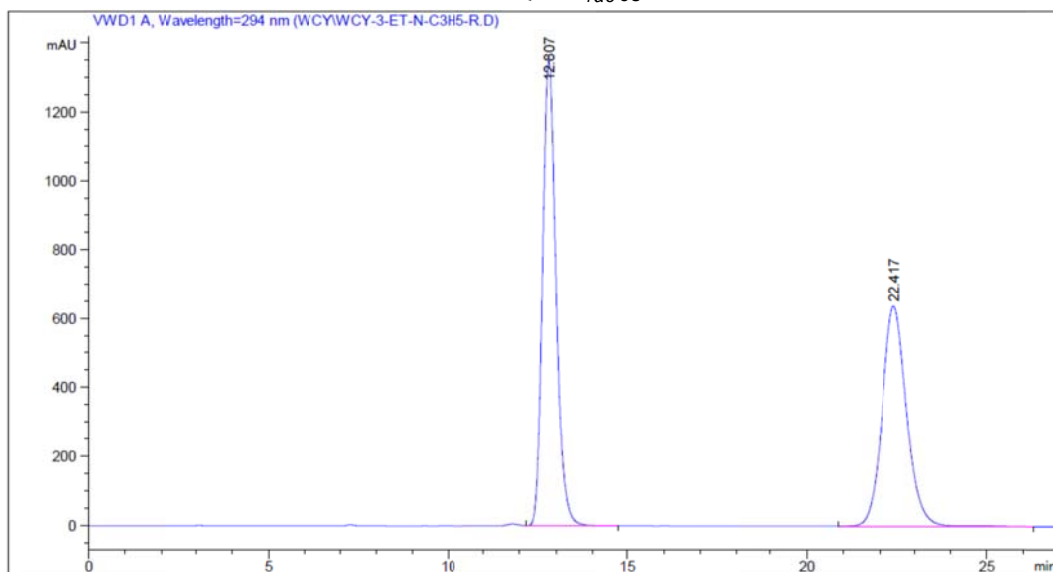

| Peak | Processed channel | Ret. Time (min) | Area (mAu*s) | Height (mAu) | Area (%) |
|------|-------------------|-----------------|--------------|--------------|----------|
| 1    | PDA 294.0 nm      | 12.807          | 3.46980e4    | 1351.60425   | 53.2062  |
| 2    | PDA 294.0 nm      | 22.417          | 3.05163e4    | 637.57477    | 46.7938  |

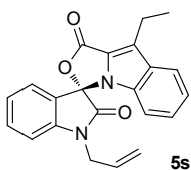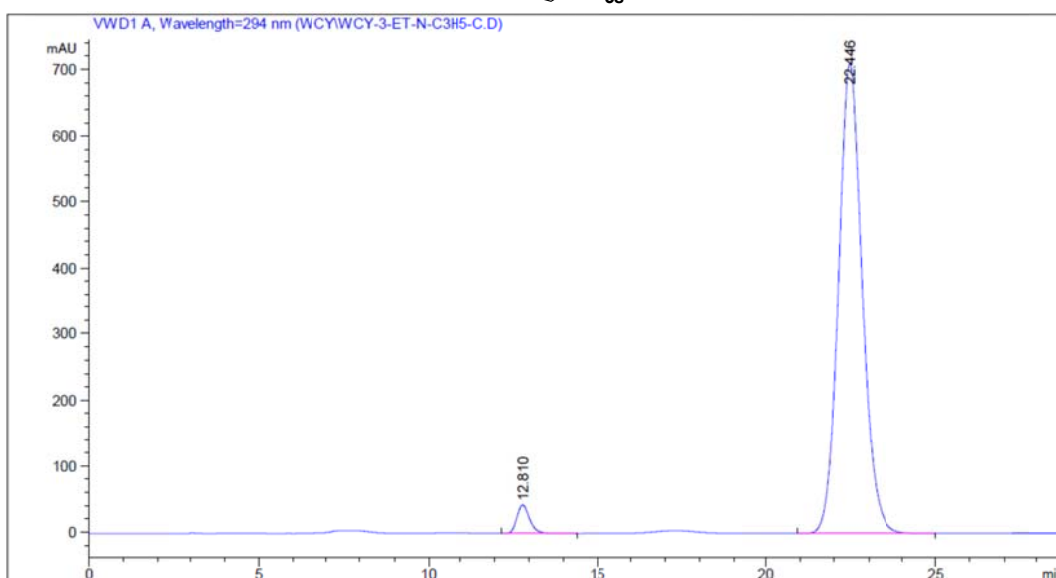

| Peak | Processed channel | Ret. Time (min) | Area (mAu*s) | Height (mAu) | Area (%) |
|------|-------------------|-----------------|--------------|--------------|----------|
| 1    | PDA 294.0 nm      | 12.810          | 1105.50500   | 43.19627     | 3.1356   |
| 2    | PDA 294.0 nm      | 22.446          | 3.41506e4    | 710.54584    | 96.8644  |

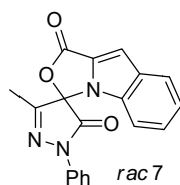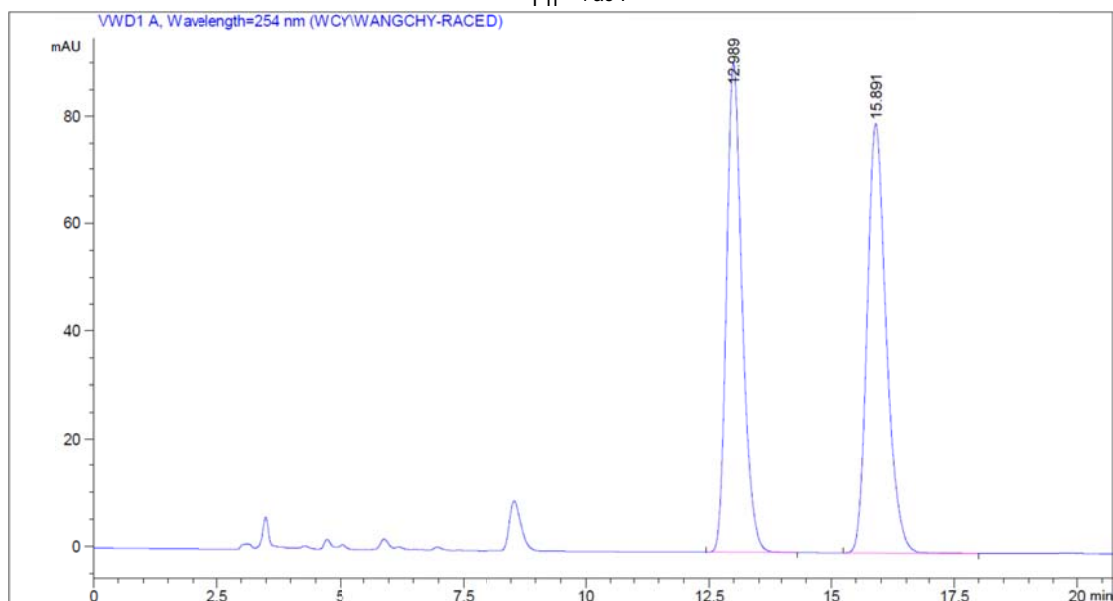

| Peak | Processed channel | Ret. Time (min) | Area (mAu*s) | Height (mAu) | Area (%) |
|------|-------------------|-----------------|--------------|--------------|----------|
| 1    | PDA 254.0 nm      | 12.989          | 1979.45972   | 90.92188     | 48.2861  |
| 2    | PDA 254.0 nm      | 15.891          | 2119.97681   | 79.88206     | 51.7139  |

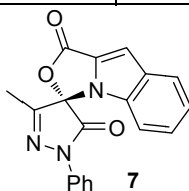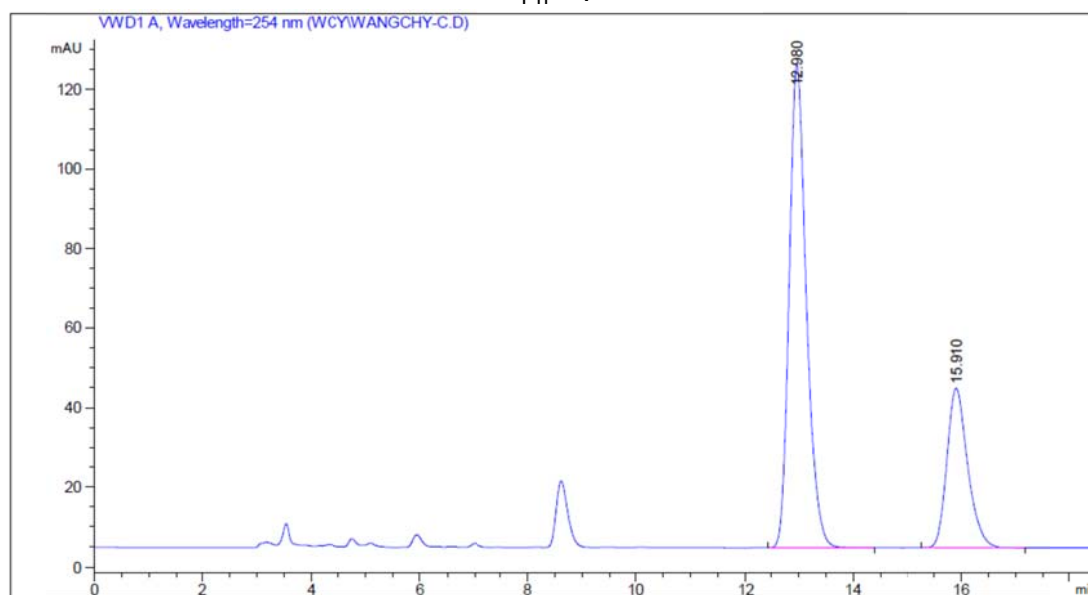

| Peak | Processed channel | Ret. Time (min) | Area (mAu*s) | Height (mAu) | Area (%) |
|------|-------------------|-----------------|--------------|--------------|----------|
| 1    | PDA 254.0 nm      | 12.980          | 2621.02124   | 121.33563    | 71.3508  |
| 2    | PDA 254.0 nm      | 15.910          | 1052.41016   | 39.99773     | 28.6492  |
